# Supplementary material for: Self-adaptive photochromism
Source: PubMed Central journal article supplement — Sci Adv. 2024 Nov 6;10(45):eads2217. doi: 10.1126/sciadv.ads2217 (PMC11540023; doi:10.1126/sciadv.ads2217), 2024-11-06
Supplement: sciadv.ads2217_sm.pdf [file sciadv.ads2217_sm.pdf]

Supplementary Materials for  
**Self-adaptive photochromism**

Fanxi Sun *et al.*

Corresponding author: Yonghao Zheng, zhengyonghao@uestc.edu.cn; Chen Wei, cwei@uestc.edu.cn;  
Dongsheng Wang, wangds@uestc.edu.cn

*Sci. Adv.* **10**, eads2217 (2024)  
DOI: 10.1126/sciadv.ads2217

**The PDF file includes:**

Supplementary Materials and Methods  
Figs. S1 to S30  
Tables S1 to S55  
Legends for movies S1 to S9  
Legends for data S1 and S2

**Other Supplementary Material for this manuscript includes the following:**

Movies S1 to S9  
Data S1 and S2

## 1. Synthesis

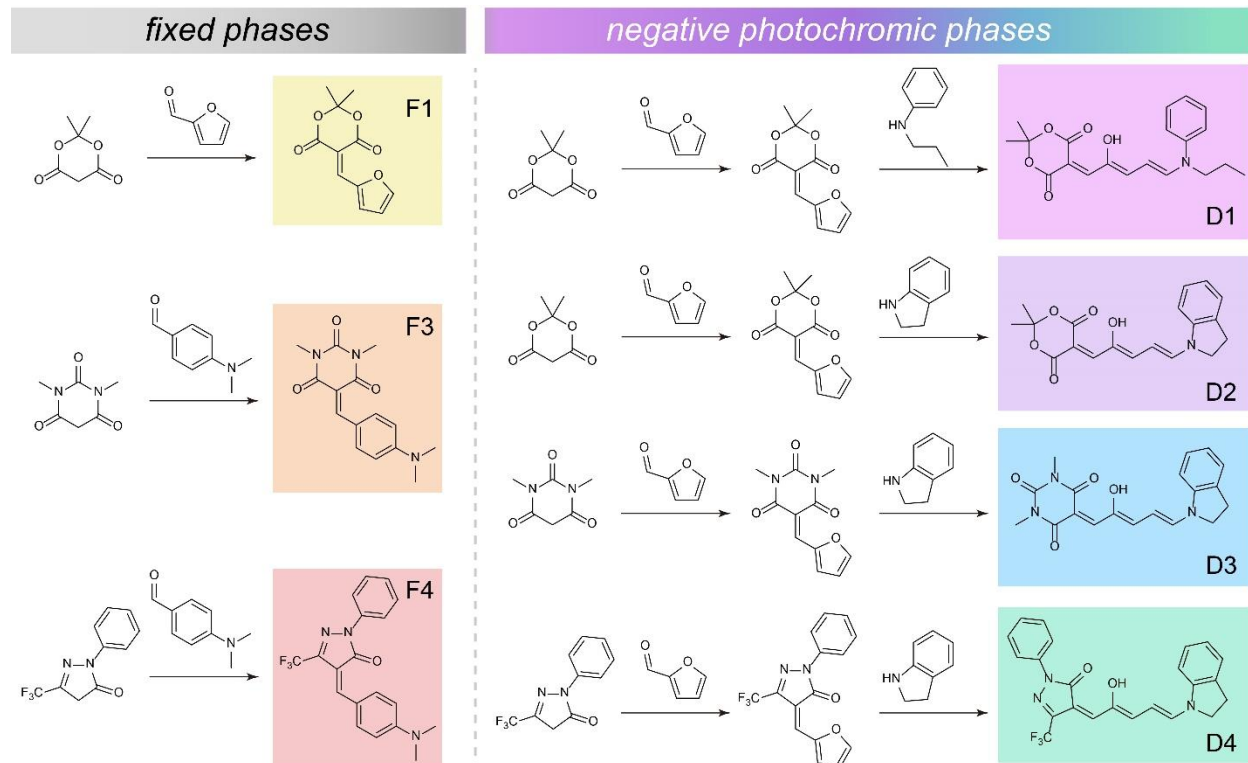

**Fig. S1. Synthetic route for fixed and negative photochromic phases.** Synthetic route for F1, F3, and F4 as fixed phases, and D1, D2, D3, and D4 as negative photochromic phases.

The synthesis of the color-contributing units was shown in **Fig. S1**.

**Synthesis of F1.** 2,2-dimethyl-1,3-dioxane-4,6-dione (1.44 g, 10 mmol) was dissolved into 30 mL distilled water under stirring. After slowly dropping 2-furaldehyde (0.96 g, 10 mmol), the solution was heated to 40°C and kept for 2 h. The formed yellow solid was collected by vacuum filtration, followed by washing with distilled water. The solid was dissolved into 30 mL DCM and sequentially washed with 30 mL saturated NaHSO<sub>3</sub> aqueous solution and 30 mL saturated NaCl aqueous solution for 2 times. The organic layer was dried with Na<sub>2</sub>SO<sub>4</sub> and purified by column chromatography, obtaining 2.11 g yellow product (Yield: 95%). The single crystal structure of F1 is shown in **Fig. S9**.

**Synthesis of F3.** 1,3-dimethylbarbituric acid (1.56 g, 10 mmol) and 4-(dimethylamino)benzaldehyde (1.49 g, 10 mmol) were dissolved into 25 mL ethanol. The solution was then heated to 90 °C under vigorous sitting for 4 h. The red precipitates were collected by filtration and dried overnight to obtain 2.59 g red solid (Yield: 90%). The single crystal structure of F3 is shown in **Fig. S10**.

**Synthesis of F4.** 1-phenyl-3-(trifluoromethyl)-1H-pyrazol-5(4H)-one (2.28 g, 10 mmol) and 4-(dimethylamino)benzaldehyde (1.49 g, 10 mmol) were dissolved into 25 mL ethanol. The solution was then heated to 90 °C under vigorous sitting for 4 h. The red precipitates were collected by

filtration and dried overnight to obtain 3.23 g brown solid (Yield: 90%). The single crystal structure of F4 is shown in **Fig. S11**.

Synthesis of D1. F1 (1.11 g, 5 mmol) was dissolved into 50 mL DCM, followed by slowly adding n-propylaniline (0.68 g, 5 mmol). The reaction was kept stirring at 40 °C and monitored by thin layer chromatography (TLC). The mixture was condensed by rotary evaporation and further purified by column chromatography to give 0.89 g D1 as deep purple solid (Yield: 50%). The single crystal structure of D1 is shown in **Fig. S12**.

Synthesis of D2. F1 (1.11 g, 5 mmol) was dissolved into 50 mL DCM, followed by slowly adding indoline (0.60 g, 5 mmol). After stirring at 40 °C for 2 h, the solution was condensed by rotary evaporation and redissolved in the minimum amount of DCM in a 250 mL beaker. 100 mL cold hexane (-20 °C) was slowly poured into the beaker, which was then transferred to a refrigerator at -20 °C for 30 min and slowly stirred for 5 min. The purple solid was filtered and further purified by column chromatography to give 1.02 g D2 (Yield: 60%). The single crystal structure of D2 is shown in **Fig. S13**.

Synthesis of D3. 1,3-dimethylbarbituric acid (1.56 g, 10 mmol) was dissolved into 30 mL distilled water under stirring. After slowly dropping 2-furaldehyde (0.96 g, 10 mmol), the solution was heated to 40 °C and kept for 2 h. The formed yellow solid was collected by vacuum filtration, followed by washing with distilled water. The solid was dissolved into 30 mL DCM and sequentially washed with 30 mL saturated NaHSO<sub>3</sub> aqueous solution and 30 mL saturated NaCl aqueous solution for 2 times. The organic layer was dried with Na<sub>2</sub>SO<sub>4</sub> and purified by column chromatography, obtaining 1.99 g yellow product as the intermediate (Yield: 85%).

The intermediate (1.17 g, 5 mmol) was dissolved into 50 mL DCM, followed by slowly adding indoline (0.60 g, 5 mmol). After stirring at 40 °C for 2 h, the solution was condensed by rotary evaporation and redissolved in the minimum amount of DCM in a 250 mL beaker. 100 mL cold hexane (-20 °C) was slowly poured into the beaker, which was then transferred to a refrigerator at -20 °C for 30 min and slowly stirred for 5 min. The dark blue solid was filtered and further purified by column chromatography to give 0.88 g D3 (Yield: 50%). The single crystal structure of D3 is shown in **Fig. S14**.

Synthesis of D4. 1-phenyl-3-(trifluoromethyl)-1H-pyrazol-5(4H)-one (2.28 g, 10 mmol) and 2-furaldehyde (0.96 g, 10 mmol) were dissolved into 30 mL DCM and stirred for 2 h at 40 °C. The mixture was condensed by rotary evaporation, which was washed with water and further purified by column chromatography to give 2.45 g intermediate as dark red solid (Yield: 80%).

The intermediate (1.53 g, 5 mmol) was dissolved into methanol at 20 °C, followed by slowly adding Indoline (0.60 g, 5 mmol). Green crystal-like solid slowly precipitated from the dark blue solution, which was filtered and washed several times with cold methanol. The solid was collected and dried overnight to give 1.47 g D4 (Yield: 70%). The single crystal structure of D4 is shown in **Fig. S15**.

## 2. Photoisomerization of DASAs

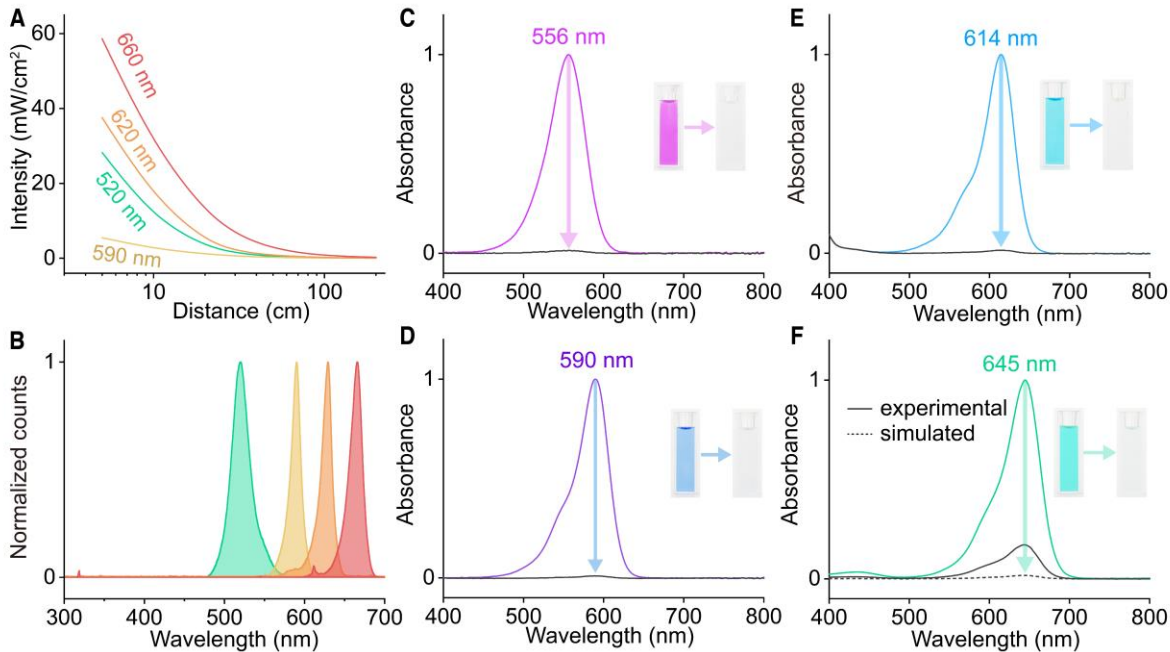

**Fig. S2. Light source information and the absorption spectra of DASAs.** (A) Relationships between light intensity and distance. (B) Normalized luminescence spectra of LED light sources of 520 nm, 590 nm, 620 nm, and 660 nm. (C-F) UV-vis absorption spectra of D1, D2, D3, and D4 before and after visible light irradiation (inner shows the photographic images of the photochromism).

**Table S1. Information of the light sources.** Relationships between light intensity and distance.

| Distance/ cm | Intensity/ mW • cm <sup>-2</sup> |        |        |        |
|--------------|----------------------------------|--------|--------|--------|
|              | 520 nm                           | 590 nm | 620 nm | 660 nm |
| 5            | 28.21                            | 5.49   | 37.53  | 58.60  |
| 10           | 10.79                            | 2.60   | 16.34  | 30.16  |
| 20           | 3.18                             | 1.15   | 4.67   | 12.44  |
| 30           | 1.51                             | 0.62   | 2.15   | 6.74   |
| 40           | 0.86                             | 0.38   | 1.28   | 4.22   |
| 50           | 0.54                             | 0.26   | 0.86   | 2.90   |
| 60           | 0.39                             | 0.19   | 0.63   | 2.13   |
| 70           | 0.28                             | 0.14   | 0.49   | 1.59   |
| 75           | 0.26                             | 0.13   | 0.41   | 1.42   |
| 80           | 0.22                             | 0.11   | 0.36   | 1.26   |
| 90           | 0.18                             | 0.09   | 0.28   | 1.03   |
| 100          | 0.14                             | 0.08   | 0.23   | 0.85   |
| 130          | 0.09                             | 0.05   | 0.14   | 0.53   |
| 150          | 0.07                             | 0.04   | 0.10   | 0.41   |
| 200          | 0.04                             | 0.02   | 0.06   | 0.26   |

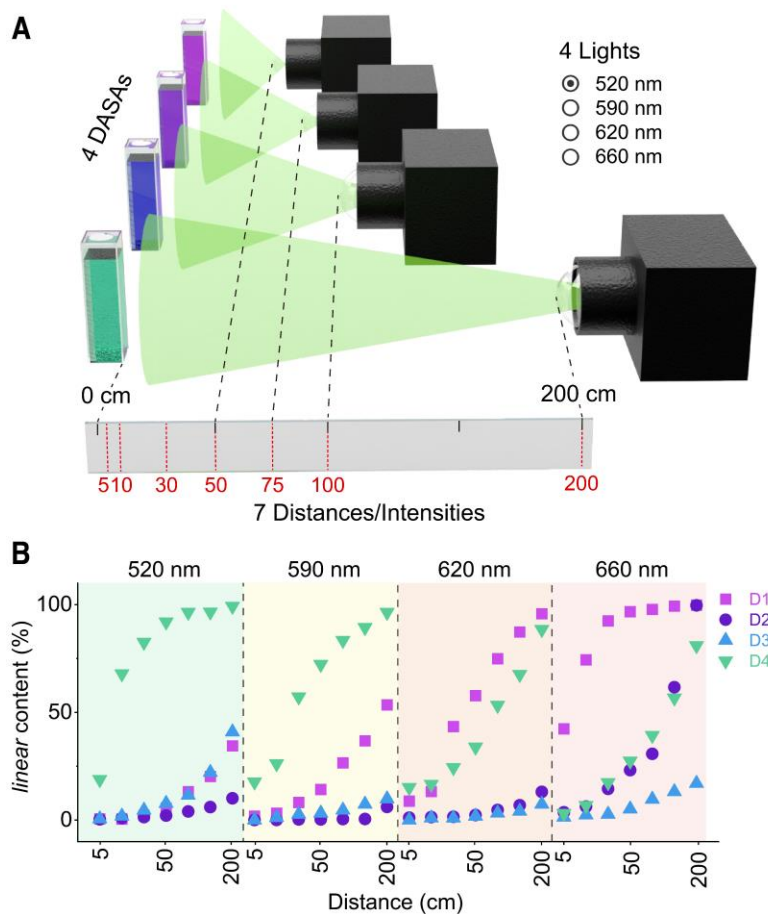

**Fig. S3. Experimental setup and results for testing the linear content of DASAs under different light conditions.** (A) Schematic illustration of the experimental setup for testing the dynamics of isomerization of DASAs under light irradiation with different wavelengths and intensities. The intensity was varied by controlling the distance between the samples and LEDs. (B) *linear* content (%) of DASAs at equilibrium under 520 nm, 590 nm, 620 nm, and 660 nm light irradiation. The distance between the sample and the LEDs was kept between 5 cm and 200 cm.

Preparation of DASAs solutions. PCL was dissolved into the mixed solvent of DCM and THF (9:1, v/v) with the concentration of 0.1 g/mL under stirring. DASAs were dissolved into the mixture with a specific concentration to make the initial absorbance between 0.5 and 1.5, ensuring the accuracy of the spectrophotometer, which was sealed and stored at room temperature in the dark.

Experimental setup. LED lights with the emission wavelength at 520 nm (green), 590 nm (yellow), 620 nm (orange), and 660 nm (red) were used to induce the *linear-to-cyclic* isomerization of DASAs (D1-D4). The interrelationship between the intensity of irradiation and distance was monitored with an illuminometer (Fig. S2). The distance between the sample and LEDs were set

as 5 cm, 10 cm, 30 cm, 50 cm, 75 cm, 100 cm, and 200 cm (**Fig. S3**). The temperature was maintained at 25 °C. Each kinetic measurement lasts 1800 s.

Data processing. DASAs in *cyclic* do not absorb in the visible light region, therefore, the *linear-to-cyclic* isomerization induces the decrease in absorbance. Based on the Lambert-Beer law, the absorbance is linearly dependent with the concentration. Therefore, the portion of *linear* DASAs at any given time ( $L_t$ ) was obtained by the following equation.

$$L_t = \frac{A_t - A_{baseline}}{A_{0s} - A_{baseline}} \times 100\% \quad (3)$$

The *linear* DASAs content (%) at equilibrium ( $L_e$ ) is obtained by fitting (equation 1) except in three scenarios 1) when the R-square is lower than 90%; 2) when the fitted *linear*% is negative (slightly lower than zero); 3) when the first-order exponential function is not applicable to describe *linear-to-cyclic* isomerization, for example, while using an irrelevant light to irradiate the DASAs that has no or little absorption in corresponding wavelength at low intensity (irradiating D1 with 660 nm at 200 cm), no or little isomerization occurs. For these invalid fitting data, the *linear*% at equilibrium ( $L_{e'}$ ) is obtained by only considering the starting ( $L_{0s}$ ) and ending ( $L_{1800s}$ ) *linear*%, by following equation.

$$L_{e'} = \frac{L_{1800s}}{L_{0s}} \times 100\% \quad (4)$$

The raw data of absorbance and transformed *linear* content at each time interval are shown in **Table S4-S32**.

### 3. Optimizing the SAP materials

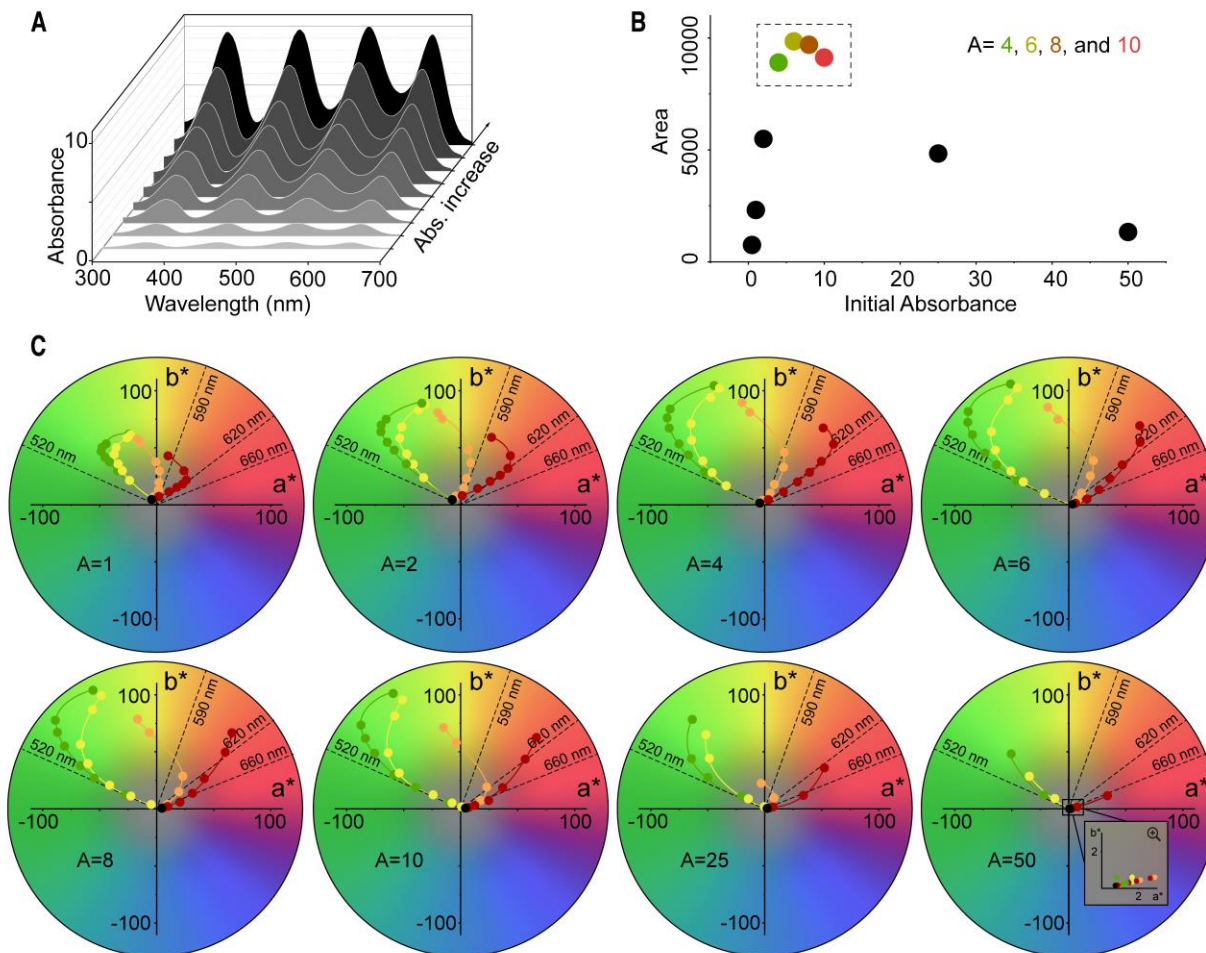

**Fig. S4. Color tunability of A4 solutions under varied light conditions.** (A) Simulated UV-vis absorption spectra of A4 solutions with the initial absorbance increasing from 0.5 to 10 ( $A=25$  and 50 are not shown). (B) Summarized tunable range of color for A4 solutions. (C) Modified CIE 1931  $a^*b^*$  values of A4 solutions (Abs=0.5, 1, 2, 4, 8, 10, 25, and 50) under 520 nm (green), 590 nm (yellow), 620 nm (orange), and 660 nm (red) light irradiation, the distance was kept at 5 cm, 10 cm, 30 cm, 50 cm, 75 cm, 100 cm, 200 cm, dash lines stand for the color of LED lights.

Obtain the  $L^*$ ,  $a^*$ ,  $b^*$  values. The simulated transmission spectra of SAP solutions were input into the plugin of OriginLab (Chromaticity Diagram, Transmittance (0-1), mode D65, Standard Observer CIE 1931 2°) to obtain the  $L^*$ ,  $a^*$ ,  $b^*$  values. To make a direct investigation on the color, the  $a^*$   $b^*$  coordinates were constructed in the chromaticity diagram. For the selection of color-contributing units, the  $L^*$ ,  $a^*$ ,  $b^*$  values of the SAP solutions of A2, A4, A6, R6, A8, and R8 were calculated (**Table S34**). Besides, A4 solutions with the initial absorbance between 0.5 and 50 were investigated (**Table S35**). For the investigation of the SAP solutions under light irradiation, the cumulative absorption spectra were calculated via the equilibrated *linear* content (%) of D1 and D4, the data were obtained from **Fig. 1E**, **Fig. S3B** and **Table S32**. The absorption and transmission spectra of the SAP solutions were recorded in **Fig. S19-S27**, which were further transferred into the  $L^*$ ,  $a^*$ ,  $b^*$  values and recorded in the chromaticity diagram (**Table S36-S44** and **Fig. 3A** and **Fig. S4C**).

Determine the accuracy of color. The accuracy of color without light irradiation (black state) was determined by the sum of  $L^*$  and  $\text{SQRT}(a^{*2}+b^{*2})$ , which represent lightness and deviation, respectively. The  $\text{SQRT}(a^{*2}+b^{*2})$  was obtained through the following equation.

$$\text{SQRT}(a^{*2} + b^{*2}) = \sqrt{a^{*2} + b^{*2}} \quad (5)$$

The absorption spectra of A4 under light irradiation with different wavelengths and intensities were calculated by accumulating the spectra of color-contributed units at photostationary state through the following equation.

$$A = a\varepsilon_{F1} + c\varepsilon_{F3} + e[L_{eD1}\varepsilon_{lD1} + (1 - L_{eD1})\varepsilon_{cD1}] + h[L_{eD4}\varepsilon_{lD4} + (1 - L_{eD4})\varepsilon_{cD4}] \quad (6)$$

$L_{eD1}$  and  $L_{eD4}$  represent the *linear* content at equilibrium for D1 and D4;  $\varepsilon_{lD1}$ ,  $\varepsilon_{cD1}$ ,  $\varepsilon_{lD4}$  and  $\varepsilon_{cD4}$  represent the molar absorption coefficients for *linear* D1, *cyclic* D1, *linear* D4 and *cyclic* D4, respectively. Theoretically, the  $\varepsilon_{cD1}$  and  $\varepsilon_{cD4}$  are equal to 0 between the wavelengths of 400 and 700 nm, due to the dispersed conjugation of *cyclic* DASAs. The information of calculated absorbance spectra was shown in **Fig. S19-S27**.

In the chromaticity diagram, the color of SAP solutions after light irradiation is recorded with a dot with specific  $a^*b^*$  values, while the color of light is recorded with a straight line across the origin of coordinate. The direction of the line is determined according to the emission spectra of the LEDs(**Fig. S2B**). The accuracy of color under light irradiation (colored state) was determined by the difference of angle ( $\Delta\theta$ ) in the chromaticity diagram between the SAP solutions (dot,  $\theta_D$ ) and corresponding light (line,  $\theta_L$ ). For any dot with a specific  $a^*b^*$  value, the  $\theta_D$  could be calculated by the following equation.

$$\theta(a^*, b^*) = \begin{cases} \arctan(b^*/a^*), & b^*/a^* > 0 \\ \arctan(b^*/a^*) + 180, & b^*/a^* < 0 \end{cases} \quad (7)$$

Sequentially, the  $\Delta\theta$  could be obtained by the following equation, and the results were recorded in **Table S47-S55**.

$$\Delta\theta = \theta_D - \theta_L \quad (8)$$



#### 4. Active camouflage of SAP solutions

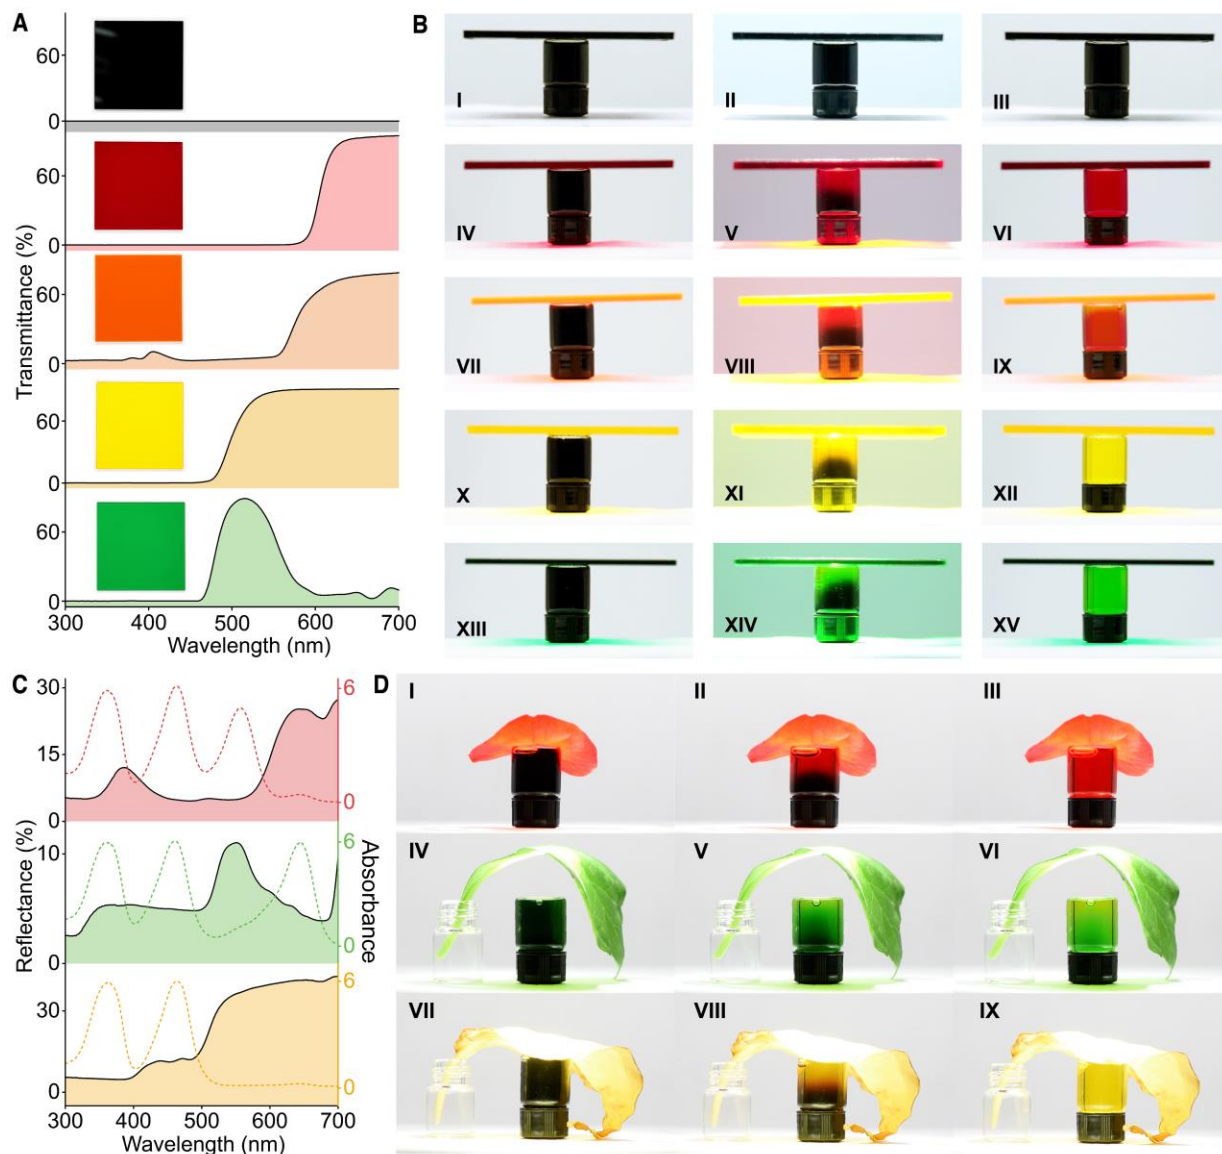

**Fig. S5. Color-changing behavior of SAP solutions under various acrylic plates and natural materials.** (A) Transmission spectra and images of red, orange, yellow and green acrylic plates. (B) Video screenshots of the self-adaptive color-changing process of SAP solutions under red, orange, yellow and green acrylic plates. (C) UV-vis diffuse reflectance spectra of *Cyclamen persicum* (red), *Epipremnum aureum* (green), and *Ginkgo* (yellow) and the UV-vis absorption spectra of the corresponding SAP solutions. (D) Video screenshots of the self-adaptive color-changing process of SAP solutions under red petal, green leaf and yellow leaf.

Preparation of SAP solutions. The color-contributing units were dissolved into the mixture of PCL, DCM and THF to prepare SAP solutions. A4 with the initial absorbance of 6 was selected for the

fabrication. F1, F3, D1 and D4 were dissolved into the mixed solvent, while the absorbance at 362 , 461 , 556 and 645 nm were kept at 3 (in a 0.5 cm cuvette). Due to the spontaneously occurred *linear-to-cyclic* isomerization of D1, the absorbance at 556 nm decreases sharply at the end of the first day (**Fig. S28A-B**). The absorbance at 556 nm keeps decreasing the in the second and third day, which however is less than the first day. Therefore, we used a “little and often” strategy to prepare the SAP solutions. After the first day, a small amount of D1 was added to make the absorbance at 556 nm reaches 3 again (**Fig. S28C-D**). This step was repeated at the third day. The absorbance does not obviously change after 3 days (**Fig. S28E-F**). The SAP solutions were sealed and stored in the dark under room temperature.

*Processing of the video for active camouflage.* The video of active camouflage with acrylic boxes was processed to quantitatively determine the camouflage property of SAP solutions. The LAB color space is based on the human eye’s perception of colors and represent all the colors those the human eyes can perceive. “L” represents the lightness, “A” represents the red-green color difference, and “B” represents the blue-yellow color difference. The total color difference ( $\Delta E$ ) between the two colors is calculated as the following equation.

$$\Delta E = \sqrt{\Delta L^2 + \Delta A^2 + \Delta B^2} \quad (9)$$

To make the calculation simpler, we used a weighted Euclidean distance formula in RGB color space to determine the color difference, as shown in equations S7-S9.

$$\bar{r} = \frac{C_{1,R} + C_{2,R}}{2} \quad (10)$$

$$\begin{cases} \Delta R = C_{1,R} - C_{2,R} \\ \Delta G = C_{1,G} - C_{2,G} \\ \Delta B = C_{1,B} - C_{2,B} \end{cases} \quad (11)$$

$$\Delta C = \sqrt{\left(2 + \frac{\bar{r}}{256}\right) \times \Delta R^2 + 4 \times \Delta G^2 + \left(2 + \frac{255 - \bar{r}}{256}\right) \times \Delta B^2} \quad (12)$$

In this formula,  $\bar{r}$  is the average value of the red channel of colors  $C_{1,R}$  and  $C_{2,R}$  ( $C_1$  and  $C_2$  represent any two channels in the video for comparison),  $\Delta R$  is the difference between the red channel values of colors  $C_{1,R}$  and  $C_{2,R}$ ,  $\Delta G$  is the difference between the red channel values of colors  $C_{1,R}$  and  $C_{2,R}$ ,  $\Delta B$  is the difference between the red channel values of colors  $C_{1,R}$  and  $C_{2,R}$ .

To eliminate the side effects in the video such as reflection on the cuvette, rectangular regions with the size of 10\*40 pixels were selected on both the samples (SAP solution and black ink) and on the acrylic box (as the background), respectively (**Fig. 4D**). For each frame of the video, the average values of the R, G, and B channels within the selected rectangular region were calculated. The color difference on the SAP solution (A), background (B), and black ink (C) were calculated. The source code for the processing of video is available.

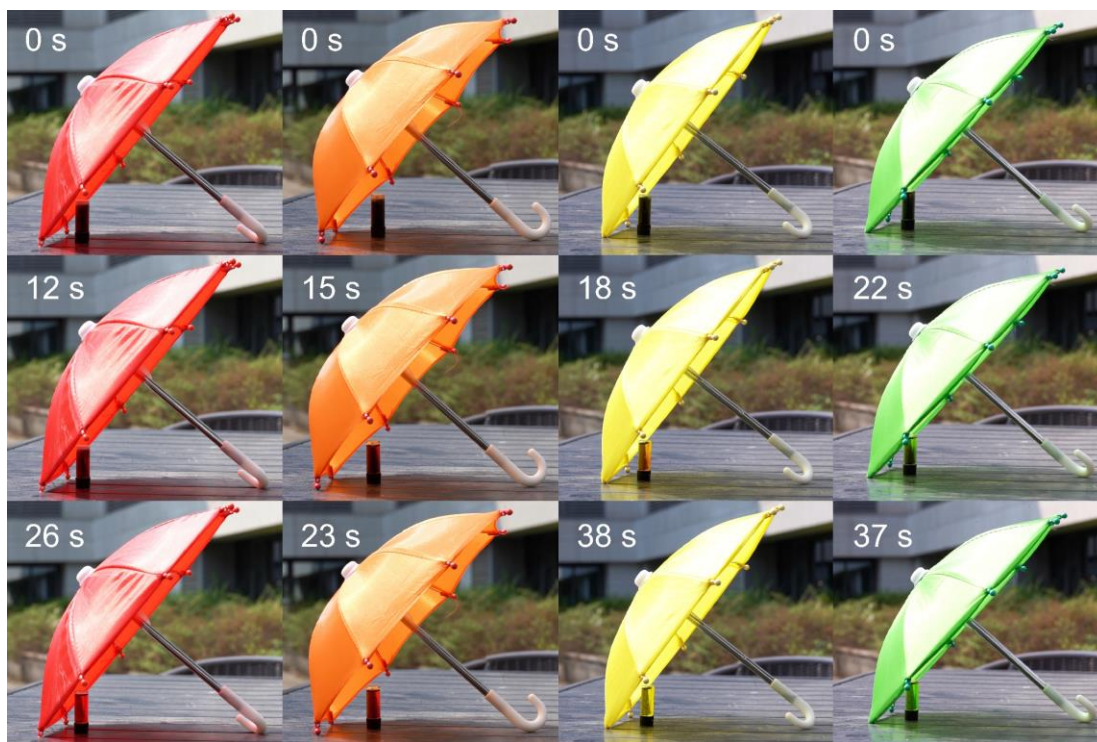

**Fig. S6. Color-changing behavior of SAP solutions under transmitted sunlight.** Photographic images of hiding SAP solutions into red, orange, yellow and green umbrellas under sunlight.

## 5. SAP in the solid state

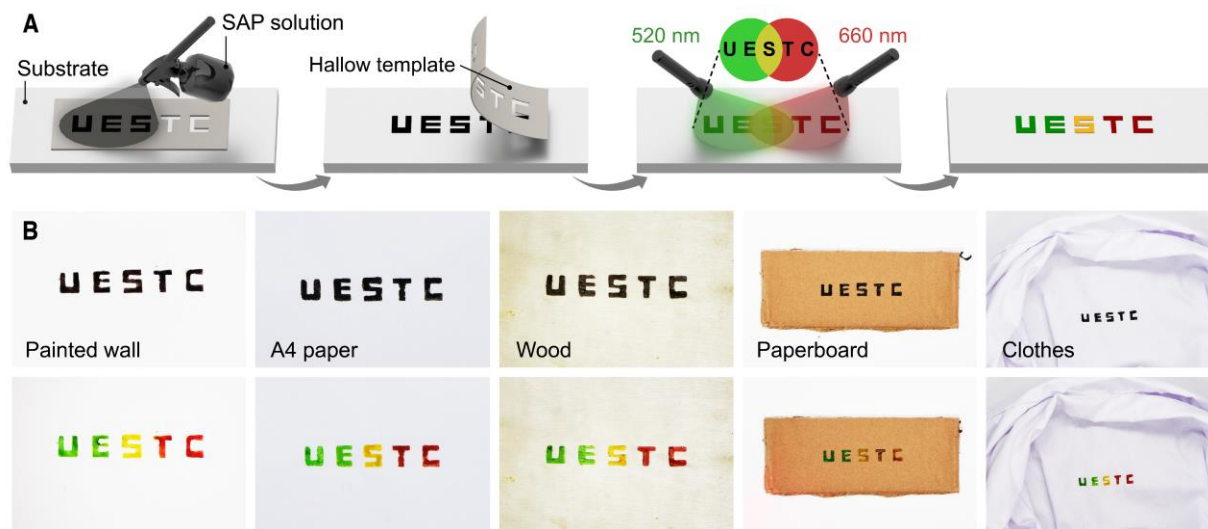

**Fig. S7. Color-changing behavior of SAP coatings on different surfaces.** (A) Schematic illustration of the mask-assisted spray-coating process and irradiation method of green light (520 nm), red light (660 nm) and mixed yellow light. (B) Images of SAP coating on rough surfaces (painted wall, A4 paper, wood, paperboard and clothes), images of the above surfaces irradiated by green light(520 nm), red light(660 nm) and mixed yellow light.

*Fabrication of SAP films.* The SAP film was fabricated by spin-coating with the rotate speed of 500 rpm, rotational acceleration of 100 rpm/s and spin coating time of 60 s. Glass was used as the substrate. After spin-coating, the substrate was annealed in the vaccum oven at 80 °C for 30 min, obtaining a relatively flat and smooth surface. The film was carefully peeled off from the glass substrate.

*Coating on figurine models.* The SAP coatings were prepared in a similar procedure with that for the SAP solutions. The SAP coatings were spray-coated onto the surface of figurine models made of ABS. A commercial spray-coating suit was used, the nozzle diameter is 0.5 mm, the distance between the tube and model is kept at 3 cm, the air pressure is set between 15-30 psi. During the spray-coating, the moving speed of the spraying gun is controlled at 5 cm/s. The spray-coating is repeated for 10 times to make the film thick enough (Fig. S29). After coating, the substrates were annealed by a temperature-adjustable heat gun at 150 °C for 10 s, which generates a smooth surface (Fig. S30).

## 6. Crystal structure of color-contributing units

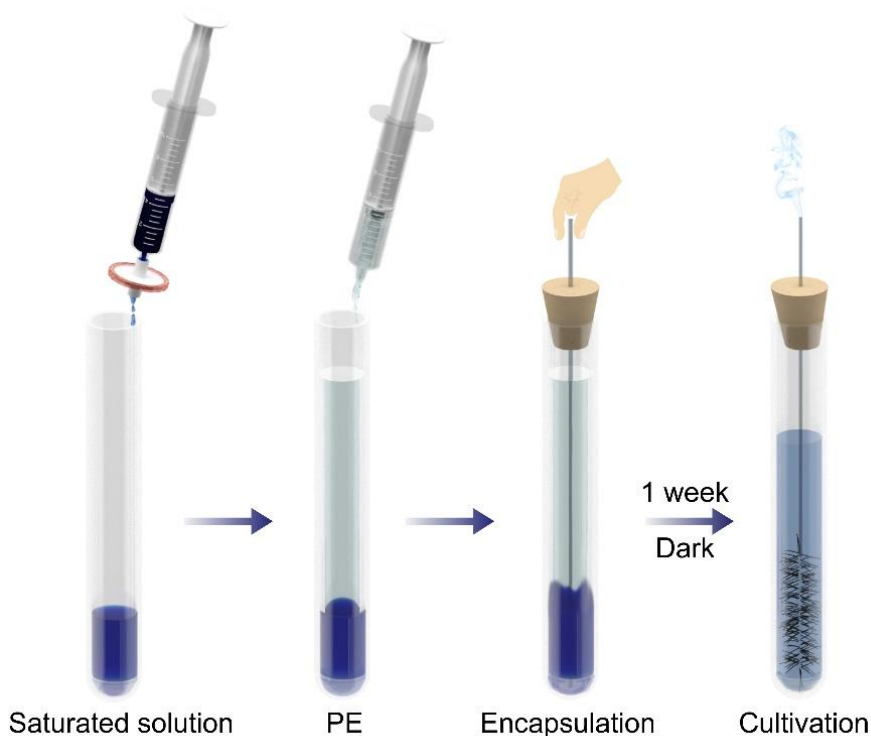

**Fig. S8. Single-crystal growth of color-contributing units.** Schematic illustration of single-crystal growth process.

The single-crystal growth for all the color-contributing compounds is similar (**Fig. S8**). Taking D4 as the example, 3 mL saturated solution of D4 in DCM was filtered through a Teflon filter and injected into a 20 mL glass tube. 15 mL petroleum ether (PE) was carefully added along the wall of the tube without disturbing the surface of the saturated solution. The tube was sealed with a rubber plug. A capillary tube longer than the above glass tube and with an inner diameter of 0.5 mm was slowly punctured through the plug and inserted into the bottom of the glass tube. The tube was placed in the dark for 1 week to evaporate most of the DCM. Crystals with color and fixed morphology are selected for further characterization. The crystal structure data of F1, F3, F4 and D1-D4 were shown in **Fig. S9-S15**.

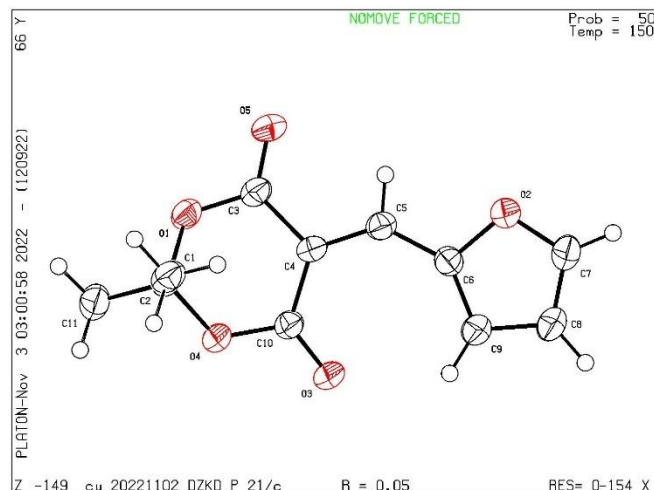

**Fig. S9.** Crystal structure data for 5-(furan-2-ylmethylene)-2,2-dimethyl-1,3-dioxane-4,6-dione (F1). Detailed information can be obtained free of charge from the Cambridge Crystallographic Data Centre via [www.ccdc.cam.ac.uk/data\\_request/cif](http://www.ccdc.cam.ac.uk/data_request/cif) CCDC# 2258709

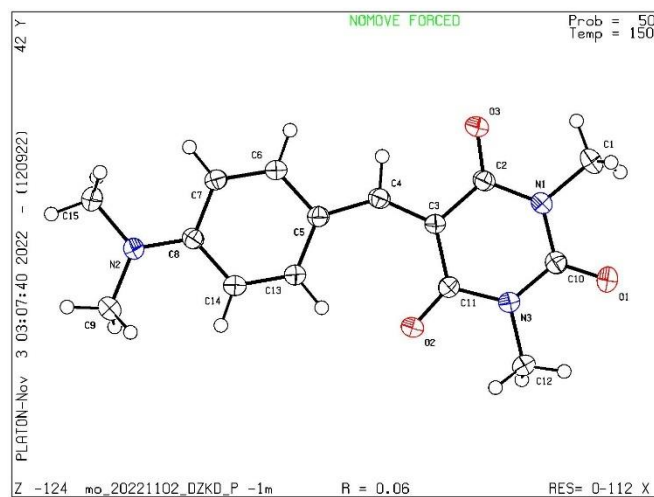

**Fig. S10.** Crystal structure data for 5-(4-(dimethylamino)benzylidene)-1,3-dimethylpyrimidine-2,4,6(1H,3H,5H)-trione (F3). Detailed information can be obtained free of charge from the Cambridge Crystallographic Data Centre via [www.ccdc.cam.ac.uk/data\\_request/cif](http://www.ccdc.cam.ac.uk/data_request/cif) CCDC# 2258710

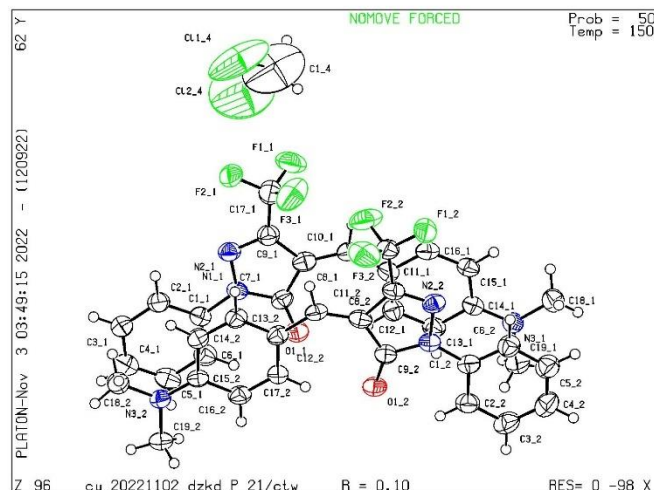

**Fig. S11.** Crystal structure data for **(Z)-4-(furan-2-ylmethylene)-2-phenyl-5-(trifluoromethyl)-2,4-dihydro-3H-pyrazol-3-one (F4)**. Detailed information can be obtained free of charge from the Cambridge Crystallographic Data Centre via [www.ccdc.cam.ac.uk/data\\_request/cif](http://www.ccdc.cam.ac.uk/data_request/cif) CCDC# 2258708

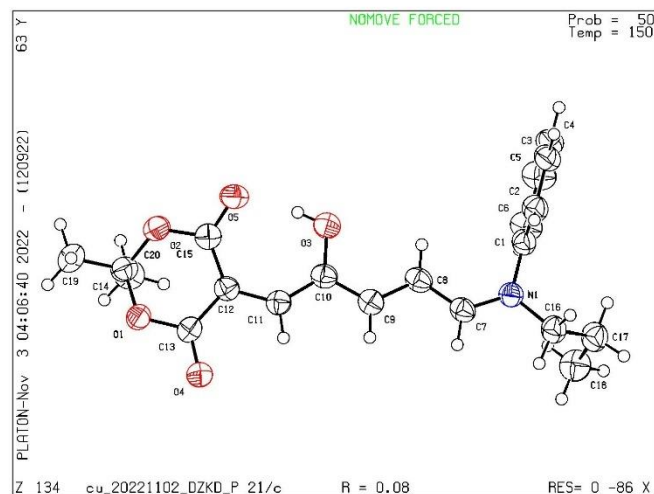

**Fig. S12.** Crystal structure data for **5-((2Z,4E)-2-hydroxy-5-(phenylpropyl)amino)penta-2,4-dien-1-ylidene)-2,2-dimethyl-1,3-dioxane-4,6-dione (D1)**. Detailed information can be obtained free of charge from the Cambridge Crystallographic Data Centre via [www.ccdc.cam.ac.uk/data\\_request/cif](http://www.ccdc.cam.ac.uk/data_request/cif) CCDC# 2258697

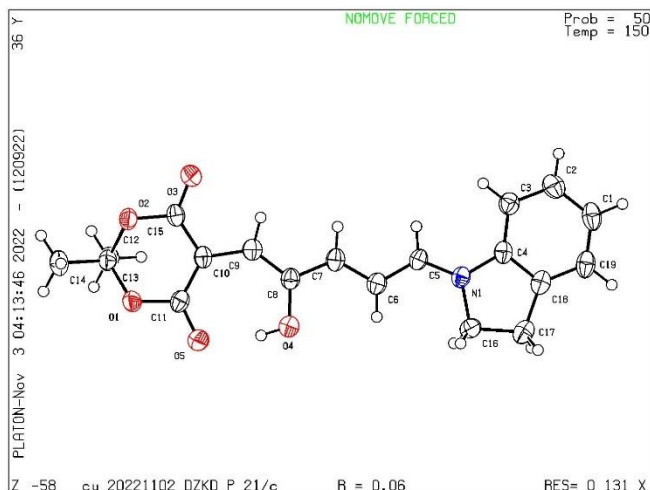

**Fig. S13.** Crystal structure data for 5-((2Z,4E)-2-hydroxy-5-(indolin-1-yl)penta-2,4-dien-1-ylidene)-2,2-dimethyl-1,3-dioxane-4,6-dione (**D2**). Detailed information can be obtained free of charge from the Cambridge Crystallographic Data Centre via [www.ccdc.cam.ac.uk/data\\_request/cif](http://www.ccdc.cam.ac.uk/data_request/cif) CCDC# 2258701

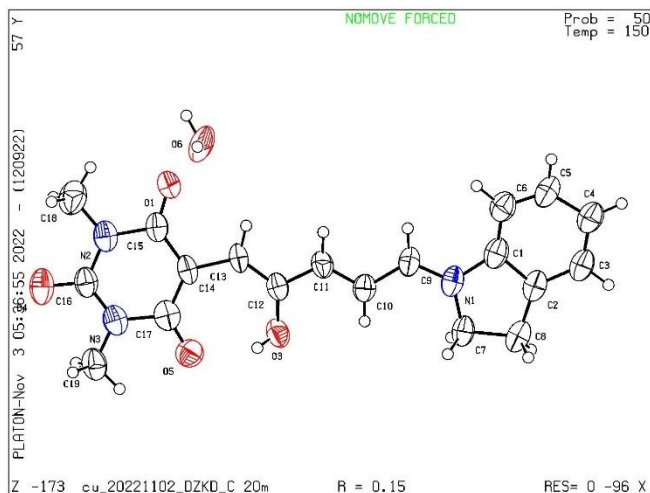

**Fig. S14.** Crystal structure data for 5-((2Z,4E)-2-hydroxy-5-(indolin-1-yl)penta-2,4-dien-1-ylidene)-1,3-dimethylpyrimidine-2,4,6(1H,3H,5H)-trione (**D3**). Detailed information can be obtained free of charge from the Cambridge Crystallographic Data Centre via [www.ccdc.cam.ac.uk/data\\_request/cif](http://www.ccdc.cam.ac.uk/data_request/cif) CCDC# 2258702



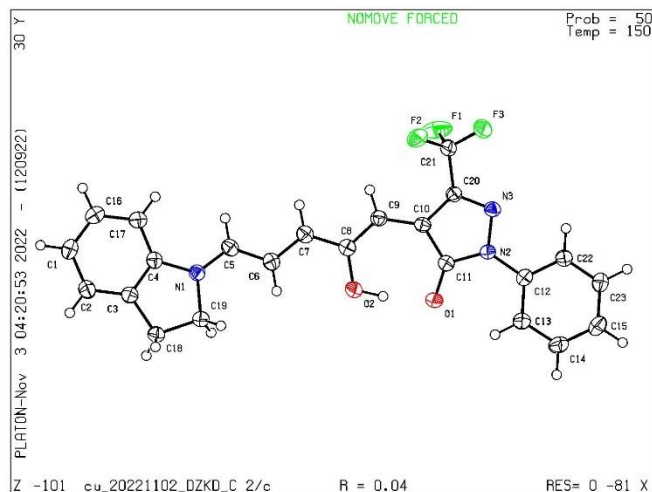

**Fig. S15.** Crystal structure data for **(Z)-4-((2Z,4E)-2-hydroxy-5-(indolin-1-yl)penta-2,4-dien-1-ylidene)-2-phenyl-5-(trifluoromethyl)-2,4-dihydro-3H-pyrazol-3-one (D4)**. Detailed information can be obtained free of charge from the Cambridge Crystallographic Data Centre via [www.ccdc.cam.ac.uk/data\\_request/cif](http://www.ccdc.cam.ac.uk/data_request/cif) CCDC# 2258708

## 7. Molar absorption coefficients for the color-contributing units

For the fixed phases F1-F4, the molar absorption coefficients were obtained right after dissolving the molecules. For photochromic phases D1-D4, the molar absorption coefficients were monitored 3 times in 3 days (**Fig. S16E-P**). The fitting results were shown in **Table S2**.

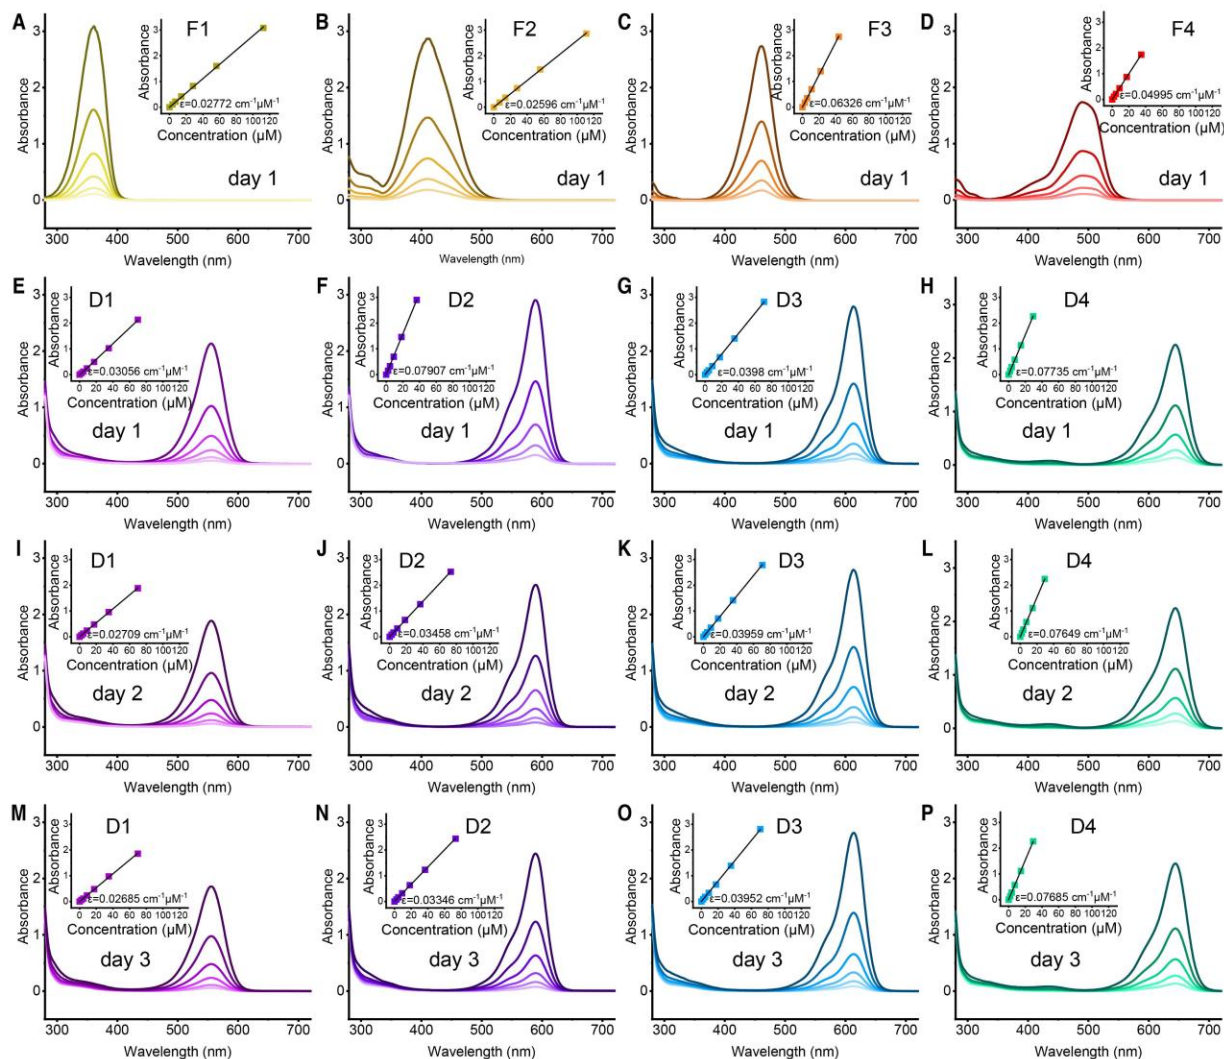

**Fig. S16. UV-vis concentration vs. absorbance curves for Color-contributing units. (A-D)** UV-vis concentration vs. absorbance curves for F1-F4. **(E-H)** UV-vis concentration vs. absorbance curves for D1-D4 on the first day. **(I-L)** UV-vis concentration vs. absorbance curves for D1-D4 on the second day. **(M-P)** UV-vis concentration vs. absorbance curves for D1-D4 on the third day.

D2 shows an obvious drop of molar absorption coefficients in the second day, which became stable in the third day. On the other hand, the molar absorption coefficients of D1, D3 and D4 are stable in 3 days (**Fig. S16-S17**). These results are attributed to the spontaneously occurred *linear-*

to-cyclic isomerization. The *linear* contents (%) for D1-D4 after 3 days were summarized in **Table S3**.

**Table S2.** Molar absorption coefficient of the color-contributing units.

| Molecule | $\epsilon / \text{cm}^{-1}\mu\text{M}^{-1}$ | R-Square |
|----------|---------------------------------------------|----------|
| F1       | 0.02772                                     | 0.9995   |
| F2       | 0.02596                                     | 0.9999   |
| F3       | 0.06326                                     | 0.9999   |
| F4       | 0.04995                                     | 0.9999   |
| D1-Day 1 | 0.03056                                     | 0.9995   |
| D2-Day 1 | 0.07907                                     | 0.9997   |
| D3-Day 1 | 0.0398                                      | 0.9998   |
| D4-Day 1 | 0.07735                                     | 0.9999   |
| D1-Day 2 | 0.02709                                     | 0.9999   |
| D2-Day 2 | 0.03458                                     | 0.9999   |
| D3-Day 2 | 0.03959                                     | 0.9999   |
| D4-Day 2 | 0.07649                                     | 0.9999   |
| D1-Day 3 | 0.02685                                     | 0.9996   |
| D2-Day 3 | 0.03346                                     | 0.9999   |
| D3-Day 3 | 0.03952                                     | 0.9997   |
| D4-Day 3 | 0.07685                                     | 0.9999   |

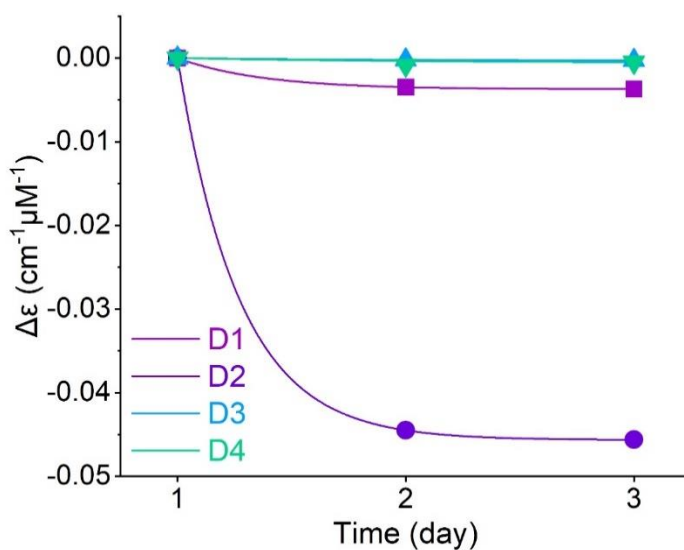

**Fig. S17. Equilibrium *linear* content of D1-D4.** The molar absorption coefficient loss of D1-D4 in 3 days.

**Table S3. Equilibrium *linear* content of D1-D4.** *linear* contents (%) of D1-D4 after keeping for 3 days.

| Molecule | pristine | 1 <sup>st</sup> day | 2 <sup>nd</sup> day | 3 <sup>rd</sup> day |
|----------|----------|---------------------|---------------------|---------------------|
| D1       | 100%     | 100                 | 88                  | 87                  |
| D2       | 100%     | 100                 | 44                  | 42                  |
| D3       | 100%     | 100                 | 99                  | 99                  |
| D4       | 100%     | 100                 | 99                  | 100                 |

## 8. The linear content (%) of DASAs at equilibrium

**Table S4. Raw data of kinetic testing.** Kinetics of D1-D4 (Abs. peak) under the irradiation of 520 nm at 5 cm.

| 520 nm 5 cm   | D1     | D2     | D3    | D4    |
|---------------|--------|--------|-------|-------|
| Abs. baseline | -0.003 | -0.004 | 0.000 | 0.000 |
| 0 s           | 0.568  | 1.347  | 0.479 | 1.565 |
| 1 s           | 0.211  | 1.173  | 0.261 | 1.429 |
| 2 s           | 0.089  | 0.834  | 0.171 | 1.298 |
| 3 s           | 0.043  | 0.592  | 0.119 | 1.165 |
| 4 s           | 0.018  | 0.453  | 0.064 | 1.077 |
| 5 s           | 0.012  | 0.329  | 0.044 | 1.007 |
| 10 s          | 0.000  | 0.123  | 0.009 | 0.786 |
| 15 s          | -0.001 | 0.055  | 0.004 | 0.640 |
| 30 s          | -0.002 | 0.000  | 0.003 | 0.403 |
| 60 s          | -0.002 | -0.003 | 0.002 | 0.292 |
| 120 s         | -0.002 | -0.003 | 0.001 | 0.281 |
| 180 s         | -0.002 | -0.003 | 0.001 | 0.289 |
| 300 s         | -0.002 | -0.003 | 0.001 | 0.290 |
| 600 s         | -0.002 | -0.004 | 0.000 | 0.288 |
| 1200 s        | -0.002 | -0.004 | 0.000 | 0.288 |
| 1800 s        | -0.002 | -0.004 | 0.000 | 0.288 |

**Table S5. Raw data of kinetic testing.** Kinetics of D1-D4 (Abs. peak) under the irradiation of 520 nm at 10 cm.

| 520 nm 10 cm  | D1    | D2     | D3     | D4    |
|---------------|-------|--------|--------|-------|
| Abs. baseline | 0.002 | -0.002 | -0.008 | 0.002 |
| 0 s           | 0.825 | 1.386  | 0.735  | 0.778 |
| 1 s           | 0.537 | 0.103  | 0.567  | 0.755 |
| 2 s           | 0.276 | 0.861  | 0.413  | 0.726 |
| 3 s           | 0.129 | 0.644  | 0.291  | 0.710 |
| 4 s           | 0.066 | 0.533  | 0.211  | 0.696 |
| 5 s           | 0.032 | 0.367  | 0.158  | 0.687 |
| 10 s          | 0.012 | 0.133  | 0.041  | 0.676 |
| 15 s          | 0.010 | 0.033  | 0.015  | 0.662 |
| 30 s          | 0.011 | 0.009  | 0.006  | 0.617 |
| 60 s          | 0.010 | 0.007  | 0.007  | 0.597 |
| 120 s         | 0.010 | 0.007  | 0.006  | 0.567 |
| 180 s         | 0.010 | 0.008  | 0.005  | 0.556 |
| 300 s         | 0.010 | 0.008  | 0.007  | 0.540 |
| 600 s         | 0.010 | 0.008  | 0.005  | --    |
| 1200 s        | 0.010 | 0.007  | 0.005  | 0.508 |
| 1800 s        | 0.010 | 0.006  | 0.005  | 0.485 |

**Table S6. Raw data of kinetic testing.** Kinetics of D1-D4 (Abs. peak) under the irradiation of 520 nm at 30 cm.

| 520 nm 30 cm  | D1     | D2     | D3     | D4     |
|---------------|--------|--------|--------|--------|
| Abs. baseline | -0.042 | -0.015 | -0.004 | -0.004 |
| 0 s           | 0.849  | 1.478  | 0.677  | 0.563  |
| 1 s           | 0.800  | 1.417  | 0.645  | 0.555  |
| 2 s           | 0.740  | 1.357  | 0.603  | 0.551  |
| 3 s           | 0.698  | 1.293  | 0.574  | 0.548  |
| 4 s           | 0.648  | 1.233  | 0.547  | 0.544  |
| 5 s           | 0.593  | 1.176  | 0.521  | 0.542  |
| 10 s          | 0.497  | 1.024  | 0.456  | 0.530  |
| 15 s          | 0.383  | 0.875  | 0.387  | 0.530  |
| 30 s          | 0.201  | 0.517  | 0.244  | 0.512  |
| 60 s          | 0.055  | 0.156  | 0.093  | 0.485  |
| 120 s         | -0.006 | 0.018  | 0.040  | 0.479  |
| 180 s         | --     | 0.010  | 0.029  | 0.474  |
| 300 s         | -0.025 | 0.009  | 0.027  | 0.469  |
| 600 s         | -0.037 | 0.007  | 0.023  | 0.462  |
| 1200 s        | -0.036 | 0.008  | 0.024  | 0.466  |
| 1800 s        | -0.037 | 0.008  | 0.023  | 0.447  |

**Table S7. Raw data of kinetic testing.** Kinetics of D1-D4 (Abs. peak) under the irradiation of 520 nm at 50 cm.

| 520 nm 50 cm  | D1    | D2    | D3    | D4    |
|---------------|-------|-------|-------|-------|
| Abs. baseline | 0.006 | 0.001 | 0.000 | 0.000 |
| 0 s           | 0.819 | 1.854 | 0.700 | 0.482 |
| 1 s           | 0.801 | 1.819 | 0.683 | 0.479 |
| 2 s           | 0.777 | --    | 0.667 | 0.477 |
| 3 s           | 0.757 | 1.778 | 0.654 | 0.473 |
| 4 s           | 0.731 | 1.808 | 0.637 | 0.472 |
| 5 s           | 0.712 | 1.720 | 0.630 | 0.473 |
| 10 s          | 0.664 | 1.621 | 0.607 | 0.470 |
| 15 s          | 0.609 | 1.534 | 0.574 | 0.469 |
| 30 s          | 0.466 | 1.342 | 0.492 | 0.461 |
| 60 s          | 0.293 | 1.039 | 0.378 | 0.454 |
| 120 s         | 0.121 | 0.561 | 0.217 | 0.449 |
| 180 s         | 0.073 | 0.300 | 0.138 | 0.449 |
| 300 s         | 0.056 | 0.097 | 0.083 | 0.449 |
| 600 s         | 0.049 | 0.049 | 0.049 | 0.440 |
| 1200 s        | 0.051 | 0.045 | --    | 0.440 |
| 1800 s        | 0.048 | 0.046 | 0.051 | 0.440 |

**Table S8. Raw data of kinetic testing.** Kinetics of D1-D4 (Abs. peak) under the irradiation of 520 nm at 75 cm.

| 520 nm 75 cm  | D1    | D2    | D3    | D4    |
|---------------|-------|-------|-------|-------|
| Abs. baseline | 0.000 | 0.000 | 0.002 | 0.003 |
| 0 s           | 1.241 | 1.497 | 0.491 | 0.549 |
| 1 s           | --    | --    | 0.473 | --    |
| 2 s           | --    | --    | 0.466 | --    |
| 3 s           | --    | --    | 0.458 | --    |
| 4 s           | --    | --    | 0.452 | --    |
| 5 s           | 1.120 | 1.066 | 0.448 | 0.548 |
| 10 s          | 1.056 | 0.901 | 0.440 | 0.547 |
| 15 s          | 0.987 | 0.724 | 0.430 | 0.545 |
| 30 s          | 0.778 | 0.483 | 0.403 | 0.541 |
| 60 s          | 0.630 | 0.177 | 0.354 | 0.538 |
| 120 s         | 0.396 | 0.057 | 0.279 | 0.535 |
| 180 s         | 0.271 | 0.052 | 0.218 | 0.531 |
| 300 s         | 0.188 | 0.052 | 0.151 | 0.531 |
| 600 s         | 0.159 | 0.054 | 0.080 | 0.529 |
| 1200 s        | 0.148 | 0.055 | 0.057 | 0.530 |
| 1800 s        | 0.148 | 0.053 | 0.055 | 0.529 |

**Table S9. Raw data of kinetic testing.** Kinetics of D1-D4 (Abs. peak) under the irradiation of 520 nm at 100 cm.

| 520 nm 100 cm | D1     | D2    | D3    | D4     |
|---------------|--------|-------|-------|--------|
| Abs. baseline | -0.004 | 0.000 | 0.009 | -0.002 |
| 0 s           | 0.844  | 1.462 | 0.712 | 0.844  |
| 1 s           | 0.832  | 1.449 | 0.696 | 0.840  |
| 2 s           | 0.826  | 1.438 | 0.690 | 0.840  |
| 3 s           | 0.816  | 1.430 | 0.690 | 0.838  |
| 4 s           | 0.808  | 1.415 | 0.681 | 0.839  |
| 5 s           | 0.799  | 1.400 | 0.675 | 0.839  |
| 10 s          | 0.785  | 1.368 | 0.665 | 0.836  |
| 15 s          | 0.766  | 1.342 | 0.653 | 0.838  |
| 30 s          | 0.719  | 1.291 | 0.629 | 0.837  |
| 60 s          | 0.633  | 1.190 | 0.577 | 0.836  |
| 120 s         | 0.499  | 1.020 | 0.485 | 0.833  |
| 180 s         | 0.396  | 0.876 | 0.420 | 0.829  |
| 300 s         | 0.265  | 0.623 | 0.320 | 0.823  |
| 600 s         | 0.187  | 0.273 | 0.217 | 0.821  |
| 1200 s        | 0.172  | 0.118 | 0.177 | 0.817  |
| 1800 s        | 0.168  | 0.103 | 0.152 | 0.814  |

**Table S10. Raw data of kinetic testing.** Kinetics of D1-D4 (Abs. peak) under the irradiation of 520 nm at 200 cm.

| 520 nm 200 cm | D1    | D2    | D3     | D4    |
|---------------|-------|-------|--------|-------|
| Abs. baseline | 0.000 | 0.000 | -0.004 | 0.005 |
| 0 s           | 0.584 | 1.426 | 0.480  | 0.560 |
| 1 s           | 0.582 | 1.423 | 0.478  | --    |
| 2 s           | 0.580 | 1.424 | 0.476  | --    |
| 3 s           | 0.579 | 1.429 | 0.473  | --    |
| 4 s           | 0.577 | 1.422 | 0.471  | --    |
| 5 s           | 0.576 | 1.414 | 0.470  | 0.559 |
| 10 s          | 0.573 | 1.409 | 0.468  | 0.558 |
| 15 s          | 0.569 | 1.404 | 0.466  | 0.558 |
| 30 s          | 0.560 | 1.388 | 0.459  | 0.557 |
| 60 s          | 0.539 | 1.361 | 0.450  | 0.557 |
| 120 s         | 0.505 | 1.316 | 0.420  | 0.557 |
| 180 s         | 0.474 | 1.271 | 0.411  | 0.556 |
| 300 s         | 0.421 | 1.189 | 0.385  | 0.557 |
| 600 s         | 0.326 | 0.985 | 0.316  | 0.556 |
| 1200 s        | 0.258 | 0.706 | 0.251  | 0.555 |
| 1800 s        | 0.207 | 0.511 | 0.215  | 0.554 |

**Table S11. Raw data of kinetic testing.** Kinetics of D1-D4 (Abs. peak) under the irradiation of 590 nm at 5 cm.

| 590 nm 5 cm   | D1     | D2     | D3    | D4    |
|---------------|--------|--------|-------|-------|
| Abs. baseline | -0.003 | -0.004 | 0.000 | 0.000 |
| 0 s           | 0.589  | 1.329  | 0.475 | 1.559 |
| 1 s           | 0.437  | 1.063  | 0.248 | 1.383 |
| 2 s           | 0.337  | 0.811  | 0.107 | 1.162 |
| 3 s           | 0.281  | 0.554  | 0.036 | 0.890 |
| 4 s           | 0.227  | 0.405  | 0.018 | 0.753 |
| 5 s           | 0.178  | 0.273  | 0.007 | 0.639 |
| 10 s          | 0.094  | 0.089  | 0.001 | 0.520 |
| 15 s          | 0.046  | 0.025  | 0.000 | 0.386 |
| 30 s          | 0.008  | -0.003 | 0.000 | 0.287 |
| 60 s          | 0.003  | -0.004 | 0.000 | 0.278 |
| 120 s         | 0.003  | -0.004 | 0.000 | 0.257 |
| 180 s         | 0.003  | -0.004 | 0.000 | 0.259 |
| 300 s         | 0.003  | -0.004 | 0.000 | 0.259 |
| 600 s         | 0.002  | -0.004 | 0.000 | 0.257 |
| 1200 s        | 0.001  | -0.004 | 0.000 | 0.259 |
| 1800 s        | 0.001  | -0.004 | 0.000 | 0.259 |



**Table S12. Raw data of kinetic testing.** Kinetics of D1-D4 (Abs. peak) under the irradiation of 590 nm at 10 cm.

| 590 nm 10 cm  | D1    | D2     | D3     | D4    |
|---------------|-------|--------|--------|-------|
| Abs. baseline | 0.010 | -0.002 | -0.009 | 0.002 |
| 0 s           | 0.828 | 1.424  | 0.681  | 0.717 |
| 1 s           | 0.766 | 1.255  | 0.428  | 0.602 |
| 2 s           | 0.713 | 0.965  | 0.248  | 0.526 |
| 3 s           | 0.608 | 0.717  | 0.127  | 0.471 |
| 4 s           | 0.545 | 0.428  | 0.062  | 0.423 |
| 5 s           | 0.484 | 0.318  | 0.031  | 0.417 |
| 10 s          | 0.368 | 0.076  | 0.003  | 0.322 |
| 15 s          | 0.267 | 0.026  | 0.003  | 0.307 |
| 30 s          | 0.104 | 0.007  | 0.002  | 0.228 |
| 60 s          | 0.041 | 0.006  | 0.001  | 0.206 |
| 120 s         | 0.033 | 0.005  | 0.001  | 0.199 |
| 180 s         | 0.034 | 0.005  | 0.001  | 0.194 |
| 300 s         | 0.031 | 0.005  | 0.001  | --    |
| 600 s         | 0.031 | 0.005  | 0.003  | 0.164 |
| 1200 s        | 0.031 | 0.006  | 0.001  | 0.150 |
| 1800 s        | 0.031 | 0.005  | 0.001  | 0.147 |

**Table S13. Raw data of kinetic testing.** Kinetics of D1-D4 (Abs. peak) under the irradiation of 590 nm at 30 cm.

| 590 nm 30 cm  | D1    | D2     | D3     | D4     |
|---------------|-------|--------|--------|--------|
| Abs. baseline | 0.001 | -0.008 | -0.006 | -0.004 |
| 0 s           | 0.810 | 1.392  | 0.687  | 0.524  |
| 1 s           | 0.789 | 1.335  | 0.632  | 0.501  |
| 2 s           | 0.767 | 1.277  | 0.576  | 0.483  |
| 3 s           | 0.748 | 1.216  | 0.523  | 0.468  |
| 4 s           | 0.721 | 1.157  | 0.473  | 0.458  |
| 5 s           | 0.698 | 1.085  | 0.433  | 0.450  |
| 10 s          | 0.653 | 0.903  | 0.351  | 0.422  |
| 15 s          | 0.595 | 0.694  | 0.260  | 0.404  |
| 30 s          | 0.473 | 0.421  | 0.119  | 0.358  |
| 60 s          | 0.292 | 0.043  | 0.025  | 0.326  |
| 120 s         | 0.149 | 0.002  | 0.010  | 0.316  |
| 180 s         | 0.101 | 0.001  | 0.010  | 0.304  |
| 300 s         | 0.075 | 0.001  | 0.009  | 0.302  |
| 600 s         | 0.065 | 0.001  | 0.010  | 0.297  |
| 1200 s        | 0.055 | 0.000  | 0.008  | 0.284  |
| 1800 s        | 0.056 | 0.001  | 0.009  | 0.273  |

**Table S14. Raw data of kinetic testing.** Kinetics of D1-D4 (Abs. peak) under the irradiation of 590 nm at 50 cm.

| 590 nm 50 cm  | D1    | D2     | D3     | D4    |
|---------------|-------|--------|--------|-------|
| Abs. baseline | 0.006 | -0.001 | -0.005 | 0.000 |
| 0 s           | 0.811 | 1.395  | 0.684  | 0.472 |
| 1 s           | 0.798 | 1.348  | 0.634  | 0.461 |
| 2 s           | 0.785 | 1.291  | 0.593  | 0.453 |
| 3 s           | 0.775 | 1.273  | 0.553  | 0.446 |
| 4 s           | 0.762 | 1.238  | 0.519  | 0.440 |
| 5 s           | 0.749 | 1.190  | 0.484  | 0.437 |
| 10 s          | 0.728 | 1.092  | 0.407  | 0.422 |
| 15 s          | 0.699 | 0.978  | 0.325  | 0.411 |
| 30 s          | 0.639 | 0.731  | 0.213  | 0.385 |
| 60 s          | 0.517 | 0.365  | 0.071  | 0.365 |
| 120 s         | 0.363 | 0.061  | 0.015  | 0.336 |
| 180 s         | 0.285 | 0.016  | 0.013  | 0.349 |
| 300 s         | 0.182 | 0.012  | 0.013  | 0.348 |
| 600 s         | 0.123 | 0.012  | 0.014  | 0.338 |
| 1200 s        | 0.119 | 0.011  | 0.015  | 0.344 |
| 1800 s        | 0.113 | 0.011  | 0.013  | 0.328 |

**Table S15. Raw data of kinetic testing.** Kinetics of D1-D4 (Abs. peak) under the irradiation of 590 nm at 75 cm.

| 590 nm 75 cm  | D1    | D2    | D3     | D4    |
|---------------|-------|-------|--------|-------|
| Abs. baseline | 0.000 | 0.000 | -0.003 | 0.003 |
| 0 s           | 1.245 | 1.490 | 0.466  | 0.547 |
| 1 s           | --    | --    | 0.448  | --    |
| 2 s           | --    | --    | 0.435  | --    |
| 3 s           | --    | --    | 0.415  | --    |
| 4 s           | --    | --    | 0.396  | --    |
| 5 s           | 1.183 | 1.271 | 0.381  | 0.531 |
| 10 s          | 1.166 | 1.167 | 0.351  | 0.519 |
| 15 s          | 1.146 | 1.045 | 0.315  | 0.506 |
| 30 s          | 1.106 | 0.782 | 0.248  | 0.492 |
| 60 s          | 1.019 | 0.392 | 0.147  | 0.475 |
| 120 s         | 0.866 | 0.068 | 0.059  | 0.458 |
| 180 s         | 0.758 | 0.020 | 0.029  | 0.455 |
| 300 s         | 0.591 | 0.016 | 0.019  | 0.454 |
| 600 s         | 0.416 | 0.016 | 0.015  | 0.448 |
| 1200 s        | 0.353 | 0.015 | 0.015  | 0.467 |
| 1800 s        | 0.311 | 0.015 | 0.015  | 0.459 |

**Table S16. Raw data of kinetic testing.** Kinetics of D1-D4 (Abs. peak) under the irradiation of 590 nm at 100 cm.

| 590 nm 100 cm | D1     | D2    | D3    | D4    |
|---------------|--------|-------|-------|-------|
| Abs. baseline | -0.007 | 0.000 | -0.01 | 0.001 |
| 0 s           | 0.808  | 1.531 | 0.712 | 0.837 |
| 1 s           | 0.803  | 1.514 | 0.689 | 0.829 |
| 2 s           | 0.799  | 1.505 | 0.673 | 0.823 |
| 3 s           | 0.794  | 1.492 | 0.657 | 0.816 |
| 4 s           | 0.792  | 1.482 | 0.640 | 0.811 |
| 5 s           | 0.788  | 1.469 | 0.627 | 0.807 |
| 10 s          | 0.781  | 1.443 | 0.592 | 0.805 |
| 15 s          | 0.775  | 1.410 | 0.566 | 0.801 |
| 30 s          | 0.757  | 1.320 | 0.492 | 0.781 |
| 60 s          | 0.711  | 1.166 | 0.361 | 0.766 |
| 120 s         | 0.635  | 0.859 | 0.212 | 0.759 |
| 180 s         | 0.575  | 0.601 | 0.106 | 0.750 |
| 300 s         | --     | 0.253 | 0.051 | 0.749 |
| 480 s         | 0.406  | --    | --    | --    |
| 600 s         | 0.377  | 0.044 | 0.047 | 0.745 |
| 1200 s        | 0.322  | 0.034 | 0.047 | 0.745 |
| 1800 s        | 0.275  | 0.033 | 0.043 | 0.745 |

**Table S17. Raw data of kinetic testing.** Kinetics of D1-D4 (Abs. peak) under the irradiation of 590 nm at 200 cm.

| 590 nm 200 cm | D1    | D2    | D3     | D4    |
|---------------|-------|-------|--------|-------|
| Abs. baseline | 0.000 | 0.000 | -0.005 | 0.006 |
| 0 s           | 1.241 | 1.404 | 0.478  | 0.557 |
| 1 s           | --    | 1.398 | 0.474  | --    |
| 2 s           | --    | 1.391 | 0.471  | --    |
| 3 s           | --    | 1.385 | 0.467  | --    |
| 4 s           | --    | 1.378 | 0.465  | --    |
| 5 s           | 1.223 | 1.372 | 0.461  | 0.554 |
| 10 s          | 1.214 | 1.366 | 0.455  | 0.553 |
| 15 s          | 1.209 | 1.356 | 0.447  | 0.552 |
| 30 s          | 1.192 | 1.329 | 0.430  | 0.548 |
| 60 s          | 1.159 | 1.291 | 0.395  | 0.546 |
| 120 s         | 1.107 | 1.211 | 0.327  | 0.543 |
| 180 s         | 1.061 | 1.149 | 0.269  | 0.542 |
| 300 s         | 0.979 | 1.004 | 0.191  | 0.541 |
| 600 s         | 0.844 | 0.654 | 0.094  | 0.541 |
| 1200 s        | 0.742 | 0.213 | 0.051  | 0.535 |
| 1800 s        | 0.666 | 0.087 | 0.042  | 0.534 |

**Table S18. Raw data of kinetic testing.** Kinetics of D1-D4 (Abs. peak) under the irradiation of 620 nm at 5 cm.

| 620 nm 5 cm   | D1    | D2     | D3     | D4    |
|---------------|-------|--------|--------|-------|
| Abs. baseline | 0.000 | -0.004 | -0.003 | 0.000 |
| 0 s           | 0.563 | 1.349  | 0.468  | 1.557 |
| 1 s           | 0.553 | 1.233  | 0.163  | 0.971 |
| 2 s           | 0.465 | 1.112  | 0.037  | 0.474 |
| 3 s           | 0.452 | 0.974  | 0.008  | 0.331 |
| 4 s           | 0.444 | 0.861  | 0.001  | 0.302 |
| 5 s           | 0.434 | 0.756  | 0.000  | 0.282 |
| 10 s          | 0.411 | 0.561  | -0.001 | 0.243 |
| 15 s          | 0.389 | 0.394  | -0.001 | 0.252 |
| 30 s          | 0.337 | 0.164  | -0.002 | 0.248 |
| 60 s          | 0.261 | 0.022  | -0.002 | 0.241 |
| 120 s         | 0.162 | 0.000  | -0.003 | 0.245 |
| 180 s         | 0.102 | 0.000  | -0.003 | 0.233 |
| 300 s         | 0.064 | 0.000  | -0.003 | 0.233 |
| 600 s         | 0.042 | -0.001 | -0.003 | 0.233 |
| 1200 s        | 0.042 | -0.001 | -0.003 | 0.233 |
| 1800 s        | 0.040 | -0.001 | -0.003 | 0.233 |

**Table S19. Raw data of kinetic testing.** Kinetics of D1-D4 (Abs. peak) under the irradiation of 620 nm at 10 cm.

| 620 nm 10 cm  | D1    | D2     | D3     | D4     |
|---------------|-------|--------|--------|--------|
| Abs. baseline | 0.003 | -0.009 | -0.009 | 0.001  |
| 0 s           | 0.823 | 1.353  | 0.712  | 0.662  |
| 1 s           | 0.807 | 1.237  | 0.305  | 0.225  |
| 2 s           | 0.791 | 1.109  | 0.069  | 0.073  |
| 3 s           | 0.773 | 0.969  | 0.018  | 0.069  |
| 4 s           | 0.757 | 0.855  | 0.006  | 0.071  |
| 5 s           | 0.743 | 0.758  | 0.004  | 0.075  |
| 10 s          | 0.701 | 0.504  | 0.001  | 0.053  |
| 15 s          | 0.655 | 0.340  | 0.002  | 0.056  |
| 30 s          | 0.517 | 0.083  | 0.002  | 0.049  |
| 60 s          | 0.419 | 0.011  | 0.000  | 0.057  |
| 120 s         | 0.264 | 0.006  | 0.001  | -0.002 |
| 180 s         | 0.181 | 0.006  | 0.000  | 0.046  |
| 300 s         | 0.126 | 0.005  | 0.000  | 0.047  |
| 600 s         | 0.107 | 0.005  | 0.001  | 0.046  |
| 1200 s        | 0.100 | 0.005  | 0.001  | 0.046  |
| 1800 s        | 0.100 | 0.005  | 0.000  | 0.046  |

**Table S20. Raw data of kinetic testing.** Kinetics of D1-D4 (Abs. peak) under the irradiation of 620 nm at 30 cm.

| 620 nm 30 cm  | D1    | D2     | D3     | D4     |
|---------------|-------|--------|--------|--------|
| Abs. baseline | 0.000 | -0.014 | -0.005 | -0.004 |
| 0 s           | 0.826 | 1.483  | 0.687  | 0.507  |
| 1 s           | 0.822 | 1.423  | 0.521  | 0.407  |
| 2 s           | 0.819 | 1.368  | 0.356  | 0.353  |
| 3 s           | 0.815 | 1.319  | 0.239  | 0.311  |
| 4 s           | 0.810 | 1.276  | 0.164  | 0.292  |
| 5 s           | 0.808 | 1.224  | 0.103  | 0.276  |
| 10 s          | 0.798 | 1.103  | 0.029  | 0.218  |
| 15 s          | 0.791 | 0.986  | 0.014  | 0.195  |
| 30 s          | 0.769 | 0.712  | 0.001  | --     |
| 60 s          | 0.725 | 0.289  | 0.001  | 0.129  |
| 120 s         | 0.659 | 0.048  | 0.002  | 0.117  |
| 180 s         | 0.602 | 0.020  | 0.001  | 0.122  |
| 300 s         | 0.514 | 0.017  | 0.000  | 0.117  |
| 600 s         | 0.411 | 0.014  | 0.001  | 0.108  |
| 1200 s        | 0.372 | 0.013  | 0.000  | 0.107  |
| 1800 s        | 0.353 | 0.013  | 0.000  | 0.107  |

**Table S21. Raw data of kinetic testing.** Kinetics of D1-D4 (Abs. peak) under the irradiation of 620 nm at 50 cm.

| 620 nm 50 cm  | D1    | D2    | D3     | D4     |
|---------------|-------|-------|--------|--------|
| Abs. baseline | 0.000 | 0.002 | -0.005 | -0.008 |
| 0 s           | 0.819 | 1.440 | 0.691  | 0.463  |
| 1 s           | 0.814 | 1.419 | 0.557  | 0.415  |
| 2 s           | 0.812 | 1.383 | 0.474  | 0.372  |
| 3 s           | 0.811 | 1.365 | 0.404  | 0.341  |
| 4 s           | 0.809 | 1.344 | 0.338  | --     |
| 5 s           | 0.808 | 1.311 | 0.276  | 0.313  |
| 10 s          | 0.803 | 1.243 | 0.157  | 0.276  |
| 15 s          | 0.800 | 1.160 | 0.082  | 0.249  |
| 30 s          | 0.790 | 1.016 | 0.017  | 0.197  |
| 60 s          | 0.770 | 0.774 | 0.005  | 0.171  |
| 120 s         | 0.739 | 0.417 | 0.003  | 0.152  |
| 180 s         | 0.711 | 0.216 | 0.003  | 0.159  |
| 300 s         | 0.662 | 0.078 | 0.003  | 0.141  |
| 600 s         | 0.581 | 0.039 | 0.003  | 0.140  |
| 1200 s        | 0.520 | 0.037 | 0.003  | 0.140  |
| 1800 s        | 0.474 | 0.038 | 0.003  | 0.141  |

**Table S22. Raw data of kinetic testing.** Kinetics of D1-D4 (Abs. peak) under the irradiation of 620 nm at 75 cm.

| 620 nm 75 cm  | D1    | D2    | D3    | D4    |
|---------------|-------|-------|-------|-------|
| Abs. baseline | 0.000 | 0.000 | 0.000 | 0.003 |
| 0 s           | 1.288 | 1.492 | 1.189 | 0.549 |
| 1 s           | --    | --    | --    | --    |
| 2 s           | --    | --    | --    | --    |
| 3 s           | --    | --    | --    | --    |
| 4 s           | --    | --    | --    | --    |
| 5 s           | 1.271 | 1.104 | 0.690 | 0.500 |
| 10 s          | 1.271 | 0.941 | 0.522 | 0.469 |
| 15 s          | 1.245 | 0.802 | 0.376 | 0.450 |
| 30 s          | 1.241 | 0.447 | 0.139 | 0.370 |
| 60 s          | 1.223 | 0.172 | 0.048 | 0.326 |
| 120 s         | 1.187 | 0.079 | 0.036 | 0.306 |
| 180 s         | 1.158 | 0.065 | 0.037 | 0.299 |
| 300 s         | 1.113 | 0.071 | 0.033 | 0.295 |
| 600 s         | 1.044 | 0.071 | 0.033 | 0.293 |
| 1200 s        | 0.978 | 0.061 | 0.033 | 0.288 |
| 1800 s        | 0.966 | 0.065 | 0.033 | 0.286 |

**Table S23. Raw data of kinetic testing.** Kinetics of D1-D4 (Abs. peak) under the irradiation of 620 nm at 100 cm.

| 620 nm 100 cm | D1     | D2    | D3     | D4    |
|---------------|--------|-------|--------|-------|
| Abs. baseline | -0.007 | 0.000 | -0.009 | 0.001 |
| 0 s           | 0.804  | 1.403 | 0.713  | 0.830 |
| 1 s           | 0.803  | 1.397 | 0.672  | 0.806 |
| 2 s           | 0.803  | 1.395 | 0.632  | 0.786 |
| 3 s           | 0.805  | 1.379 | 0.596  | 0.770 |
| 4 s           | 0.805  | 1.367 | 0.560  | 0.758 |
| 5 s           | 0.805  | 1.360 | 0.524  | 0.745 |
| 10 s          | 0.806  | 1.334 | 0.445  | 0.713 |
| 15 s          | 0.804  | 1.315 | 0.377  | 0.701 |
| 30 s          | 0.801  | 1.244 | 0.204  | 0.655 |
| 60 s          | 0.797  | 1.146 | 0.070  | 0.608 |
| 120 s         | 0.793  | 0.980 | 0.025  | 0.578 |
| 180 s         | 0.783  | 0.817 | 0.018  | 0.573 |
| 300 s         | 0.769  | 0.578 | 0.021  | 0.555 |
| 600 s         | 0.748  | 0.259 | 0.021  | 0.553 |
| 1200 s        | 0.721  | 0.120 | 0.016  | 0.552 |
| 1800 s        | 0.711  | 0.107 | 0.019  | 0.552 |

**Table S24. Raw data of kinetic testing.** Kinetics of D1-D4 (Abs. peak) under the irradiation of 620 nm at 200 cm.

| 620 nm 200 cm | D1    | D2    | D3    | D4    |
|---------------|-------|-------|-------|-------|
| Abs. baseline | 0.000 | 0.000 | 0.000 | 0.006 |
| 0 s           | 1.282 | 1.403 | 1.192 | 0.555 |
| 1 s           | --    | 1.392 | --    | --    |
| 2 s           | --    | 1.387 | --    | --    |
| 3 s           | --    | 1.381 | --    | --    |
| 4 s           | --    | 1.374 | --    | --    |
| 5 s           | 1.277 | 1.369 | 1.052 | 0.546 |
| 10 s          | 1.275 | 1.351 | 0.994 | 0.539 |
| 15 s          | 1.275 | 1.357 | 0.951 | 0.532 |
| 30 s          | 1.275 | 1.341 | 0.829 | 0.522 |
| 60 s          | 1.274 | 1.308 | 0.613 | 0.508 |
| 120 s         | 1.271 | 1.261 | 0.367 | 0.498 |
| 180 s         | 1.264 | 1.204 | 0.192 | 0.496 |
| 300 s         | 1.259 | 1.092 | 0.102 | 0.495 |
| 600 s         | 1.248 | 0.909 | 0.095 | 0.491 |
| 1200 s        | 1.235 | 0.621 | 0.095 | 0.489 |
| 1800 s        | 1.231 | 0.432 | 0.089 | 0.488 |

**Table S25. Raw data of kinetic testing.** Kinetics of D1-D4 (Abs. peak) under the irradiation of 660 nm at 5 cm.

| 660 nm 5 cm   | D1    | D2     | D3     | D4    |
|---------------|-------|--------|--------|-------|
| Abs. baseline | 0.000 | -0.004 | -0.003 | 0.000 |
| 0 s           | 0.538 | 1.360  | 0.462  | 1.522 |
| 1 s           | 0.540 | 1.349  | 0.354  | 0.692 |
| 2 s           | 0.535 | 1.333  | 0.288  | 0.117 |
| 3 s           | 0.534 | 1.322  | 0.227  | 0.065 |
| 4 s           | 0.532 | 1.307  | 0.167  | 0.072 |
| 5 s           | 0.531 | 1.294  | 0.130  | 0.070 |
| 10 s          | 0.529 | 1.260  | 0.062  | 0.021 |
| 15 s          | 0.525 | 1.240  | 0.029  | 0.053 |
| 30 s          | 0.519 | 1.170  | 0.003  | 0.074 |
| 60 s          | 0.505 | 1.033  | 0.001  | 0.056 |
| 120 s         | 0.479 | 0.800  | 0.001  | 0.060 |
| 180 s         | 0.457 | 0.623  | 0.000  | 0.057 |
| 300 s         | 0.417 | 0.378  | 0.000  | 0.057 |
| 600 s         | 0.349 | 0.126  | 0.000  | 0.057 |
| 1200 s        | 0.274 | 0.052  | 0.000  | 0.057 |
| 1800 s        | 0.244 | 0.048  | 0.000  | 0.057 |

**Table S26. Raw data of kinetic testing.** Kinetics of D1-D4 (Abs. peak) under the irradiation of 660 nm at 10 cm.

| 660 nm 10 cm  | D1    | D2     | D3    | D4    |
|---------------|-------|--------|-------|-------|
| Abs. baseline | 0.002 | -0.002 | -0.01 | 0.002 |
| 0 s           | 0.829 | 1.434  | 0.683 | 0.660 |
| 1 s           | 0.824 | 1.396  | 0.550 | 0.094 |
| 2 s           | 0.823 | 1.381  | 0.467 | 0.093 |
| 3 s           | 0.823 | 1.377  | 0.374 | 0.050 |
| 4 s           | 0.823 | 1.136  | 0.296 | 0.048 |
| 5 s           | 0.818 | 1.351  | 0.227 | 0.062 |
| 10 s          | 0.818 | 1.315  | 0.104 | 0.047 |
| 15 s          | 0.801 | 1.281  | 0.048 | 0.040 |
| 30 s          | 0.798 | 1.180  | 0.008 | 0.037 |
| 60 s          | 0.786 | 0.980  | 0.004 | 0.045 |
| 120 s         | 0.763 | 0.694  | 0.005 | 0.045 |
| 180 s         | 0.744 | 0.499  | 0.004 | 0.043 |
| 300 s         | 0.714 | 0.278  | 0.005 | 0.038 |
| 600 s         | 0.669 | 0.114  | 0.005 | 0.043 |
| 1200 s        | 0.625 | 0.093  | 0.005 | 0.039 |
| 1800 s        | 0.617 | 0.092  | 0.005 | 0.038 |

**Table S27. Raw data of kinetic testing.** Kinetics of D1-D4 (Abs. peak) under the irradiation of 660 nm at 30 cm.

| 660 nm 30 cm  | D1     | D2     | D3     | D4     |
|---------------|--------|--------|--------|--------|
| Abs. baseline | -0.002 | -0.014 | -0.004 | -0.004 |
| 0 s           | 0.813  | 1.467  | 0.653  | 0.500  |
| 1 s           | 0.812  | 1.450  | 0.596  | 0.381  |
| 2 s           | 0.811  | 1.440  | 0.540  | 0.285  |
| 3 s           | 0.810  | 1.431  | 0.500  | 0.245  |
| 4 s           | 0.810  | 1.428  | 0.471  | 0.207  |
| 5 s           | 0.810  | 1.422  | 0.455  | 0.190  |
| 10 s          | 0.809  | 1.401  | 0.360  | 0.084  |
| 15 s          | 0.809  | 1.382  | 0.285  | 0.105  |
| 30 s          | 0.807  | 1.351  | 0.114  | 0.083  |
| 60 s          | 0.805  | 1.270  | 0.025  | 0.083  |
| 120 s         | 0.800  | 1.148  | 0.015  | 0.082  |
| 180 s         | 0.796  | 1.026  | 0.013  | --     |
| 300 s         | 0.788  | 0.831  | 0.014  | --     |
| 600 s         | 0.775  | 0.510  | 0.014  | 0.086  |
| 1200 s        | 0.760  | 0.281  | 0.014  | 0.079  |
| 1800 s        | 0.755  | 0.221  | 0.014  | 0.079  |



**Table S28. Raw data of kinetic testing.** Kinetics of D1-D4 (Abs. peak) under the irradiation of 660 nm at 50 cm.

| 660 nm 50 cm  | D1    | D2    | D3    | D4     |
|---------------|-------|-------|-------|--------|
| Abs. baseline | 0.005 | 0.000 | 0.000 | -0.008 |
| 0 s           | 0.815 | 1.445 | 1.198 | 0.462  |
| 1 s           | 0.814 | 1.443 | --    | 0.398  |
| 2 s           | 0.814 | 1.437 | --    | 0.352  |
| 3 s           | 0.813 | 1.440 | --    | 0.309  |
| 4 s           | 0.813 | 1.439 | --    | 0.277  |
| 5 s           | 0.813 | 1.434 | 0.925 | 0.261  |
| 10 s          | 0.812 | 1.428 | 0.812 | 0.215  |
| 15 s          | 0.812 | 1.423 | 0.691 | 0.169  |
| 30 s          | 0.812 | 1.411 | 0.441 | 0.142  |
| 60 s          | 0.812 | 1.377 | 0.177 | 0.127  |
| 120 s         | 0.811 | 1.300 | 0.085 |        |
| 180 s         | 0.809 | 1.228 | 0.065 | 0.110  |
| 300 s         | 0.804 | 1.119 | 0.062 | 0.112  |
| 600 s         | 0.799 | 0.885 | 0.055 | 0.117  |
| 1200 s        | 0.793 | 0.610 | 0.057 | 0.111  |
| 1800 s        | 0.791 | 0.471 | 0.055 | 0.112  |

**Table S29. Raw data of kinetic testing.** Kinetics of D1-D4 (Abs. peak) under the irradiation of 660 nm at 75 cm.

| 660 nm 75 cm  | D1    | D2     | D3     | D4    |
|---------------|-------|--------|--------|-------|
| Abs. baseline | 0.000 | -0.005 | -0.004 | 0.003 |
| 0 s           | 1.271 | 1.352  | 0.462  | 0.547 |
| 1 s           | --    | 1.347  | 0.450  | --    |
| 2 s           | --    | 1.345  | 0.441  | --    |
| 3 s           | --    | 1.338  | 0.431  | --    |
| 4 s           | --    | 1.336  | 0.416  | --    |
| 5 s           | 1.271 | 1.331  | 0.404  | 0.462 |
| 10 s          | 1.271 | 1.325  | 0.375  | 0.409 |
| 15 s          | 1.271 | 1.321  | 0.355  | 0.366 |
| 30 s          | 1.270 | 1.314  | 0.205  | 0.297 |
| 60 s          | 1.268 | 1.306  | 0.218  | 0.249 |
| 120 s         | 1.267 | 1.288  | 0.138  | 0.223 |
| 180 s         | 1.264 | 1.261  | 0.090  | 0.219 |
| 300 s         | 1.260 | 1.211  | 0.048  | 0.211 |
| 600 s         | 1.254 | 1.083  | 0.024  | --    |
| 1200 s        | 1.246 | 0.905  | 0.025  | 0.209 |
| 1800 s        | 1.243 | 0.774  | 0.024  | 0.210 |

**Table S30. Raw data of kinetic testing.** Kinetics of D1-D4 (Abs. peak) under the irradiation of 660 nm at 100 cm.

| 660 nm 100 cm | D1     | D2    | D3     | D4    |
|---------------|--------|-------|--------|-------|
| Abs. baseline | -0.001 | 0.003 | -0.006 | 0.001 |
| 0 s           | 0.834  | 1.503 | 0.702  | 0.833 |
| 1 s           | 0.831  | --    | 0.687  | 0.791 |
| 2 s           | 0.831  | 1.496 | 0.676  | 0.758 |
| 3 s           | 0.830  | 1.508 | 0.669  | 0.728 |
| 4 s           | 0.830  | 1.492 | 0.657  | 0.706 |
| 5 s           | 0.829  | 1.481 | 0.648  | 0.670 |
| 10 s          | 0.830  | 1.486 | 0.626  | 0.657 |
| 15 s          | 0.831  | 1.483 | 0.605  | 0.639 |
| 30 s          | 0.831  | 1.463 | 0.550  | 0.580 |
| 60 s          | 0.831  | 1.453 | 0.458  | 0.502 |
| 120 s         | 0.832  | 1.428 | 0.311  | 0.496 |
| 180 s         | 0.831  | 1.412 | 0.237  | 0.495 |
| 300 s         | 0.832  | 1.368 | 0.161  | 0.456 |
| 600 s         | 0.831  | 1.272 | 0.102  | 0.458 |
| 1200 s        | 0.829  | 1.142 | 0.081  | 0.456 |
| 1800 s        | 0.828  | 1.050 | 0.073  | 0.456 |

**Table S31. Raw data of kinetic testing.** Kinetics of D1-D4 (Abs. peak) under the irradiation of 660 nm at 200 cm.

| 660 nm 200 cm | D1     | D2    | D3     | D4    |
|---------------|--------|-------|--------|-------|
| Abs. baseline | -0.008 | 0.007 | -0.003 | 0.006 |
| 0 s           | 0.584  | 1.423 | 0.487  | 0.555 |
| 1 s           | 0.583  | 1.421 | 0.484  | --    |
| 2 s           | 0.583  | 1.417 | 0.481  | --    |
| 3 s           | 0.582  | 1.413 | 0.478  | --    |
| 4 s           | 0.582  | 1.412 | 0.476  | --    |
| 5 s           | 0.582  | 1.408 | 0.472  | 0.540 |
| 10 s          | 0.582  | 1.410 | 0.467  | 0.528 |
| 15 s          | 0.582  | 1.410 | 0.462  | 0.517 |
| 30 s          | 0.583  | 1.417 | 0.450  | 0.500 |
| 60 s          | 0.583  | 1.413 | 0.431  | 0.481 |
| 120 s         | 0.584  | 1.407 | 0.391  | 0.466 |
| 180 s         | 0.584  | 1.403 | 0.352  | 0.460 |
| 300 s         | 0.584  | 1.400 | 0.294  | 0.449 |
| 600 s         | 0.584  | 1.368 | 0.208  | 0.452 |
| 1200 s        | 0.583  | 1.329 | 0.115  | 0.446 |
| 1800 s        | 0.582  | 1.284 | 0.088  | 0.445 |

**Table S32. linear content (%) at PSS.** Fitted *linear* content (%) at equilibrium and R-square corresponding to 28 irradiation conditions.

| Conditions    | <i>linear</i> content (%) / R-square |       |        |       |        |       |        |       |
|---------------|--------------------------------------|-------|--------|-------|--------|-------|--------|-------|
|               | D1                                   |       | D2     |       | D3     |       | D4     |       |
| dark          | 100.00                               | -     | 100.00 | -     | 100.00 | -     | 100.00 | -     |
| 520 nm 5 cm   | 0.55                                 | 0.999 | 0.31   | 0.994 | 0.57   | 0.997 | 18.84  | 0.996 |
| 520 nm 10 cm  | 0.46                                 | 0.993 | 0.89   | 0.711 | 1.83   | 0.999 | 67.91  | 0.930 |
| 520 nm 30 cm  | 2.18                                 | 0.996 | 1.37   | 0.999 | 4.56   | 0.998 | 82.56  | 0.974 |
| 520 nm 50 cm  | 5.55                                 | 0.999 | 2.08   | 0.999 | 7.72   | 0.999 | 92.01  | 0.959 |
| 520 nm 75 cm  | 13.21                                | 0.995 | 4.01   | 0.993 | 11.52  | 0.998 | 96.47  | 0.989 |
| 520 nm 100 cm | 20.28                                | 0.999 | 6.04   | 0.998 | 22.13  | 0.999 | 96.63  | 0.966 |
| 520 nm 200 cm | 34.46                                | 0.999 | 10.11  | 0.999 | 40.90  | 0.997 | 99.25  | 0.747 |
| 590 nm 5 cm   | 1.83                                 | 0.995 | 0.02   | 0.997 | 0.00   | 0.997 | 17.70  | 0.988 |
| 590 nm 10 cm  | 3.19                                 | 0.995 | 0.06   | 0.989 | 1.16   | 0.997 | 26.20  | 0.968 |
| 590 nm 30 cm  | 8.16                                 | 0.998 | 0.29   | 0.999 | 2.67   | 0.995 | 57.20  | 0.980 |
| 590 nm 50 cm  | 14.20                                | 0.999 | 0.30   | 0.999 | 3.21   | 0.995 | 72.30  | 0.984 |
| 590 nm 75 cm  | 26.58                                | 0.998 | 0.46   | 0.999 | 4.59   | 0.996 | 83.44  | 0.979 |
| 590 nm 100 cm | 36.79                                | 0.998 | 0.50   | 0.998 | 7.34   | 0.998 | 89.40  | 0.977 |
| 590 nm 200 cm | 53.44                                | 0.998 | 6.09   | 0.998 | 9.85   | 0.999 | 96.45  | 0.916 |
| 620 nm 5 cm   | 8.77                                 | 0.975 | 1.12   | 0.994 | 0.00   | 0.999 | 15.14  | 0.991 |
| 620 nm 10 cm  | 13.24                                | 0.996 | 1.39   | 0.998 | 0.93   | 0.995 | 16.63  | 0.996 |
| 620 nm 30 cm  | 43.44                                | 0.999 | 1.52   | 0.999 | 0.89   | 0.998 | 24.41  | 0.974 |
| 620 nm 50 cm  | 57.77                                | 0.997 | 2.33   | 0.999 | 1.78   | 0.997 | 33.92  | 0.975 |
| 620 nm 75 cm  | 74.89                                | 0.994 | 4.66   | 0.997 | 3.25   | 0.995 | 53.27  | 0.996 |
| 620 nm 100 cm | 87.31                                | 0.998 | 6.89   | 0.999 | 4.11   | 0.998 | 67.66  | 0.983 |
| 620 nm 200 cm | 95.78                                | 0.990 | 13.11  | 0.998 | 7.38   | 0.997 | 88.51  | 0.990 |
| 660 nm 5 cm   | 42.37                                | 0.999 | 3.63   | 0.999 | 1.31   | 0.998 | 3.12   | 0.986 |
| 660 nm 10 cm  | 74.39                                | 0.994 | 6.26   | 0.988 | 2.37   | 0.999 | 6.81   | 0.993 |
| 660 nm 30 cm  | 92.49                                | 0.998 | 14.49  | 0.999 | 2.70   | 0.997 | 17.41  | 0.994 |
| 660 nm 50 cm  | 96.77                                | 0.989 | 23.18  | 0.999 | 5.15   | 0.998 | 27.44  | 0.987 |
| 660 nm 75 cm  | 97.79                                | -     | 30.75  | 0.998 | 9.65   | 0.975 | 39.31  | 0.996 |
| 660 nm 100 cm | 99.33                                | -     | 61.66  | 0.996 | 13.18  | 0.998 | 56.70  | 0.965 |
| 660 nm 200 cm | 99.81                                | 0.112 | 99.67  | 0.956 | 17.04  | 0.999 | 81.01  | 0.956 |

## 9. Concentration-dependence of D1-D4

DASAs are negative photochromic molecules switching from colored to colorless under exposing to light. This improves the penetration of light into the sample during the photoisomerization. Previous research reported the isomerization of DASAs is interrelated with the concentration. In the solutions with high concentration, neighboring molecules interact electronically and form delocalized excited states (excitons) with different reactivities. Steric interactions prevent the nuclear motions necessary for the isomerization. Therefore, the photoisomerization of DASAs is limited with the increase of concentration.

The concentration-dependence of DASAs is important for the simulation of color accuracy of SAP materials under light irradiation. The kinetics for the light-induced *linear-to-cyclic* isomerization of DASA solutions with the initial absorbance of 1, 6 and 25 (the corresponding concentrations are  $3.2 \times 10^{-5}$  M,  $1.9 \times 10^{-4}$  M and  $8.2 \times 10^{-4}$  M, respectively) were studied. A cuvette with the optical path of 1 mm was used for the measurement of the DASA solutions with the initial absorbance of 6 and 25 ( $A=0.6$  and  $2.5$ ).

For all the DASAs, the concentration-dependence is not that obvious. Actually, increasing the concentration results in slightly higher *linear* content at equilibrium in some cases (**Fig. S18**). These might be attributed to the narrowly-distributed concentration of DASA solutions, which is much lower than the previous research ( $1 \times 10^{-2}$  M). Therefore, under the same irradiation condition, the DASA solutions with the initial absorbance ranged between 1 and 25 show similar *linear* content at equilibrium.

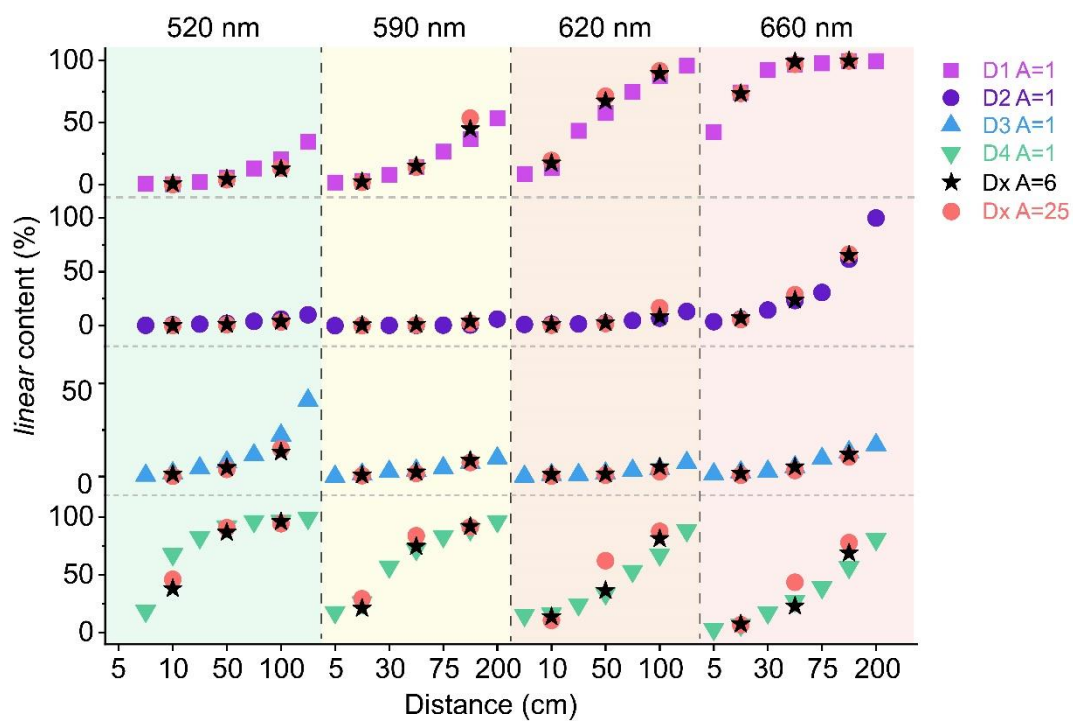

**Fig. S18. Equilibrium *linear* content (%) at different concentrations.** Equilibrium *linear* content (%) of DASA (D1-D4) solutions with the initial absorbance at 1, 6 and 25 under light irradiation.

## 10. Optimization of SAP materials

**Table S33. Concentration coefficients of different strategies.** The concentration of color-contributing units of A2, A4, A6, A8, R6 and R8.

| Mode | Concentration ( $\mu\text{M}$ ) |       |       |       |       |       |       |       |
|------|---------------------------------|-------|-------|-------|-------|-------|-------|-------|
|      | a                               | b     | c     | d     | e     | f     | g     | h     |
| A2   | 0.00                            | 0.00  | 0.00  | 20.02 | 0.00  | 0.00  | 0.00  | 13.01 |
| A4   | 36.08                           | 0.00  | 15.81 | 0.00  | 37.24 | 0.00  | 0.00  | 13.01 |
| A6   | 36.08                           | 38.52 | 15.81 | 0.00  | 37.24 | 29.89 | 0.00  | 13.01 |
| A8   | 36.08                           | 38.52 | 15.81 | 20.02 | 37.24 | 29.89 | 25.30 | 13.01 |
| R6   | 28.86                           | 38.52 | 9.48  | 0.00  | 29.80 | 19.43 | 0.00  | 15.61 |
| R8   | 41.49                           | 63.56 | 4.74  | 33.03 | 50.28 | 23.91 | 20.24 | 24.72 |

**Table S34. Color coordinates of different strategies.**  $L^*$ ,  $a^*$ ,  $b^*$  values of A2, A4, A6, A8, R6 and R8.

| Spectra Label | $L^*$    | $a^*$    | $b^*$    |
|---------------|----------|----------|----------|
| A2            | 74.89535 | -10.1044 | 19.35718 |
| A4            | 57.03506 | -4.40115 | 4.61268  |
| A6            | 54.62911 | -20.8554 | 11.15192 |
| A8            | 48.82071 | -9.5412  | 8.76253  |
| R6            | 52.80483 | -33.9646 | 8.34636  |
| R8            | 41.77479 | -3.06623 | 4.28341  |

**Table S35. Color coordinates of A4 strategy at different concentrations.**  $L^*$ ,  $a^*$ ,  $b^*$  values of A4 solutions with the initial absorbance between 0.5 and 50.

| Maximum Abs. | $a^*$    | $b^*$    | $L^*$   |
|--------------|----------|----------|---------|
| A=0.5        | 75.07314 | -2.12194 | 3.15197 |
| A=1          | 57.03506 | -4.40115 | 4.61268 |
| A=2          | 33.54306 | -7.48394 | 4.48618 |
| A=4          | 10.35173 | -4.26569 | 1.57458 |
| A=6          | 2.48391  | 3.21932  | 0.47888 |
| A=8          | 0.97248  | 4.50548  | 0.62926 |
| A=10         | 0.60011  | 4.21131  | 0.71325 |
| A=25         | 0.22328  | 1.84109  | 0.38476 |
| A=50         | 0.08981  | 0.74071  | 0.15485 |

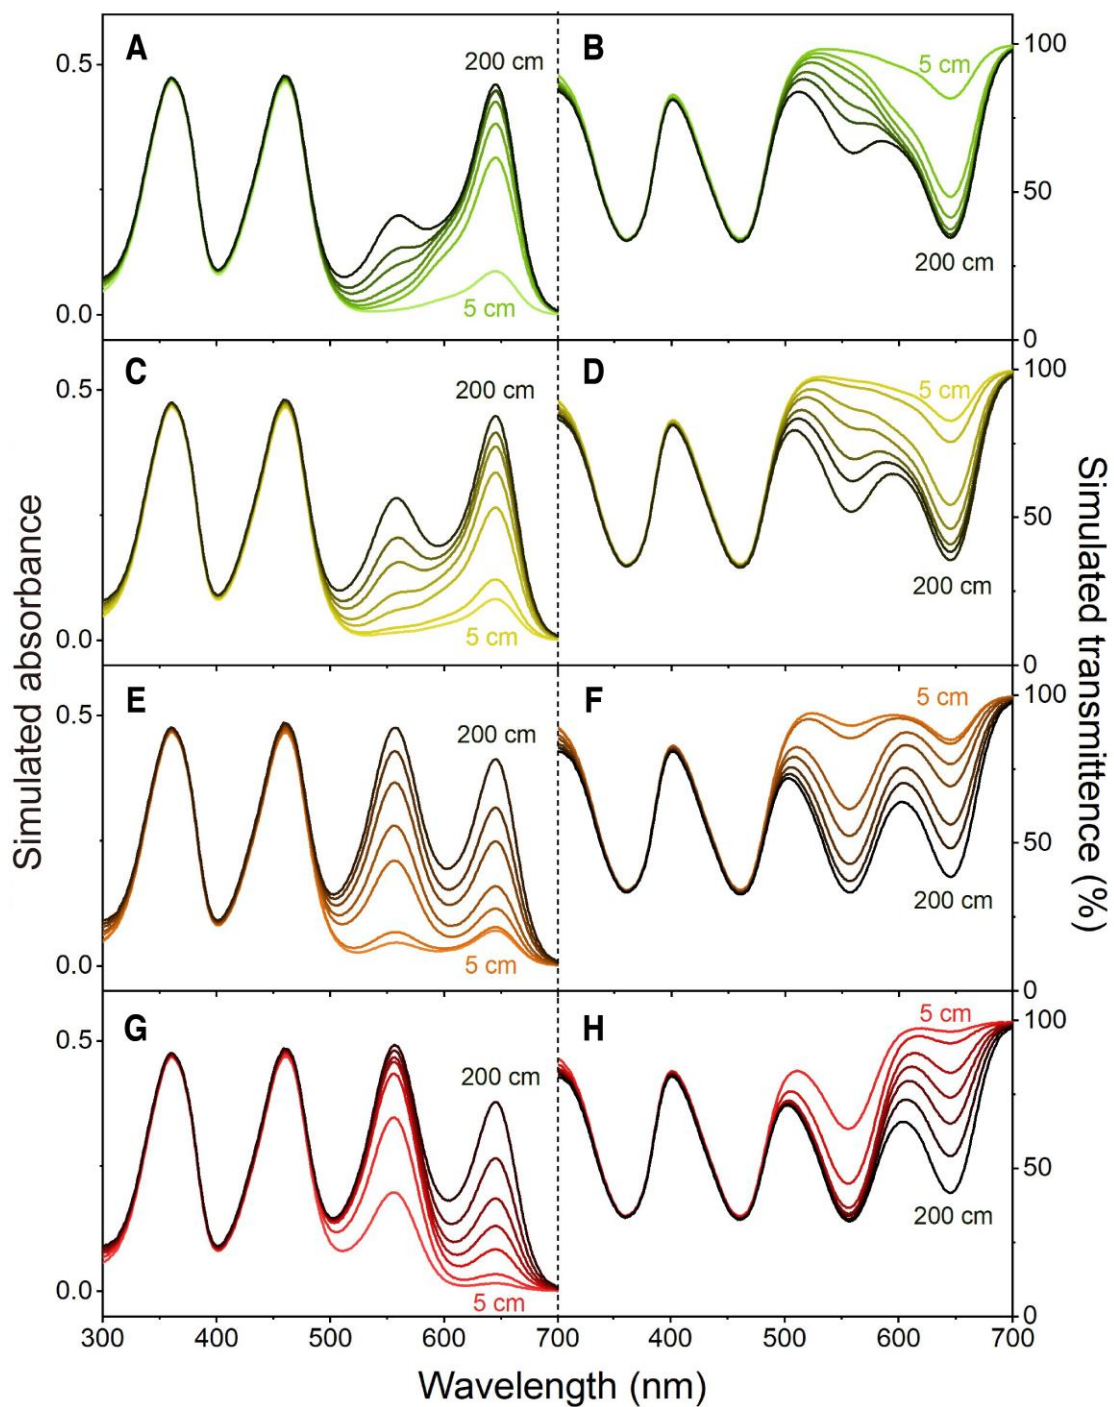

**Fig. S19. Absorption/transmission spectra with an initial absorbance of 0.5 under different light conditions.** Simulated absorption (left) and transmission (right) spectra of A4 solution (initial absorbance=0.5) under 520 (A and B), 590 (C and D), 620 (E and F) and 660 nm (G and H) irradiation at different distances.

**Table S36. Color coordinates with an initial absorbance of 0.5 under different light conditions.  $L^*$ ,  $a^*$ ,  $b^*$  values of A4 solution (initial absorbance=0.5) under light irradiation.**

| A=0.5         | $L^*$    | $a^*$     | $b^*$    |
|---------------|----------|-----------|----------|
| dark          | 75.07314 | -2.12194  | 3.15197  |
| 520 nm 5 cm   | 97.0253  | -15.56462 | 36.89632 |
| 520 nm 10 cm  | 93.96224 | -26.47936 | 32.26933 |
| 520 nm 30 cm  | 92.77143 | -28.76103 | 30.46895 |
| 520 nm 50 cm  | 91.55772 | -29.3839  | 28.61403 |
| 520 nm 75 cm  | 89.77196 | -27.61884 | 25.84587 |
| 520 nm 100 cm | 88.37894 | -25.30132 | 23.67483 |
| 520 nm 200 cm | 85.57901 | -21.19652 | 19.33071 |
| 590 nm 5 cm   | 96.83911 | -14.82592 | 36.6029  |
| 590 nm 10 cm  | 95.98795 | -16.38304 | 35.29506 |
| 590 nm 30 cm  | 93.01601 | -21.58228 | 30.75093 |
| 590 nm 50 cm  | 90.92026 | -22.63326 | 27.53673 |
| 590 nm 75 cm  | 87.90366 | -20.72631 | 22.88139 |
| 590 nm 100 cm | 85.69352 | -18.59274 | 19.47025 |
| 590 nm 200 cm | 82.40494 | -14.76511 | 14.40246 |
| 620 nm 5 cm   | 95.61002 | -11.72009 | 34.68013 |
| 620 nm 10 cm  | 94.62386 | -10.51759 | 33.14667 |
| 620 nm 30 cm  | 88.53384 | -2.32138  | 23.70789 |
| 620 nm 50 cm  | 85.48357 | -0.12288  | 19.01022 |
| 620 nm 75 cm  | 81.51561 | 0.52756   | 12.93028 |
| 620 nm 100 cm | 78.76583 | 0.92795   | 8.73598  |
| 620 nm 200 cm | 76.31358 | -1.0247   | 5.02179  |
| 660 nm 5 cm   | 90.24188 | 2.74223   | 26.33472 |
| 660 nm 10 cm  | 84.82114 | 11.63384  | 17.99585 |
| 660 nm 30 cm  | 81.41398 | 14.04873  | 12.7803  |
| 660 nm 50 cm  | 80.09337 | 12.72692  | 10.75699 |
| 660 nm 75 cm  | 79.12285 | 10.15916  | 9.27001  |
| 660 nm 100 cm | 77.75584 | 6.60946   | 7.18671  |
| 660 nm 200 cm | 76.1881  | 1.57348   | 4.81863  |



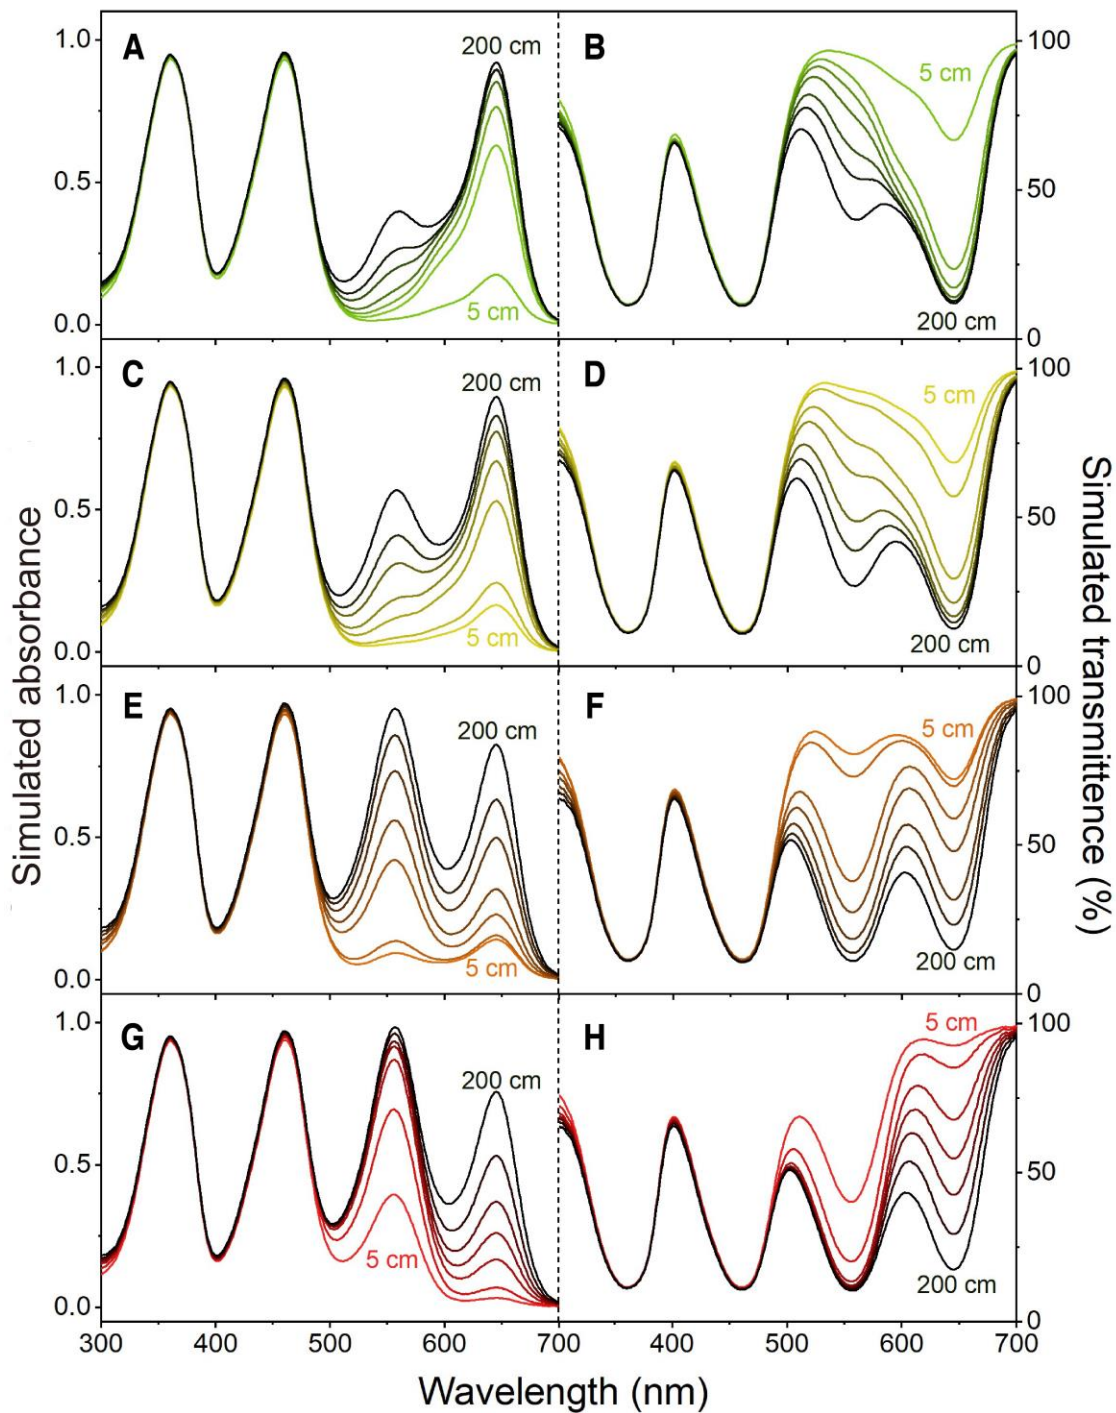

**Fig. S20. Absorption/transmission spectra with an initial absorbance of 1 under different light conditions.** Simulated absorption (left) and transmission (right) spectra of A4 solution (initial absorbance=1) under 520 (A and B), 590 (C and D), 620 (E and F) and 660 nm (G and H) irradiation at different distances.

**Table S37. Color coordinates with an initial absorbance of 1 under different light conditions.  $L^*$ ,  $a^*$ ,  $b^*$  values of A4 solution (initial absorbance=1) under light irradiation.**

| A=1           | $L^*$    | $a^*$     | $b^*$    |
|---------------|----------|-----------|----------|
| dark          | 57.03506 | -4.40115  | 4.61268  |
| 520 nm 5 cm   | 94.65263 | -24.4311  | 61.83168 |
| 520 nm 10 cm  | 89.18533 | -44.30581 | 53.43916 |
| 520 nm 30 cm  | 87.09005 | -47.93555 | 50.26089 |
| 520 nm 50 cm  | 84.86929 | -48.69153 | 46.87457 |
| 520 nm 75 cm  | 81.46732 | -45.43656 | 41.64382 |
| 520 nm 100 cm | 78.81972 | -41.41663 | 37.56469 |
| 520 nm 200 cm | 73.73675 | -34.38644 | 29.77546 |
| 590 nm 5 cm   | 94.26917 | -22.99731 | 61.24147 |
| 590 nm 10 cm  | 92.62597 | -26.06445 | 58.69034 |
| 590 nm 30 cm  | 87.10221 | -35.60965 | 50.18338 |
| 590 nm 50 cm  | 83.25402 | -37.26331 | 44.28999 |
| 590 nm 75 cm  | 77.74089 | -33.77146 | 35.84809 |
| 590 nm 100 cm | 73.82913 | -30.0953  | 29.87733 |
| 590 nm 200 cm | 68.25243 | -23.78045 | 21.40736 |
| 620 nm 5 cm   | 91.82399 | -17.02265 | 57.47678 |
| 620 nm 10 cm  | 89.91465 | -14.81275 | 54.53296 |
| 620 nm 30 cm  | 78.83804 | -0.57085  | 37.56708 |
| 620 nm 50 cm  | 73.62565 | 2.39678   | 29.62408 |
| 620 nm 75 cm  | 67.06282 | 2.02927   | 19.6581  |
| 620 nm 100 cm | 62.72742 | 1.69531   | 13.12966 |
| 620 nm 200 cm | 58.90555 | -2.31886  | 7.39502  |
| 660 nm 5 cm   | 82.22588 | 9.97279   | 42.89282 |
| 660 nm 10 cm  | 73.53113 | 23.93071  | 29.81149 |
| 660 nm 30 cm  | 68.13491 | 25.95726  | 21.66951 |
| 660 nm 50 cm  | 65.82836 | 22.69403  | 18.11595 |
| 660 nm 75 cm  | 63.99806 | 17.61047  | 15.25817 |
| 660 nm 100 cm | 61.54286 | 10.82369  | 11.46168 |
| 660 nm 200 cm | 58.83499 | 1.84641   | 7.31772  |

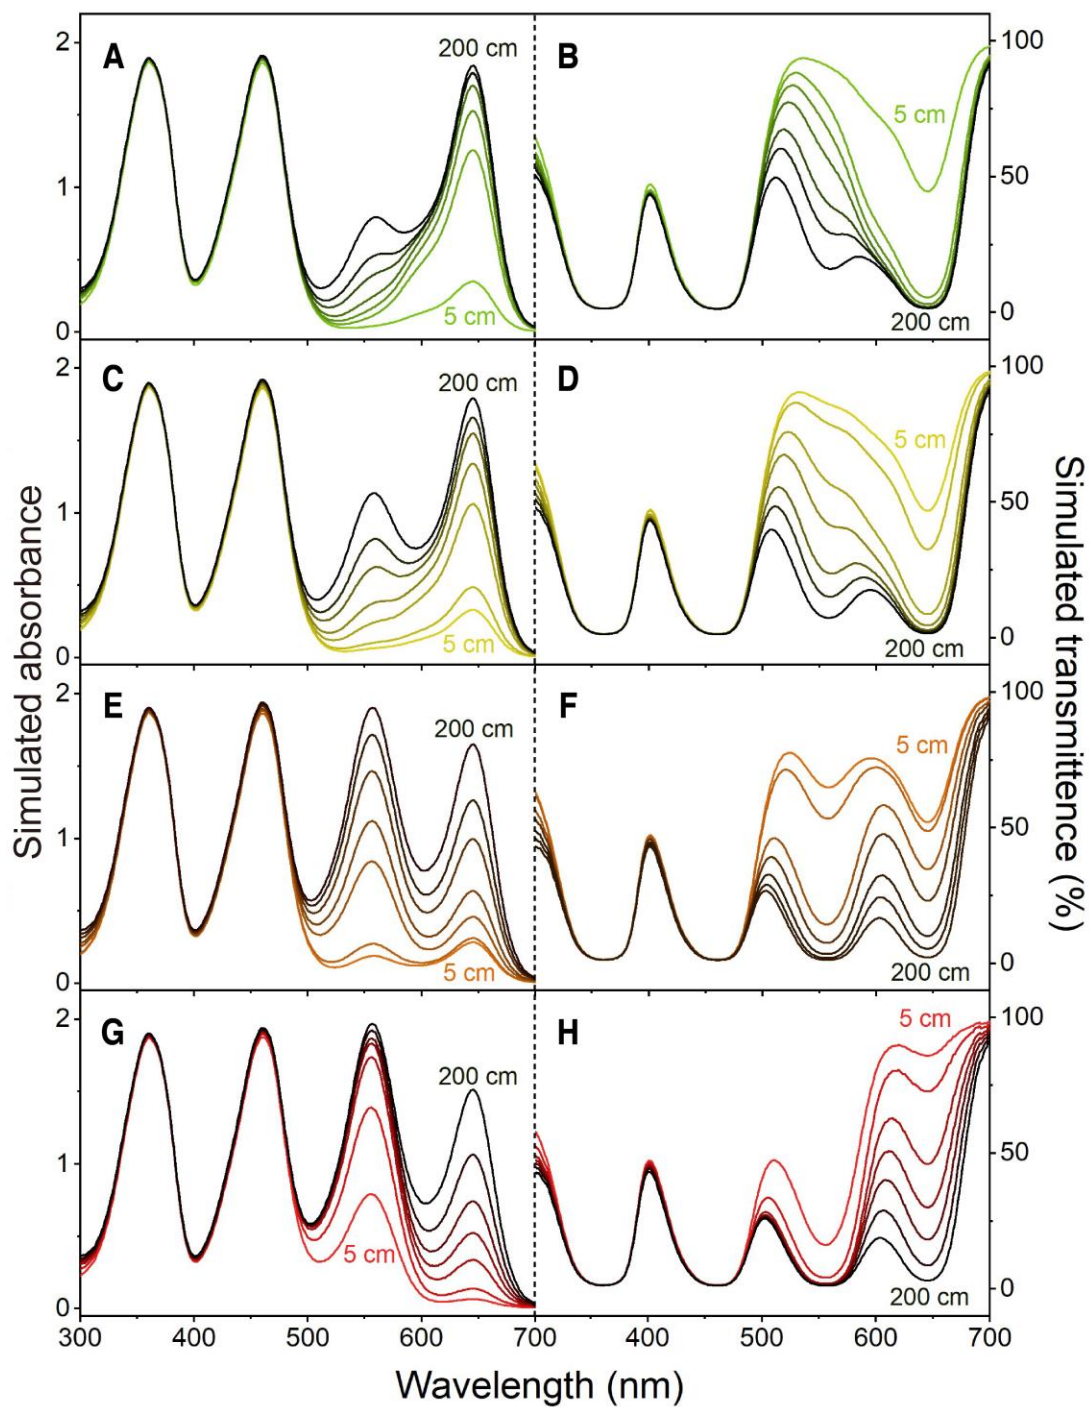

**Fig. S21. Absorption/transmission spectra with an initial absorbance of 2 under different light conditions.** Simulated absorption (left) and transmission (right) spectra of A4 solution (initial absorbance=2) under 520 (A and B), 590 (C and D), 620 (E and F) and 660 nm (G and H) irradiation at different distances.

**Table S38. Color coordinates with an initial absorbance of 2 under different light conditions.**  $L^*$ ,  $a^*$ ,  $b^*$  values of A4 solution (initial absorbance=2) under light irradiation.

| A=2           | $L^*$    | $a^*$     | $b^*$    |
|---------------|----------|-----------|----------|
| dark          | 33.54306 | -7.48394  | 4.48618  |
| 520 nm 5 cm   | 90.76922 | -34.07951 | 88.95433 |
| 520 nm 10 cm  | 81.83773 | -65.44605 | 74.95567 |
| 520 nm 30 cm  | 78.40418 | -69.79281 | 69.76876 |
| 520 nm 50 cm  | 74.54547 | -69.9798  | 63.98675 |
| 520 nm 75 cm  | 68.40643 | -64.46689 | 54.82248 |
| 520 nm 100 cm | 63.73161 | -58.30274 | 47.8722  |
| 520 nm 200 cm | 55.44656 | -47.70167 | 35.64644 |
| 590 nm 5 cm   | 89.96959 | -31.40048 | 87.78674 |
| 590 nm 10 cm  | 86.91632 | -36.8289  | 83.02727 |
| 590 nm 30 cm  | 77.27438 | -51.754   | 68.18295 |
| 590 nm 50 cm  | 70.69431 | -53.40563 | 58.26899 |
| 590 nm 75 cm  | 61.47423 | -47.34497 | 44.54661 |
| 590 nm 100 cm | 55.35045 | -41.66134 | 35.52191 |
| 590 nm 200 cm | 47.29282 | -32.55711 | 23.79358 |
| 620 nm 5 cm   | 85.17738 | -20.23848 | 80.71294 |
| 620 nm 10 cm  | 81.62667 | -16.2802  | 75.39524 |
| 620 nm 30 cm  | 63.3017  | 6.25317   | 48.30082 |
| 620 nm 50 cm  | 55.5609  | 8.7468    | 36.84844 |
| 620 nm 75 cm  | 46.27653 | 5.00647   | 23.07128 |
| 620 nm 100 cm | 40.62114 | 2.6167    | 14.80844 |
| 620 nm 200 cm | 35.76732 | -4.25507  | 7.68793  |
| 660 nm 5 cm   | 69.98155 | 26.94333  | 59.09042 |
| 660 nm 10 cm  | 58.58558 | 43.52817  | 42.97709 |
| 660 nm 30 cm  | 51.06499 | 41.36292  | 31.88803 |
| 660 nm 50 cm  | 47.21951 | 34.51791  | 25.87861 |
| 660 nm 75 cm  | 43.93175 | 25.83226  | 20.61401 |
| 660 nm 100 cm | 39.91541 | 14.76763  | 14.27848 |
| 660 nm 200 cm | 35.88793 | 1.2985    | 8.01722  |

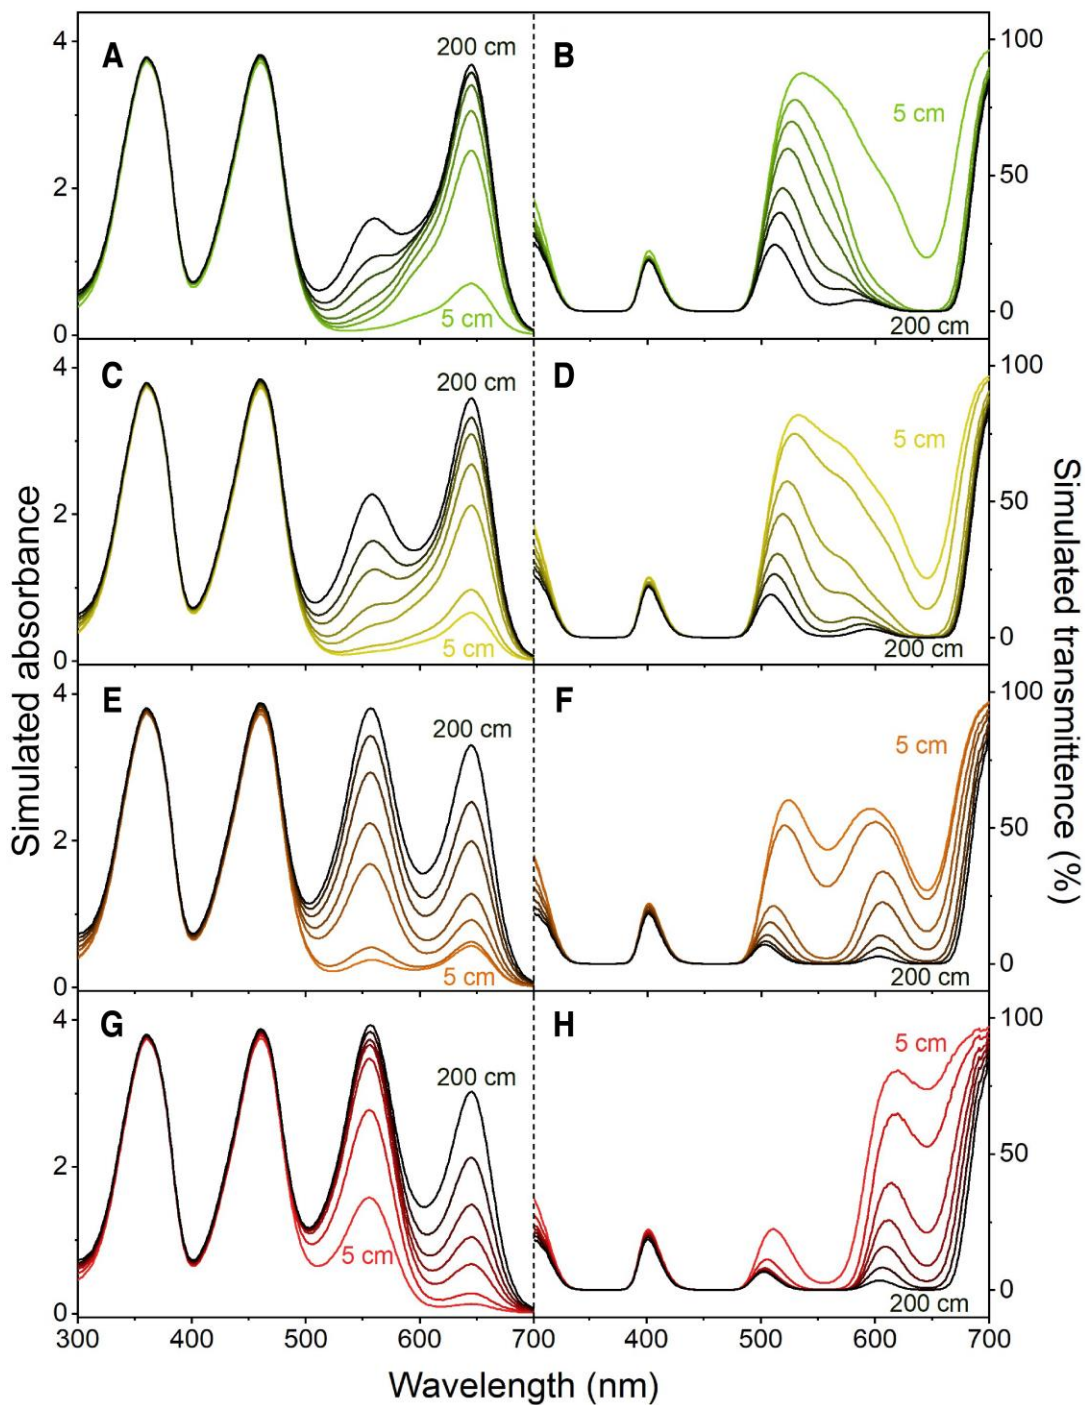

**Fig. S22. Absorption/transmission spectra with an initial absorbance of 4 under different light conditions.** Simulated absorption (left) and transmission (right) spectra of A4 solution (initial absorbance=4) under 520 (A and B), 590 (C and D), 620 (E and F) and 660 nm (G and H) irradiation at different distances.

**Table S39. Color coordinates with an initial absorbance of 4 under different light conditions.  $L^*$ ,  $a^*$ ,  $b^*$  values of A4 solution (initial absorbance=4) under light irradiation.**

| A=4           | $L^*$    | $a^*$     | $b^*$     |
|---------------|----------|-----------|-----------|
| dark          | 10.35173 | -4.26569  | 1.57458   |
| 520 nm 5 cm   | 84.53756 | -44.36714 | 104.50689 |
| 520 nm 10 cm  | 71.53315 | -82.94092 | 83.91686  |
| 520 nm 30 cm  | 66.25988 | -85.64412 | 76.17549  |
| 520 nm 50 cm  | 60.00699 | -83.7149  | 67.23499  |
| 520 nm 75 cm  | 50.08905 | -75.18851 | 53.33627  |
| 520 nm 100 cm | 43.03324 | -66.93844 | 43.60615  |
| 520 nm 200 cm | 32.07899 | -52.76493 | 28.7953   |
| 590 nm 5 cm   | 82.85833 | -39.68888 | 102.22184 |
| 590 nm 10 cm  | 77.53968 | -47.47474 | 94.05834  |
| 590 nm 30 cm  | 62.23115 | -64.6067  | 71.02492  |
| 590 nm 50 cm  | 52.23564 | -64.10813 | 56.65627  |
| 590 nm 75 cm  | 39.2022  | -54.23326 | 38.53466  |
| 590 nm 100 cm | 31.57958 | -46.10789 | 28.23431  |
| 590 nm 200 cm | 22.77055 | -33.71992 | 16.7154   |
| 620 nm 5 cm   | 73.78204 | -19.91748 | 89.71332  |
| 620 nm 10 cm  | 67.69332 | -13.13175 | 81.10233  |
| 620 nm 30 cm  | 42.06968 | 16.92728  | 45.99474  |
| 620 nm 50 cm  | 32.75679 | 16.39767  | 32.99184  |
| 620 nm 75 cm  | 22.22198 | 8.37611   | 17.96312  |
| 620 nm 100 cm | 16.58247 | 4.64911   | 10.14864  |
| 620 nm 200 cm | 12.14021 | -1.93332  | 3.94417   |
| 660 nm 5 cm   | 54.967   | 51.23757  | 67.3319   |
| 660 nm 10 cm  | 43.45168 | 60.31011  | 53.15164  |
| 660 nm 30 cm  | 33.30154 | 49.6715   | 38.11346  |
| 660 nm 50 cm  | 27.25942 | 39.36191  | 28.42505  |
| 660 nm 75 cm  | 22.13726 | 28.69148  | 20.03483  |
| 660 nm 100 cm | 16.76142 | 16.3651   | 11.40088  |
| 660 nm 200 cm | 12.34298 | 3.19616   | 4.48811   |

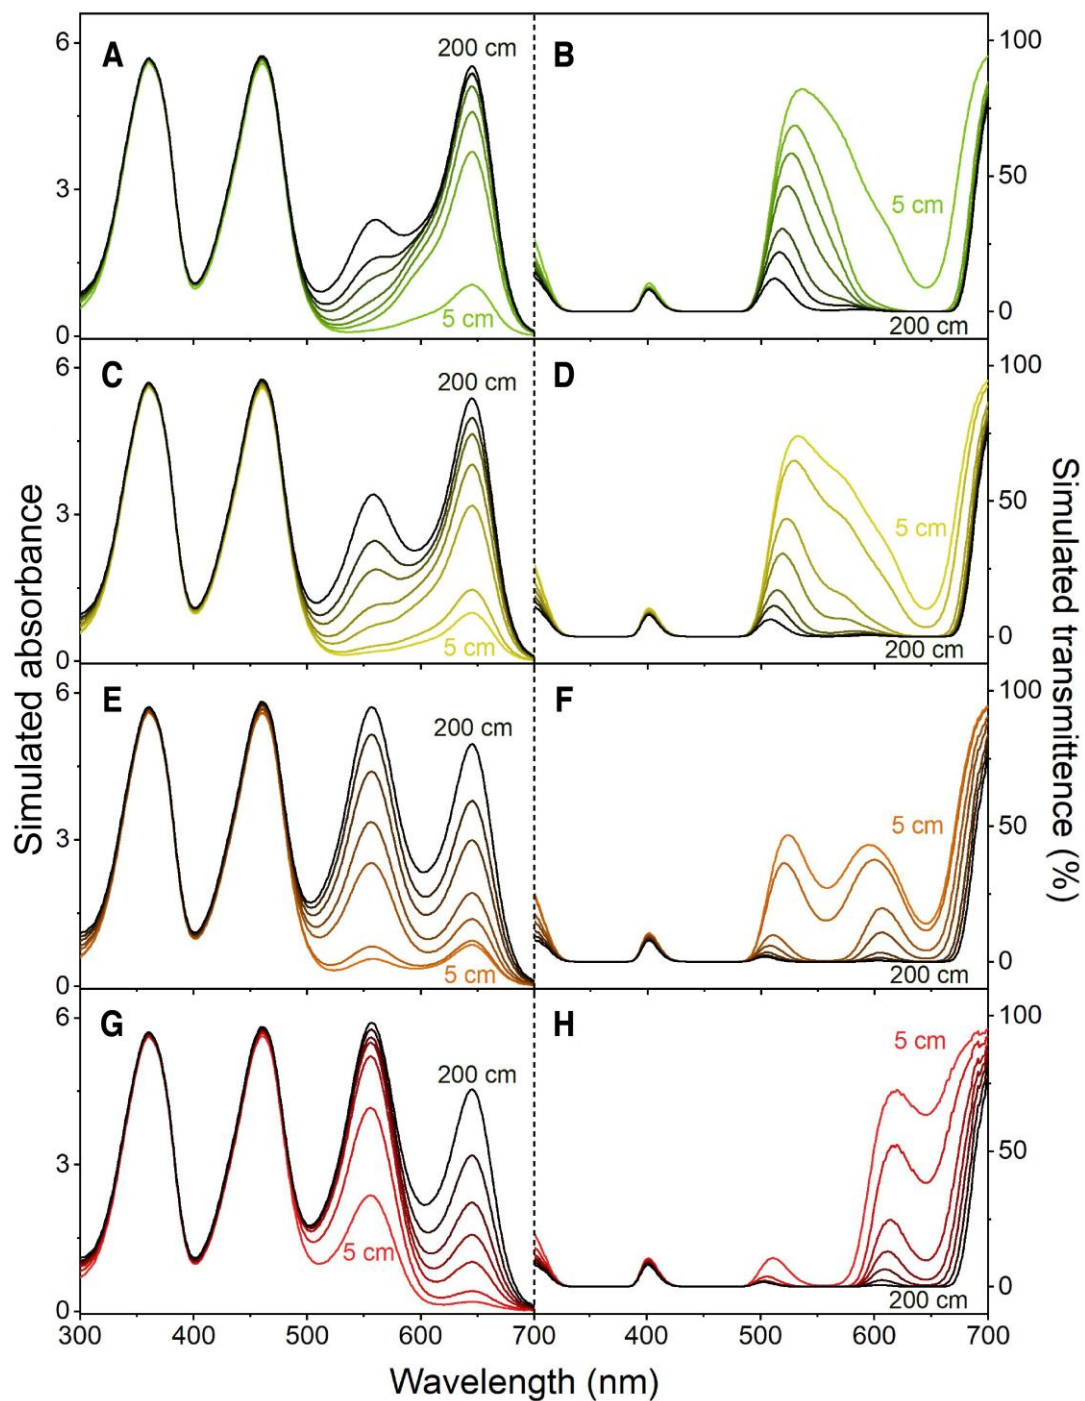

**Fig. S23. Absorption/transmission spectra with an initial absorbance of 6 under different light conditions.** Simulated absorption (left) and transmission (right) spectra of A4 solution (initial absorbance=6) under 520 (A and B), 590 (C and D), 620 (E and F) and 660 nm (G and H) irradiation at different distances.

**Table S40. Color coordinates with an initial absorbance of 6 under different light conditions.  $L^*$ ,  $a^*$ ,  $b^*$  values of A4 solution (initial absorbance=6) under light irradiation.**

| A=6           | $L^*$    | $a^*$     | $b^*$     |
|---------------|----------|-----------|-----------|
| dark          | 2.48391  | 3.21932   | 0.47888   |
| 520 nm 5 cm   | 79.38411 | -51.07352 | 105.909   |
| 520 nm 10 cm  | 64.01422 | -88.23282 | 81.76142  |
| 520 nm 30 cm  | 57.41187 | -88.59203 | 72.34982  |
| 520 nm 50 cm  | 49.5113  | -84.4614  | 61.47075  |
| 520 nm 75 cm  | 37.45775 | -73.37139 | 45.38754  |
| 520 nm 100 cm | 29.49242 | -63.48118 | 35.08134  |
| 520 nm 200 cm | 18.35927 | -45.70565 | 20.97242  |
| 590 nm 5 cm   | 76.80747 | -44.8878  | 102.49417 |
| 590 nm 10 cm  | 69.74517 | -53.14541 | 91.84855  |
| 590 nm 30 cm  | 50.82315 | -67.75254 | 64.09349  |
| 590 nm 50 cm  | 39.10699 | -64.40504 | 47.95853  |
| 590 nm 75 cm  | 25.02679 | -50.83763 | 29.58944  |
| 590 nm 100 cm | 17.63592 | -39.88707 | 20.10997  |
| 590 nm 200 cm | 9.83881  | -21.31425 | 9.83134   |
| 620 nm 5 cm   | 64.01041 | -18.41306 | 85.48357  |
| 620 nm 10 cm  | 56.18984 | -9.56219  | 74.8485   |
| 620 nm 30 cm  | 28.35704 | 21.52608  | 38.69787  |
| 620 nm 50 cm  | 19.09173 | 18.82368  | 25.31946  |
| 620 nm 75 cm  | 9.20514  | 11.05362  | 10.24575  |
| 620 nm 100 cm | 5.05326  | 7.45039   | 4.0259    |
| 620 nm 200 cm | 3.04438  | 3.81566   | 1.17242   |
| 660 nm 5 cm   | 46.57525 | 62.19121  | 69.29298  |
| 660 nm 10 cm  | 35.48719 | 62.50632  | 54.7742   |
| 660 nm 30 cm  | 23.25381 | 46.88323  | 34.99092  |
| 660 nm 50 cm  | 16.05145 | 35.94613  | 22.90965  |
| 660 nm 75 cm  | 10.33315 | 26.50086  | 13.24925  |
| 660 nm 100 cm | 5.41187  | 15.87302  | 5.03555   |
| 660 nm 200 cm | 3.11215  | 5.8879    | 1.35912   |



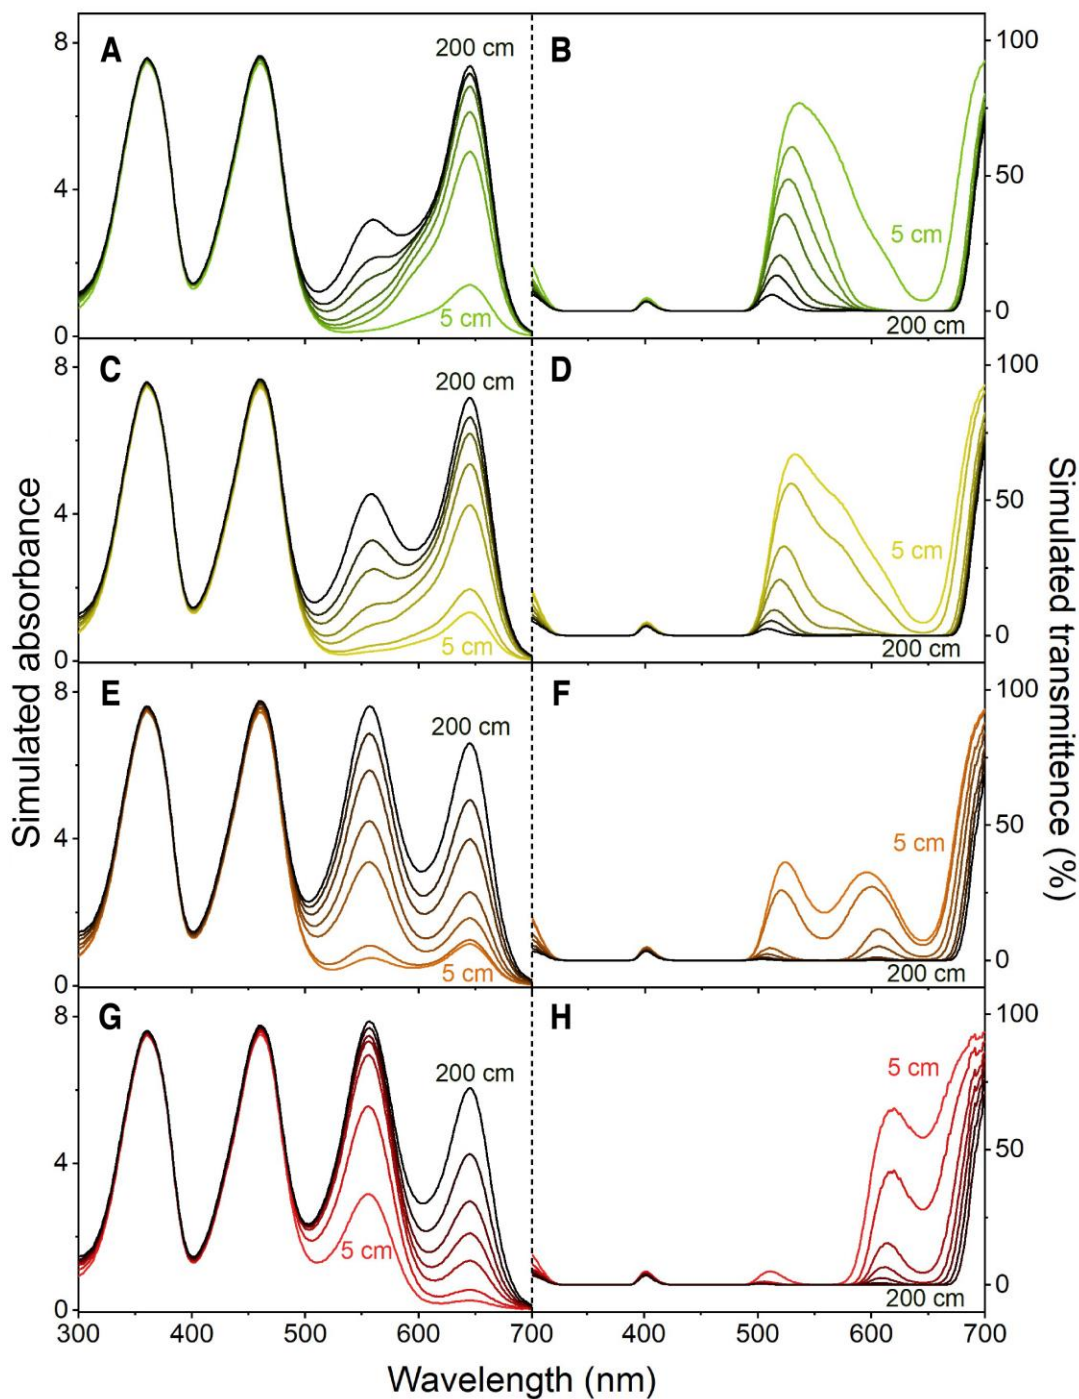

**Fig. S24. Absorption/transmission spectra with an initial absorbance of 8 under different light conditions.** Simulated absorption (left) and transmission (right) spectra of A4 solution (initial absorbance=8) under 520 (A and B), 590 (C and D), 620 (E and F) and 660 nm (G and H) irradiation at different distances.

**Table S41. Color coordinates with an initial absorbance of 8 under different light conditions.  $L^*$ ,  $a^*$ ,  $b^*$  values of A4 solution (initial absorbance=8) under light irradiation.**

| A=8           | $L^*$    | $a^*$     | $b^*$     |
|---------------|----------|-----------|-----------|
| dark          | 0.97248  | 4.50548   | 0.62926   |
| 520 nm 5 cm   | 74.92507 | -55.83517 | 104.02919 |
| 520 nm 10 cm  | 57.95656 | -88.85889 | 77.69512  |
| 520 nm 30 cm  | 50.32491 | -87.04041 | 67.07541  |
| 520 nm 50 cm  | 41.28309 | -80.8209  | 54.98215  |
| 520 nm 75 cm  | 28.13932 | -66.94581 | 37.85496  |
| 520 nm 100 cm | 20.03931 | -54.79803 | 26.95607  |
| 520 nm 200 cm | 9.6315   | -26.8564  | 12.36842  |
| 590 nm 5 cm   | 71.46634 | -48.4878  | 99.4856   |
| 590 nm 10 cm  | 63.02139 | -56.25623 | 86.94902  |
| 590 nm 30 cm  | 41.75696 | -66.76855 | 56.45259  |
| 590 nm 50 cm  | 29.32685 | -60.30446 | 39.7325   |
| 590 nm 75 cm  | 15.50136 | -41.22305 | 20.7435   |
| 590 nm 100 cm | 8.86097  | -22.66024 | 11.27932  |
| 590 nm 200 cm | 3.59663  | -4.77306  | 3.84114   |
| 620 nm 5 cm   | 55.49107 | -16.78616 | 78.66372  |
| 620 nm 10 cm  | 46.55231 | -6.48636  | 66.84677  |
| 620 nm 30 cm  | 18.86094 | 22.90868  | 28.68406  |
| 620 nm 50 cm  | 10.20982 | 19.45706  | 15.06666  |
| 620 nm 75 cm  | 3.25088  | 9.36543   | 3.90281   |
| 620 nm 100 cm | 1.76779  | 6.52311   | 1.6936    |
| 620 nm 200 cm | 1.14145  | 4.89756   | 0.82787   |
| 660 nm 5 cm   | 41.21424 | 65.96748  | 66.77694  |
| 660 nm 10 cm  | 30.01994 | 60.15766  | 49.71381  |
| 660 nm 30 cm  | 16.32052 | 41.7544   | 26.60052  |
| 660 nm 50 cm  | 8.79497  | 31.36515  | 13.75171  |
| 660 nm 75 cm  | 4.18827  | 20.42745  | 5.88641   |
| 660 nm 100 cm | 1.96301  | 9.66989   | 2.15189   |
| 660 nm 200 cm | 1.17242  | 5.63655   | 0.89819   |

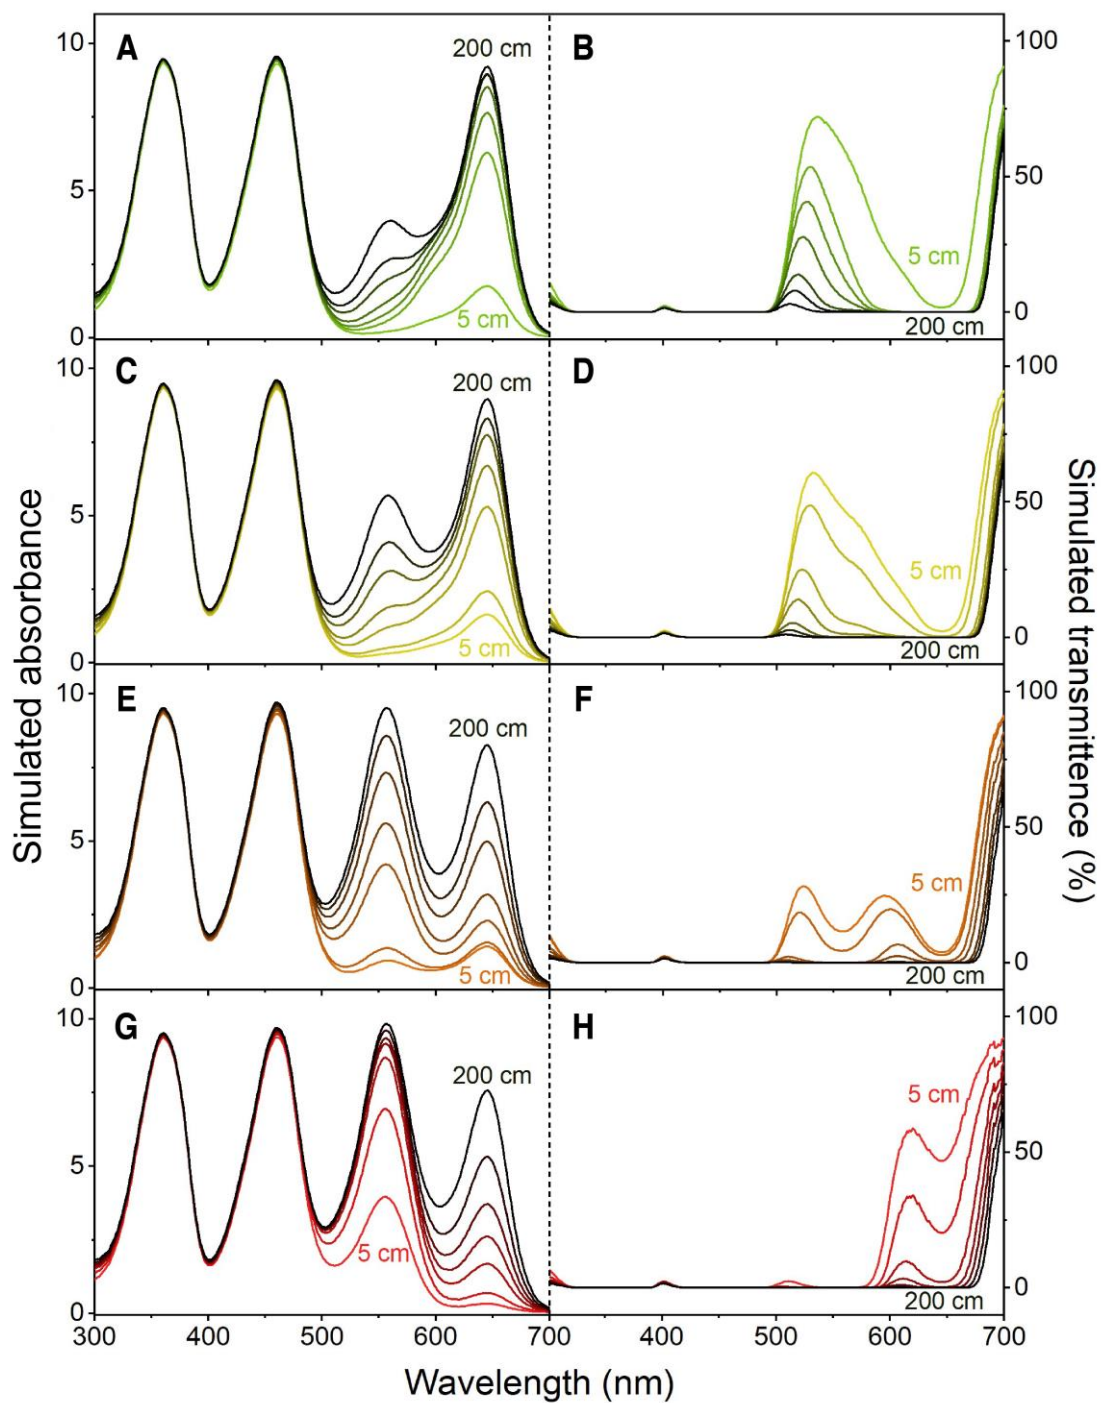

**Fig. S25. Absorption/transmission spectra with an initial absorbance of 10 under different light conditions.** Simulated absorption (left) and transmission (right) spectra of A4 solution (initial absorbance=10) under 520 (A and B), 590 (C and D), 620 (E and F) and 660 nm (G and H) irradiation at different distances.

**Table S42. Color coordinates with an initial absorbance of 10 under different light conditions.  $L^*$ ,  $a^*$ ,  $b^*$  values of A4 solution (initial absorbance=10) under light irradiation.**

| A=10          | $L^*$    | $a^*$     | $b^*$     |
|---------------|----------|-----------|-----------|
| dark          | 0.60011  | 4.21131   | 0.71325   |
| 520 nm 5 cm   | 70.9727  | -59.20033 | 101.19167 |
| 520 nm 10 cm  | 52.82014 | -87.39305 | 73.38171  |
| 520 nm 30 cm  | 44.37799 | -83.65173 | 61.86281  |
| 520 nm 50 cm  | 34.5584  | -75.46612 | 48.78841  |
| 520 nm 75 cm  | 20.9737  | -58.50028 | 30.04624  |
| 520 nm 100 cm | 13.12021 | -39.67296 | 18.72925  |
| 520 nm 200 cm | 4.45564  | -10.05305 | 5.89183   |
| 590 nm 5 cm   | 66.66583 | -50.93493 | 95.54814  |
| 590 nm 10 cm  | 57.10657 | -57.72572 | 81.53774  |
| 590 nm 30 cm  | 34.36302 | -63.62291 | 49.16672  |
| 590 nm 50 cm  | 21.81652 | -53.83036 | 31.40995  |
| 590 nm 75 cm  | 8.80855  | -24.16171 | 12.36727  |
| 590 nm 100 cm | 3.99936  | -7.62224  | 5.24348   |
| 590 nm 200 cm | 1.57219  | 0.96101   | 1.88108   |
| 620 nm 5 cm   | 48.01511 | -15.1456  | 71.37602  |
| 620 nm 10 cm  | 38.42029 | -3.86908  | 58.11368  |
| 620 nm 30 cm  | 12.0099  | 22.91469  | 19.17355  |
| 620 nm 50 cm  | 4.83162  | 17.3407   | 7.42774   |
| 620 nm 75 cm  | 1.49247  | 7.28912   | 2.01576   |
| 620 nm 100 cm | 0.92403  | 5.65536   | 1.16308   |
| 620 nm 200 cm | 0.67488  | 4.57242   | 0.80979   |
| 660 nm 5 cm   | 37.32402 | 66.39484  | 62.5626   |
| 660 nm 10 cm  | 25.71302 | 56.55098  | 43.61563  |
| 660 nm 30 cm  | 11.13483 | 36.74537  | 18.68163  |
| 660 nm 50 cm  | 4.54199  | 24.60673  | 7.3643    |
| 660 nm 75 cm  | 2.03901  | 12.36483  | 3.08033   |
| 660 nm 100 cm | 1.03629  | 7.00981   | 1.3918    |
| 660 nm 200 cm | 0.70157  | 4.94228   | 0.85836   |

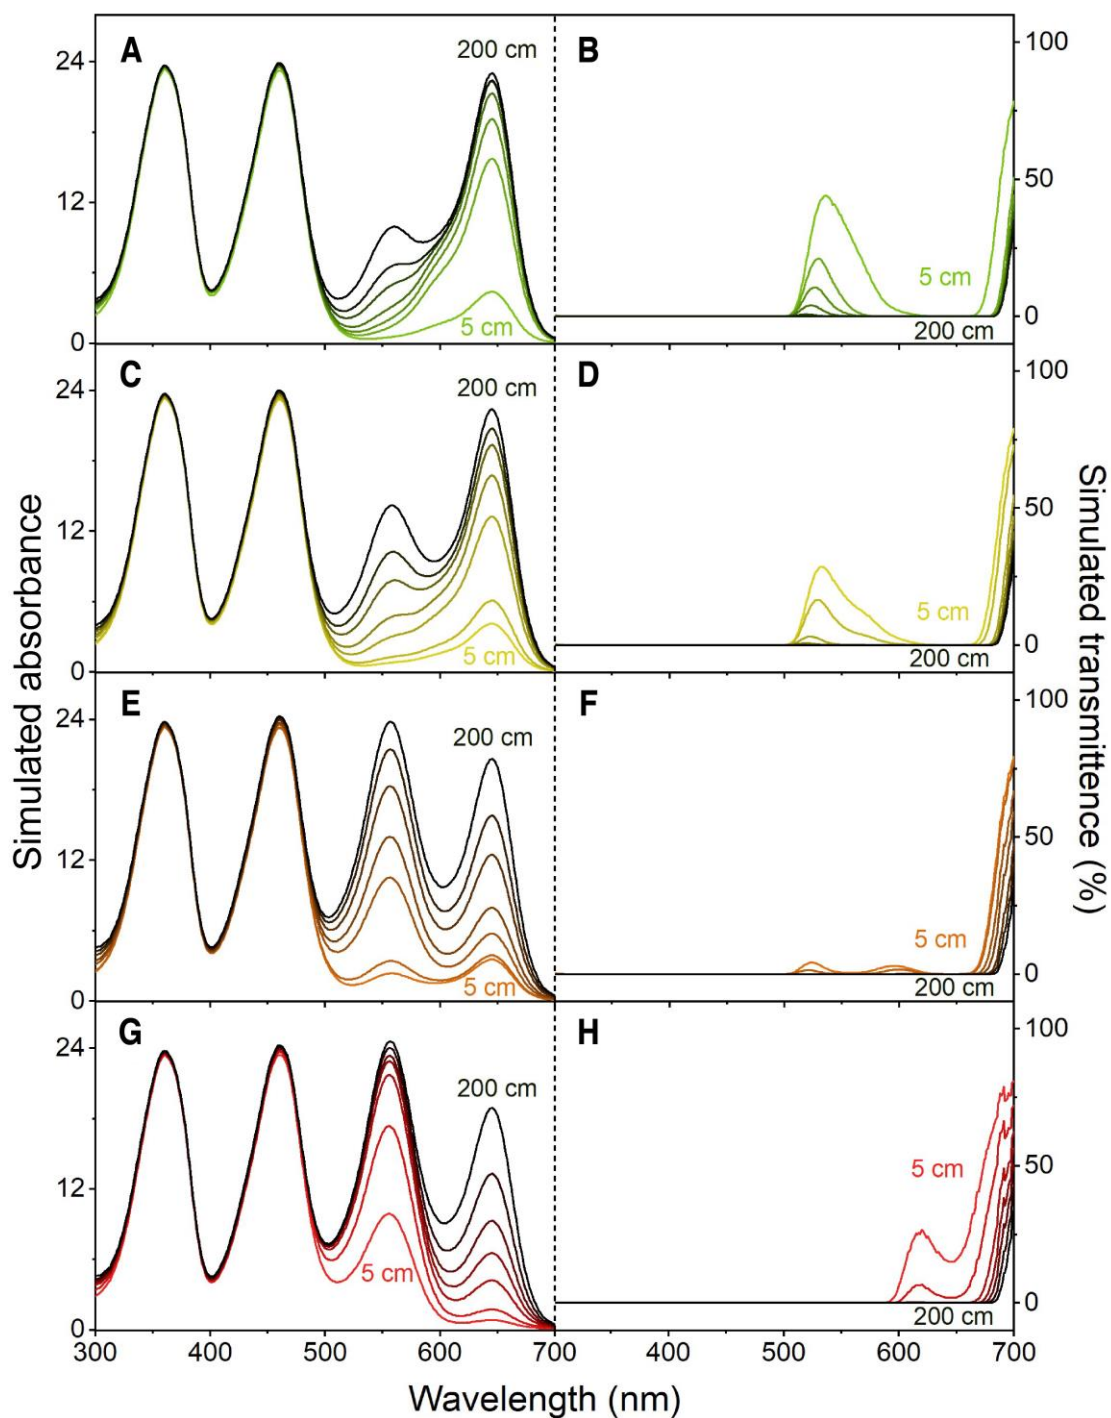

**Fig. S26. Absorption/transmission spectra with an initial absorbance of 25 under different light conditions.** Simulated absorption (left) and transmission (right) spectra of A4 solution (initial absorbance=25) under 520 (A and B), 590 (C and D), 620 (E and F) and 660 nm (G and H) irradiation at different distances.

**Table S43. Color coordinates with an initial absorbance of 25 under different light conditions.  $L^*$ ,  $a^*$ ,  $b^*$  values of A4 solution (initial absorbance=25) under light irradiation.**

| A=25          | $L^*$    | $a^*$     | $b^*$    |
|---------------|----------|-----------|----------|
| dark          | 0.22328  | 1.84109   | 0.38476  |
| 520 nm 5 cm   | 49.96496 | -63.54714 | 78.39018 |
| 520 nm 10 cm  | 27.87279 | -64.24431 | 44.0028  |
| 520 nm 30 cm  | 17.18625 | -49.86413 | 27.42332 |
| 520 nm 50 cm  | 6.8627   | -20.60989 | 10.91825 |
| 520 nm 75 cm  | 1.17565  | -0.7959   | 1.8456   |
| 520 nm 100 cm | 0.48106  | 1.73367   | 0.77954  |
| 520 nm 200 cm | 0.29108  | 2.24947   | 0.49669  |
| 590 nm 5 cm   | 40.85165 | -51.5909  | 64.971   |
| 590 nm 10 cm  | 27.66633 | -48.52457 | 44.34587 |
| 590 nm 30 cm  | 5.5438   | -14.36953 | 8.8319   |
| 590 nm 50 cm  | 1.26317  | -0.34112  | 1.9939   |
| 590 nm 75 cm  | 0.38053  | 2.42077   | 0.6369   |
| 590 nm 100 cm | 0.30592  | 2.41374   | 0.52346  |
| 590 nm 200 cm | 0.2676   | 2.19903   | 0.46077  |
| 620 nm 5 cm   | 13.58814 | -3.16375  | 22.44457 |
| 620 nm 10 cm  | 5.83603  | 8.07242   | 9.69324  |
| 620 nm 30 cm  | 0.80536  | 6.16685   | 1.38565  |
| 620 nm 50 cm  | 0.53956  | 4.40853   | 0.92946  |
| 620 nm 75 cm  | 0.37095  | 3.05625   | 0.63916  |
| 620 nm 100 cm | 0.30343  | 2.50115   | 0.52284  |
| 620 nm 200 cm | 0.24616  | 2.02957   | 0.42417  |
| 660 nm 5 cm   | 20.87877 | 52.30086  | 35.97161 |
| 660 nm 10 cm  | 6.88342  | 33.83856  | 11.8629  |
| 660 nm 30 cm  | 0.94835  | 7.21164   | 1.63435  |
| 660 nm 50 cm  | 0.55403  | 4.51645   | 0.95474  |
| 660 nm 75 cm  | 0.42259  | 3.47821   | 0.7282   |
| 660 nm 100 cm | 0.32834  | 2.70602   | 0.56578  |
| 660 nm 200 cm | 0.25797  | 2.12684   | 0.44452  |

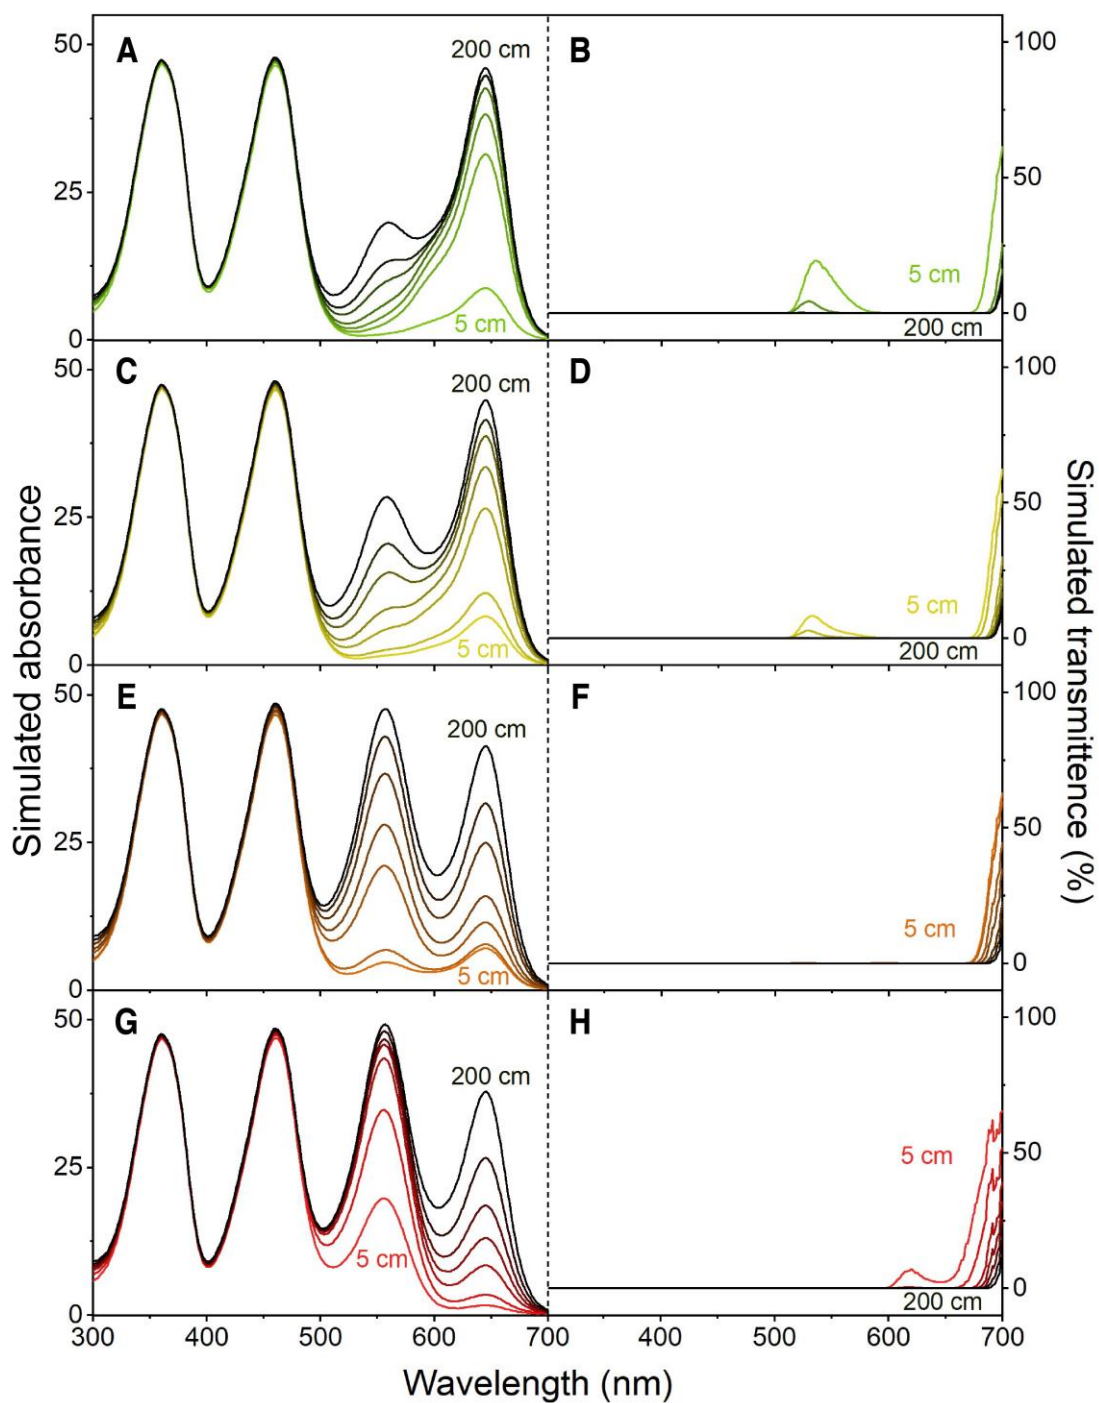

**Fig. S27. Absorption/transmission spectra with an initial absorbance of 50 under different light conditions.** Simulated absorption (left) and transmission (right) spectra of A4 solution (initial absorbance=50) under 520 (A and B), 590 (C and D), 620 (E and F) and 660 nm (G and H) irradiation at different distances.

**Table S44. Color coordinates with an initial absorbance of 50 under different light conditions.  $L^*$ ,  $a^*$ ,  $b^*$  values of A4 solution (initial absorbance=50) under light irradiation.**

| A=50          | $L^*$    | $a^*$     | $b^*$    |
|---------------|----------|-----------|----------|
| dark          | 0.08981  | 0.74071   | 0.15485  |
| 520 nm 5 cm   | 29.328   | -50.45732 | 48.21405 |
| 520 nm 10 cm  | 7.39445  | -21.80926 | 12.16421 |
| 520 nm 30 cm  | 7.39445  | -21.80926 | 12.16421 |
| 520 nm 50 cm  | 0.36585  | 0.80821   | 0.60516  |
| 520 nm 75 cm  | 0.16973  | 1.34687   | 0.29175  |
| 520 nm 100 cm | 0.15766  | 1.29741   | 0.27177  |
| 520 nm 200 cm | 0.14013  | 1.15564   | 0.2416   |
| 590 nm 5 cm   | 17.20879 | -34.6296  | 28.58512 |
| 590 nm 10 cm  | 5.49434  | -12.29547 | 9.09035  |
| 590 nm 30 cm  | 0.35907  | 1.65756   | 0.60337  |
| 590 nm 50 cm  | 0.20783  | 1.65933   | 0.35741  |
| 590 nm 75 cm  | 0.16851  | 1.38934   | 0.29052  |
| 590 nm 100 cm | 0.14939  | 1.23197   | 0.25756  |
| 590 nm 200 cm | 0.12606  | 1.03965   | 0.21735  |
| 620 nm 5 cm   | 0.96643  | 4.55092   | 1.63773  |
| 620 nm 10 cm  | 0.61137  | 4.60489   | 1.05034  |
| 620 nm 30 cm  | 0.35202  | 2.90006   | 0.60694  |
| 620 nm 50 cm  | 0.25702  | 2.11854   | 0.44313  |
| 620 nm 75 cm  | 0.16876  | 1.39151   | 0.29096  |
| 620 nm 100 cm | 0.13119  | 1.08181   | 0.22618  |
| 620 nm 200 cm | 0.10155  | 0.8375    | 0.17509  |
| 660 nm 5 cm   | 6.72559  | 33.88354  | 11.59189 |
| 660 nm 10 cm  | 0.95545  | 7.19627   | 1.64712  |
| 660 nm 30 cm  | 0.32121  | 2.64355   | 0.55382  |
| 660 nm 50 cm  | 0.23002  | 1.89552   | 0.39658  |
| 660 nm 75 cm  | 0.17926  | 1.47785   | 0.30908  |
| 660 nm 100 cm | 0.13763  | 1.1349    | 0.2373   |
| 660 nm 200 cm | 0.10576  | 0.87222   | 0.18235  |



**Table S45. Relative area of color tunability under different initial concentrations.**

Mathematical areas of A4 solutions with the initial absorbance between 0.5 and 50 (representing the tunable range of color) under light irradiation.

| Maximum Abs. | Mathematical area |
|--------------|-------------------|
| A=0.5        | 757.53            |
| A=1          | 2315.23           |
| A=2          | 5489.49           |
| A=4          | 8901.55           |
| A=6          | 9846.25           |
| A=8          | 9692.92           |
| A=10         | 9122.30           |
| A=25         | 4839.15           |
| A=50         | 1335.94           |

**Table S46. Color coordinates of different light sources.**  $L^*$ ,  $a^*$ ,  $b^*$  values of the LEDs with the wavelength of 520, 590, 620 and 660 nm.

| Light  | $L^*$ | $a^*$   | $b^*$ |
|--------|-------|---------|-------|
| 520 nm | 53.55 | -130.17 | 58.49 |
| 590 nm | 40.94 | 23.20   | 65.50 |
| 620 nm | 28.21 | 56.66   | 42.47 |
| 660 nm | 10.59 | 44.62   | 18.13 |

**Table S47. Color difference between the light source and samples with the initial absorbance at 0.5.** Color deviation ( $\Delta\theta$ ) values of A4 solution (initial absorbance=0.5) under light irradiation.

| A=0.5  | 520 nm | 590 nm | 620 nm | 660 nm |
|--------|--------|--------|--------|--------|
| 5 cm   | -42.93 | 41.55  | 71.82  | 61.94  |
| 10 cm  | -26.43 | 44.40  | 70.75  | 35.00  |
| 30 cm  | -22.46 | 54.57  | 58.74  | 20.18  |
| 50 cm  | -20.04 | 58.92  | 53.52  | 18.09  |
| 75 cm  | -18.91 | 61.67  | 50.81  | 20.26  |
| 100 cm | -18.90 | 63.18  | 47.09  | 25.28  |
| 200 cm | -18.17 | 65.22  | 64.68  | 49.80  |

**Table S48. Color difference between the light source and samples with the initial absorbance at 1.** Color deviation ( $\Delta\theta$ ) values of A4 solution (initial absorbance=1) under light irradiation.

| A=1    | 520 nm | 590 nm | 620 nm | 660 nm |
|--------|--------|--------|--------|--------|
| 5 cm   | -44.25 | 40.08  | 69.65  | 54.80  |
| 10 cm  | -26.14 | 43.45  | 68.35  | 29.13  |
| 30 cm  | -22.16 | 54.86  | 54.02  | 17.74  |
| 50 cm  | -19.72 | 59.58  | 48.52  | 16.48  |
| 75 cm  | -18.31 | 62.79  | 47.26  | 18.79  |
| 100 cm | -18.01 | 64.71  | 45.79  | 24.52  |
| 200 cm | -16.69 | 67.51  | 70.56  | 53.72  |

**Table S49. Color difference between the light source and samples with the initial absorbance at 2.** Color deviation ( $\Delta\theta$ ) values of A4 solution (initial absorbance=2) under light irradiation.

| A=2    | 520 nm | 590 nm | 620 nm | 660 nm |
|--------|--------|--------|--------|--------|
| 5 cm   | -44.84 | 39.18  | 67.23  | 43.37  |
| 10 cm  | -24.68 | 43.42  | 65.33  | 22.52  |
| 30 cm  | -20.80 | 56.70  | 45.77  | 15.51  |
| 50 cm  | -18.24 | 62.01  | 39.80  | 14.74  |
| 75 cm  | -16.18 | 66.25  | 40.91  | 16.47  |
| 100 cm | -15.19 | 69.05  | 43.13  | 21.92  |
| 200 cm | -12.58 | 73.34  | 82.11  | 58.68  |

**Table S50. Color difference between the light source and samples with the initial absorbance at 4.** Color deviation ( $\Delta\theta$ ) values of A4 solution (initial absorbance=4) under light irradiation.

| A=4    | 520 nm | 590 nm | 620 nm | 660 nm |
|--------|--------|--------|--------|--------|
| 5 cm   | -42.80 | 40.72  | 65.67  | 30.61  |
| 10 cm  | -21.14 | 46.28  | 62.35  | 19.27  |
| 30 cm  | -17.46 | 61.79  | 32.94  | 15.38  |
| 50 cm  | -14.57 | 68.03  | 26.72  | 13.72  |
| 75 cm  | -11.16 | 74.11  | 28.15  | 12.81  |
| 100 cm | -8.89  | 78.02  | 28.54  | 12.75  |
| 200 cm | -4.43  | 83.13  | 79.26  | 32.43  |

**Table S51. Color difference between the light source and samples with the initial absorbance at 6.** Color deviation ( $\Delta\theta$ ) values of A4 solution (initial absorbance=6) under light irradiation.

| A=6    | 520 nm | 590 nm | 620 nm | 660 nm |
|--------|--------|--------|--------|--------|
| 5 cm   | -40.06 | 43.15  | 65.30  | 25.98  |
| 10 cm  | -18.63 | 49.56  | 60.43  | 19.11  |
| 30 cm  | -15.04 | 66.09  | 24.06  | 14.62  |
| 50 cm  | -11.85 | 72.83  | 16.52  | 10.39  |
| 75 cm  | -7.55  | 79.30  | 5.98   | 4.45   |
| 100 cm | -4.73  | 82.75  | -8.47  | -4.51  |
| 200 cm | -0.45  | 84.74  | -19.77 | -9.12  |

**Table S52. Color difference between the light source and samples with the initial absorbance at 8.** Color deviation ( $\Delta\theta$ ) values of A4 solution (initial absorbance=8) under light irradiation.

| A=8    | 520 nm | 590 nm | 620 nm | 660 nm |
|--------|--------|--------|--------|--------|
| 5 cm   | -37.58 | 45.49  | 65.19  | 23.23  |
| 10 cm  | -16.97 | 52.41  | 58.69  | 17.45  |
| 30 cm  | -13.42 | 69.29  | 14.54  | 10.38  |
| 50 cm  | -10.03 | 76.12  | 0.90   | 1.56   |
| 75 cm  | -5.29  | 82.79  | -14.23 | -6.04  |
| 100 cm | -2.00  | 83.04  | -22.30 | -9.57  |
| 200 cm | -0.53  | 70.68  | -27.26 | -13.06 |

**Table S53. Color difference between the light source and samples with the initial absorbance at 10.** Color deviation ( $\Delta\theta$ ) values of A4 solution (initial absorbance=10) under light irradiation.

| A=10   | 520 nm | 590 nm | 620 nm | 660 nm |
|--------|--------|--------|--------|--------|
| 5 cm   | -35.48 | 47.56  | 65.13  | 21.18  |
| 10 cm  | -15.82 | 54.80  | 56.96  | 15.53  |
| 30 cm  | -12.29 | 71.81  | 3.07   | 4.83   |
| 50 cm  | -8.69  | 79.24  | -13.66 | -5.45  |
| 75 cm  | -2.99  | 82.40  | -21.39 | -8.13  |
| 100 cm | -1.08  | 74.98  | -25.23 | -10.89 |
| 200 cm | -6.18  | -7.56  | -26.81 | -12.26 |

**Table S54. Color difference between the light source and samples with the initial absorbance at 25.** Color deviation ( $\Delta\theta$ ) values of A4 solution (initial absorbance=25) under light irradiation.

| A=25   | 520 nm  | 590 nm | 620 nm | 660 nm |
|--------|---------|--------|--------|--------|
| 5 cm   | -26.78  | 57.95  | 61.17  | 12.40  |
| 10 cm  | -10.21  | 67.08  | 13.36  | -2.80  |
| 30 cm  | -4.61   | 77.93  | -24.19 | -9.35  |
| 50 cm  | -3.72   | 29.21  | -24.95 | -10.18 |
| 75 cm  | -42.48  | -55.76 | -25.04 | -10.29 |
| 100 cm | -131.59 | -58.26 | -25.04 | -10.31 |
| 200 cm | -143.35 | -58.66 | -25.05 | -10.31 |

**Table S55. Color difference between the light source and samples with the initial absorbance at 50.** Color deviation ( $\Delta\theta$ ) values of A4 solution (initial absorbance=50) under light irradiation.

| A=50   | 520 nm  | 590 nm | 620 nm | 660 nm |
|--------|---------|--------|--------|--------|
| 5 cm   | -19.50  | 69.96  | -17.06 | -3.23  |
| 10 cm  | -4.96   | 73.03  | -24.00 | -9.22  |
| 30 cm  | -4.96   | -50.50 | -25.03 | -10.28 |
| 50 cm  | -118.98 | -58.34 | -25.04 | -10.30 |
| 75 cm  | -143.58 | -58.69 | -25.04 | -10.30 |
| 100 cm | -143.97 | -58.69 | -25.04 | -10.31 |
| 200 cm | -144.00 | -58.69 | -25.04 | -10.31 |

### 11. Preparation of SAP solutions

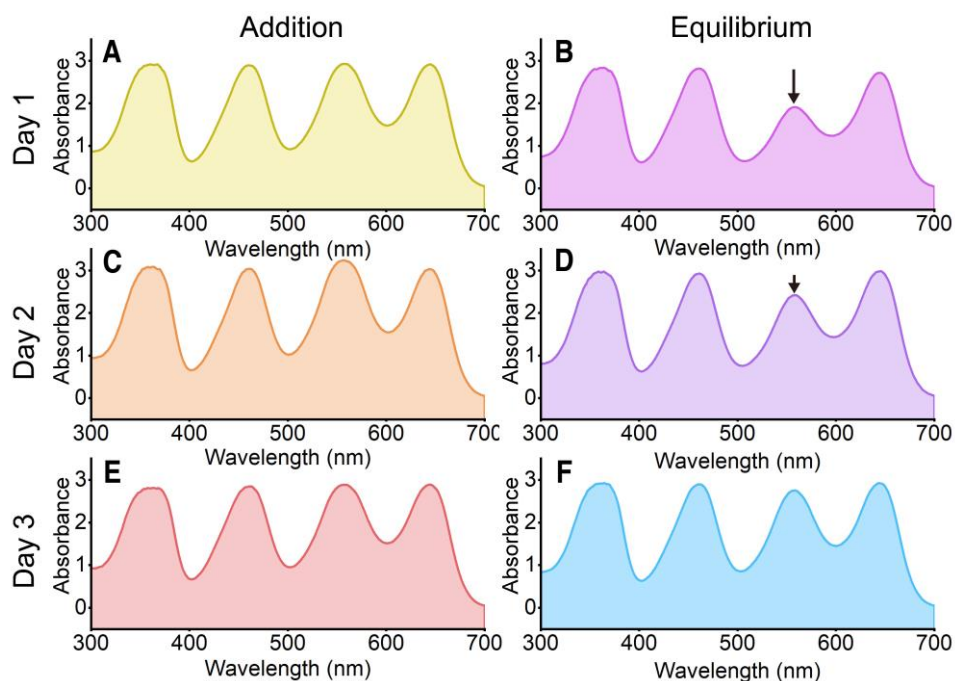

**Fig. S28. Absorption spectra of the preparation process of SAP solutions.** (A, C and E) UV-vis absorption spectra of the A4 solutions right after adding D1 at day 1, day 2 and day 3, respectively. (B, D and F) UV-vis absorption spectra of the A4 solutions at day 1, day 2 and day 3, respectively (before adding D1).

## 12. Processing of the video

Code Environment:

Python=3.7

```
from PIL import Image
```

```
import cv2
```

```
import numpy as np
```

```
import matplotlib.pyplot as plt
```

```
from PIL import Image
```

```
import cv2
```

```
import numpy as np
```

```
import matplotlib.pyplot as plt
```

```
def calculate_color_distance(color1, color2):
```

```
    rmean=(color1[0] - color2[0]) / 2
```

```
    r=color1[0] - color2[0]
```

```
    g=color1[1] - color2[1]
```

```
    b=color1[2] - color2[2]
```

```
    distance=np.sqrt(((2 + rmean / 256) * r * r + 4 * g * g + (2 + (255 - rmean) / 256) * b * b))
```

```
    return distance
```

```
def ave_rgb(im2):
```

```
    sum_r2=0
```

```
    sum_g2=0
```

```
    sum_b2=0
```

```
    for y in range(im2.size[1]):
```

```
        for x in range(im2.size[0]):
```

```
            pix=im2.getpixel((x, y))
```

```
            sum_r2=sum_r2 + pix[0]
```

```
            sum_g2=sum_g2 + pix[1]
```

```
            sum_b2=sum_b2 + pix[2]
```

```
    ave_r2=sum_r2 // (im2.size[1] * im2.size[0])
```

```
    ave_g2=sum_g2 // (im2.size[1] * im2.size[0])
```

```
    ave_b2=sum_b2 // (im2.size[1] * im2.size[0])
```

```
    pix0=(ave_r2, ave_g2, ave_b2)
```

```
    return pix0
```

```
def guiyihua(res):
```

```
    result=[]
```

```
    for rl in res:
```

```
        x=float(rl - np.min(res)) / (np.max(res) - np.min(res))
```

```
        result.append(x)
```

```
    return result
```

```
if __name__ == '__main__':
```

```
    video_path=r"D:\color\final.MP4"
```

```

camera=cv2.VideoCapture(video_path)
length=int(camera.get(cv2.CAP_PROP_FRAME_COUNT))
fps=int(camera.get(cv2.CAP_PROP_FPS))
video_time=length // fps
print("length:", length)
print("fps:", fps)
print("time:", video_time)
if not camera.isOpened():
    print("cannot open camera")
    exit(0)

j=0
res_lab=[]
res_lab_c=[]
R=[]
G=[]
B=[]

# loop read video frame
while True:
    ret, frame=camera.read()
    if not ret:
        break

    # left
    pt1=(265, 240)
    pt2=(275, 280)
    cv2.rectangle(frame, pt1, pt2, (0, 255, 0), 1)
    img1=frame[240:280, 265:275]
    cv2.imwrite(r"./left/" + str((j+1)) + '.jpg', img1)

    # mid
    pt1=(265+50, 240)
    pt2=(275+50, 280)
    cv2.rectangle(frame, pt1, pt2, (0, 255, 0), 1)
    img2=frame[240:280, 265+50:275+50]
    cv2.imwrite(r"./mid/" + str((j+1)) + '.jpg', img2)

    # right
    pt1=(265+100, 240)
    pt2=(275+100, 280)
    cv2.rectangle(frame, pt1, pt2, (0, 255, 0), 1)
    img3=frame[240:280, 265+100:275+100]
    cv2.imwrite(r"./right/" + str((j+1)) + '.jpg', img3)

    # color_distance

```

```

im2=Image.open(r"./mid/" + str((j+1)) + '.jpg') # 30 110
pix2=ave_rgb(im2)

im1=Image.open(r"./left/" + str((j+1)) + '.jpg') # 30 110
pix10=ave_rgb(im1)

im3=Image.open(r"./right/" + str((j+1)) + '.jpg') # 30 110
pix3=ave_rgb(im3)

R.append(pix2[0]-pix10[0])
G.append(pix2[1]-pix10[1])
B.append(pix2[2]-pix10[2])
distance_lab=calculate_color_distance(pix10, pix2)
distance_lab_c=calculate_color_distance(pix3, pix2)
res_lab.append(distance_lab)
res_lab_c.append(distance_lab_c)
print(res_lab)
print(res_lab_c)
j=j + 1
cv2.imshow("Camera", frame)
key=cv2.waitKey(1)
if key == 27:
    break
cv2.destroyAllWindows()

xaxis=np.linspace(0, video_time ,len(res_lab))
np.savetxt(r'res_lab.txt', res_lab, fmt='% .4f', delimiter=',')
np.savetxt(r'res_lab_c.txt', res_lab_c, fmt='% .4f', delimiter=',')
np.savetxt(r'r.txt', R, fmt='% .4f', delimiter=',')
np.savetxt(r'g.txt', G, fmt='% .4f', delimiter=',')
np.savetxt(r'b.txt', B, fmt='% .4f', delimiter=',')

res_lab_1=guiyihua(res_lab)
res_lab_2=guiyihua(res_lab_c)

plt.figure(1)
plt.plot(xaxis, res_lab_1 ,label="Lab_distance", color='b', linewidth=1)
plt.plot(xaxis, res_lab_2, label="Lab_distance_c", color='r', linewidth=1)
plt.legend()
plt.savefig("lab_distance_final.png")
plt.title("Color_Diff")
plt.xlabel("Time/(s)")
plt.ylabel('Distance')
plt.show()

```

### 13. SAP coatings

The microscopic images of the A4 paper after spray-coating the SAP coatings for 1, 5 and 10 times are shown in **Fig. S29**. To achieve a black pristine surface, the coating process is needed to be repeated for 10 times.

Due to the rapid evaporation of THF and DCM, uniform porous structure was formed on the surface of the film (**Fig. S23A and 23C**) A rapid annealing process at 150 °C for 10 s generates relatively tight and smooth surface. (**Fig. S23B and 23D**).

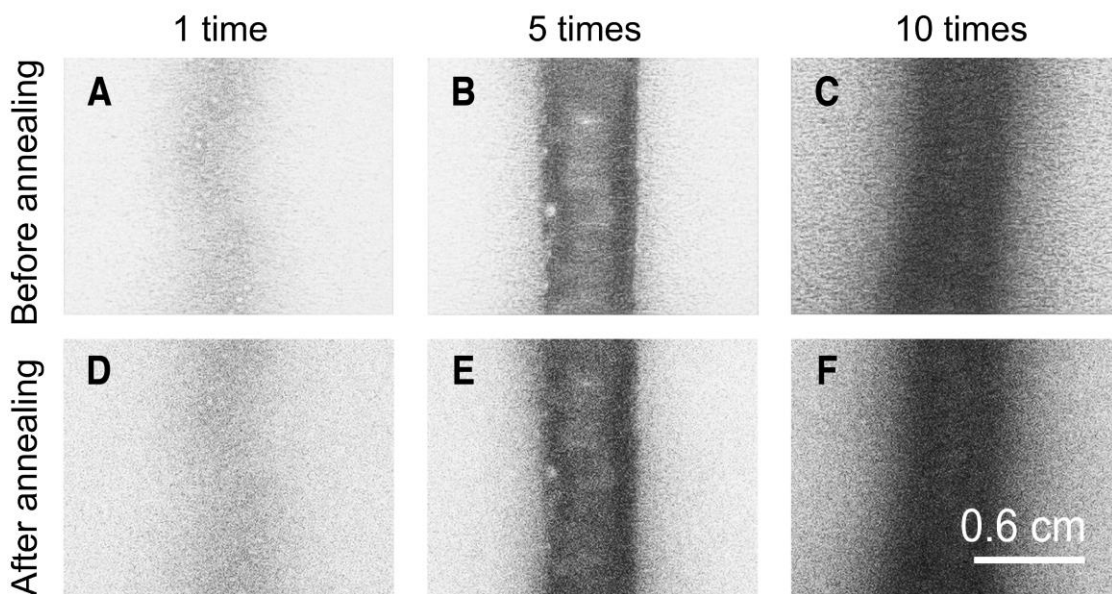

**Fig. S29. Images of samples with different spray coating times.** Microscopic images of the A4 paper after spray-coating for 1, 5 and 10 times before and after annealing.



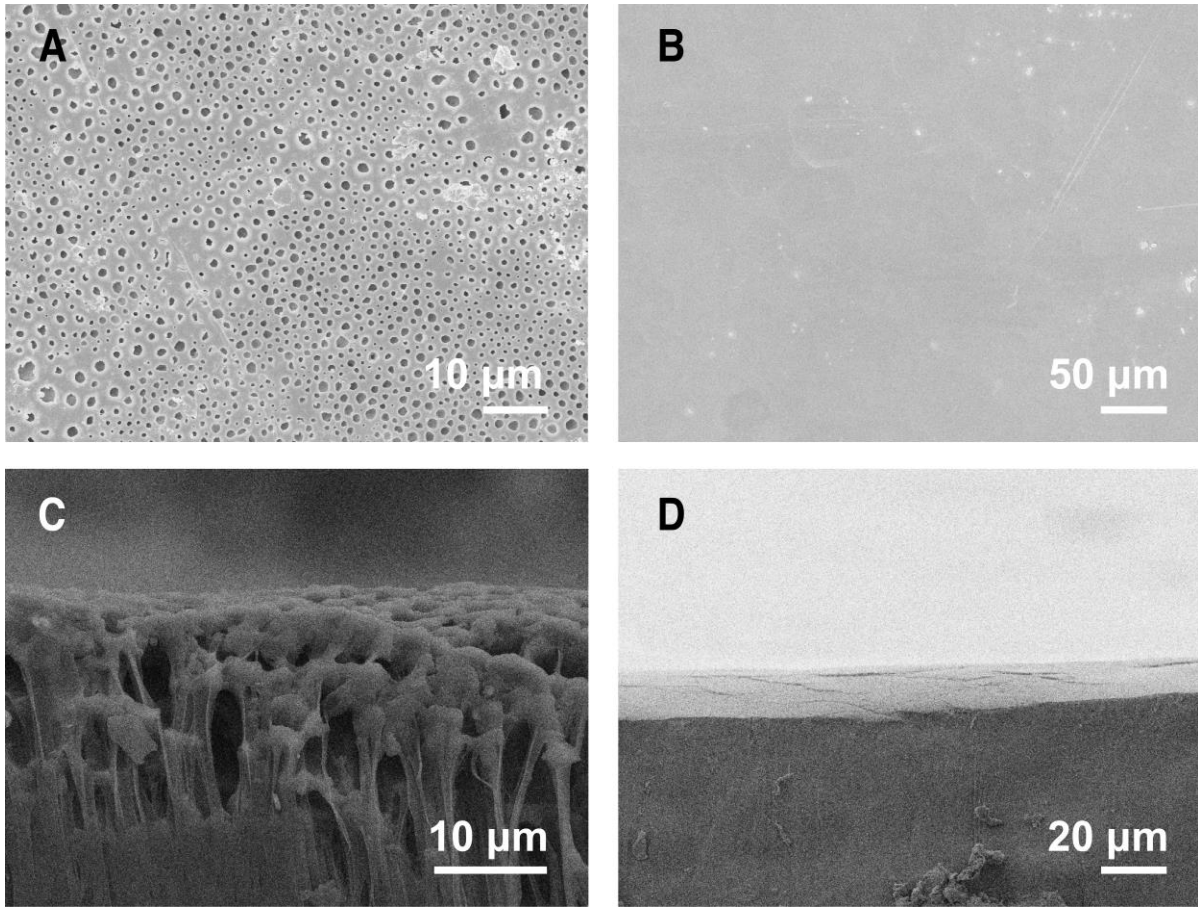

**Fig. S30. SEM images of SAP surfaces.** (A) Top view SEM image of the A4 paper after spray-coating for 10 times before annealing. (B) Top view SEM image of the A4 paper after spray-coating for 10 times after annealing. (C) Side view SEM image of the A4 paper after spray-coating for 10 times before annealing. (D) Side view SEM image of the A4 paper after spray-coating for 10 times after annealing.

## 14. Supplementary Text

Movies S1 to S9

*Movie S1: Active camouflage of SAP solutions in black, red, green, and yellow acrylic boxes.*

The left cuvette was loaded with SAP solutions and the right cuvette with black ink as the control. Black dots represent the in situ distance between the average RGB values of regions C and B, and colored dots represent the distance between regions A and B. The movie was speeded up and the timing information of the original movie was embedded in the movie.

*Movie S2: Color switching of SAP solutions below black, red, orange, yellow and green acrylic plates.*

The SAP solutions were placed below black, red, orange, yellow and green acrylic plates. The movie was speeded up and the timing information of the original movie was embedded in the movie.

*Movie S3: Color switching of SAP solutions in red, green and yellow bushes.*

The SAP solutions were placed in red (*Cyclamen persicum*), green (*Epipremnum aureum*) and yellow (*Ginkgo*) bushes, and a white light LED was set to the left of the plants. The movie was speeded up and the timing information of the original movie was embedded in the movie.

*Movie S4: Color switching of SAP solutions below red petal, green leaf and yellow leaf.*

SAP solutions were placed below red petal, green leaf and yellow leaf. The movie was speeded up and the timing information of the original movie was embedded in the movie.

*Movie S5: Color switching of SAP solutions under red, orange, yellow and green umbrellas.*

SAP solutions were set under red, orange, yellow and green umbrellas, respectively, which were put under sunlight (60000 lux, 37 °C, and bottles were stored in the dark and immersed in liquid nitrogen for 5 s before the experiments). The movie was speeded up and the timing information of the original movie was embedded in the movie.

*Movie S6: Active camouflage of SAP solutions under red, orange, yellow and green umbrellas.*

SAP solutions were set under a red umbrella, which were put under sunlight (60000 lux, 37 °C, and bottles were stored in the dark and immersed in liquid nitrogen for 5 s before the experiments). The umbrella was changed by yellow and green umbrellas sequentially. The movie was speeded up and the timing information of the original movie was embedded in the movie.

*Movie S7: Active camouflage of SAP solutions in NMR tube below sequentially arranged sticky notes.*

SAP solution was filled into a NMR tube, which was covered with sequentially arranged red, green and yellow sticky notes. A white light LED was set on the top. The movie was speeded up and the timing information of the original movie was embedded in the movie.

*Movie S8: Color switching of SAP films upon light irradiation with corresponding wavelength.*

SAP films were irradiated by 660, 520 and 590 nm light irradiation, respectively. The movie was speeded up and the timing information of the original movie was embedded in the movie.

*Movie S9: Color switching of ABS models upon light irradiation with corresponding wavelength.*

ABS models coated with SAP coatings were irradiated by 660, 520 and 590 nm light irradiation, respectively. The movie was speeded up and the timing information of the original movie was embedded in the movie.

Data S1 to S2

*Data S1: Raw data from Fig. 2 and the conversion process from the absorption spectra (300-800 nm) to the corresponding color coordinates.*

*Data S2: Raw data from Fig. S19-S27, Fig. 3A, and Fig. S4C, along with the conversion process from the absorption spectra (300-800 nm) to the corresponding color coordinates.*
